# Supplementary material
Source: publisher figshare collection journal article supplement (https://acs.figshare.com/ndownloader/files/10307406)
Supplement: Supplementary file 1 [file 10307406]

## Sheet: Supp Table 1
Supplementary Table 1. Gluten peptides identified in three out of the four brew replicates of the 200 mg/L wheat gluten incurred sorghum beer for the non-PEP containing beer and beer brewed with the standard dose of PEP (34 µL PEP/L wort), as shown in Figure 1.
No PEP		Standard Dose PEP (34 µL PEP/L wort)
Chymotryptic (363)	Hydrolyzed (8)	Chymotryptic (67)	Hydrolyzed (109)
AIHNVAHAIIM	APFASIVAGIGGQ	AQISEQARCQAVC	AIILHHHQQQQQQP
AIILHQQQQQQQ	ILVPLSQQQQVGQGIL	AQLEAIRSL	AIILHQQQKP
AIILHQQQQQQQQ	ILVPLSQQQQVGQGILVQGQ	CTIAPVGIFGTN	AIILHQQQKQQQQP
AIILQQQQQL	LQGQGIIQPQQPAQL	EQSQCQAIQNVVH	AIILHQQQKQQQQQQQP
AIIMHQQQQQQQEQQQQL	NIQVDPSGQVQWLQQ	GIIQPQQPAQL	AIILHQQQQQQQQQQQP
AINNVVHAIIL	PFASIVAGIGGQ	GQGIIQPQQPAQL	AIILHQQQQQQQQQQQQP
ALETLPAMCN	PSGQVQWLQQ	HLQPQQPISQQ	AIILHQQQQQQQQQQQQQP
ALETLPAMCNVY	VPFGVGTGVGGY	HLQPQQPISQQQ	AIILHQQQQQQQQQQQQQQQQQP
AQGSVQPQQLPQFAEIRNL		IAHASSQVSQQSY	AIILRQQQKQQQQP
AQGSVQPQQLPQFEEIRNL		IAHGSSQVLQESTY	AQGQQGQQLAQGQQGQQP
AQISEQARCQAVC		IPPYCTIAPVGIF	AQGQQGYYP
AQLEAIRSL		ISQQQQQQQQQQQIL	ASLQQVGQGQQIGQLGQRQQP
ARELNPSNKELQSPQQSF		ISQQQQQQQQQQQQQIL	DVVLQQHNLA
ARQLNPSNKEL		LLQQCKPVSL	EQIISQQPQQP
ASIVADIGGQ		LPPYCSTTIA	EQIISQQRQQP
ASIVAGIGGQ		LQLQPFPQPQLPY	EQWQQSGQGQPGHYP
CCQQLPQIPQQSRY		LQQQLNPCKNF	FLGQQQQHFP
CVSQPQQQSQQQL		LQQQLVPQLQQPL	FLGQQQQQFP
EAIRAIIY		LSQQQQLGQGTL	FLQQQRPP
ELQSPQQSF		NIAHGSSQVLQESTY	FSQQQQPPFSQQQQP
EQQPVVPSKAGSF		NVAEAIRQQQP	GQEQQGYDSPYHVS
FPQQQQFPQQQ		QLAQIPQQL	GQEQQGYDSPYHVSA
FQLVQGQGIIQPQQPAQL		QLIPCRDVVLQQP	GQGHQSGQGQQGYYP
FQPSQQNPQAQGF		QLIQGQGIIQPQQPAQL	GQGKQLGQGQQGYYP
FQPSQQNPQAQGSF		QLVQGQGIIQPQQPAQL	GQGLQGHYP
FQPSQQNPQAQGSFQPQ		QLVQGQGIIQPQQPAQY	GQGQPGYYLTSP
FQQQQIPQQQIPQQH		QQLNPCKVF	GQGQQAYYPTSSQQSRQRQ
GFVQPQQLPQFEEIRNL		QQPFPQPQQPF	GQGQQGQQLGQGQQGQQP
GIIQPQQPAQL		QQPQQQYPSGQGF	GQGQQGQQVGQGQQAQQPGQGQQP
GPSGQVQWPQQQPF		QQQLGQQPQQQQL	GQGQQGYYPTSP
GQCVSQPQQQLQQQL		QQQLIPCRDVVL	GQGQQGYYPTSPQQP
GQCVSQPQQQSQQQL		QQQLIPCRDVVLQ	GQGQQGYYSSSLQQP
GQGIIQPQQPAQL		QQQLIPCRDVVLQQ	GQGQQIGKGQQGYYP
GQGTLVQGQGIIQPQQL		QQQLIPCRDVVLQQP	GQGQQIGQGKQGYY
GQQQQQQLQEQLTPCTTF		QQQQPSSQVSY	GQGQQIGQGQQGYYP
GSLVQGQGIIQPQQPAQL		QQQQQPSSQVSY	GQGQQIGQGQQGYYPTSPQHP
GSSLTSIGGQ		QQQQQQQLI	GQGQQIGQGQQGYYPTSPQQP
GSSQVLQQSTY		QQQQQQQQLI	GQGQQLGQGQP
GSVQPQQIPQFEEIRNL		QQQQQQQQQLI	GQGQQLGQGQPGYYPTSQQP
GSVQPQQLPQFAEIRNL		QQQQQQQQQQLL	GQGQQLGQVQQP
HLQPQQPISQ		QQQQQQQQQQQII	GQGQQLGQWLQP
HLQPQQPISQQ		QQQQQQQQQQQQLI	GQGQQLGQWLQPGQGQQGYYP
HLQPQQPISQQQ		QQQQQQQQQQQQQQLL	GQGQQLRQGQQGQQSGQGQPRY
HLQPQQPISQQQAQ		QQQQQQQQQQQQQQQLI	GQGQQQGQGQQGYYP
HLQPQQPISQQQAQQ		QQVPQPQQPQQPF	GQGQQSGQGQQGYYP
HLQPQQPISQQQAQQQ		QQYPLGQGSF	GQGQQSGQGQQGYYPTSPQQSGQGQQP
HLQPQQPISQQQVQ		SIAHGSSQVL	GQGQQTRQGQQLEQGQQP
HLQPQQPISQQQVQQQQ		SIILPPSDCQVM	GQGQSGYYPTSPQQSGQKQP
HQPQQQFPQPQQPQQSFPQ		SIILQEQQQVQ	GQKQQSGQGQQGYYP
HQQPEQIISQQPQQPF		SIIMQQEQQEQLQGVQ	GQQQQFPPQQP
HQQQQQQQEQQQQL		SIIMQQEQQQGLQ	HAIILHQQQQQQQQQQQQQQP
HSIIMQQEQQQQL		SIIMQQEQQQQQ	HAIILHQQQQQQQQQQQQQQQQQP
HTPQEQFPQQQ		SIIMQQEQQQQQGIQ	IFSQQQQQQLFPQQP
IAHASSQVSQQSY		SIIMQQEQRQGVQ	IILHQQQQQQQQQQQKQP
IAHGSSQVLQESTY		SIIVQQQQQQQQ	IILHQQQQQQQQQQQP
ILQPQQPLPQQPQQPF		SIIVQQQQQQQQQ	IILHQQQQQQQQQQQQP
IPPYCTIAPVGIF		SIIVQQQQQQQQQQQ	IILHQQQQQQQQQQQQQQLYPSS
IQPQQPFPQQPQQTY		SIVLQEQQHGQGF	IILRQQQKQQQQP
IQPQQPLPQQAEQ		SIVLQEQQHGQGL	ILWYHQQQP
IQPSLQQQL		SIVMQQEQQQGIQ	IVLQEQQHGQGFNQP
IQPSLQQQLNPC		SLQQQLNPCKN	IVMQQEQQQGIQILRP
KELQSPQQSF		SLQQQMNPCKNF	LFSQQQQLFPQQP
KQFPQPQQIPQ		SLQQQVNPCKNF	LGQGTLVQGQGIIQP
KQQQQQQQQIL		TTISPSSDVTTDMGGY	LQGQGIIQPQQP
KTLPTMCNVY		VQGQGIIQPQQPAQL	LSQQQQLGQGTL
LALQTLPAMCN		VQQQIPIVQPSVL	LSQQQQLGQGTLVQGQ
LCNVHVPSDCY		VQQQLPVVQPSIL	LSQQQQLGQGTLVQGQGIIQP
LFPQQPSF			LSQQQQVGQGIL
LGQQQPFPPQQPYPQPQPFPSQQPY			LSQQQQVGQGSLVQGQ
LLESQQPFPQQPQQPF			LVQGQGIIQPQQP
LLGPQQPFPQQPQQSQQ			LVQQQQFIGQQQP
LLQQCKPVSL			LVQQQQFLGQQQQHFP
LLQQCNPVSL			LVQQQQFLGQQQQQ
LPQLPYPQPQPFPPQQSY			LVQQQQFLGQQQQQFP
LQGQGIIQPQQPAQL			LVQQQQFP
LQLQNPSQQQPQEQVPL			PSGQVQWLQ
LQLQPFPQPQLPY			PSGQVQWLQQ
LQLQPFPQPQLPYPQPQLPY			PSGQVQWLQQQLVP
LQLQPFPQPQLPYPQPQPF			PSGQVQWLQQQLVPQLQQP
LQLQPFPQPQLSY			QGQQGQQPERGQQGQQSGQGQQLGQGQQGQQP
LQLQPFPQPQPF			QLPFPLQPQQP
LQLQPFPQPQPFPPQLPYPQPQ			QPFTQQP
LQNPSQQQPQEQVPL			QPQQTFPHQP
LQPGQGQQGYYPTSPQQPGQGQQLGQW			QPQQTFPHRP
LQPHQIAQLEVM			QPQQTYPHQP
LQPHQISQLEVM			QQILQQILQQQ
LQPHQLAQL			QQLEQTISQQPQQP
LQPQHTFPLQPQ			QQLLQQILQQ
LQPQNPSLQQPQ			QQQFLGQQQP
LQPQNPSLQQPQEQVPL			QQQLGQGTLVQGQ
LQPQNPSQQEPQEQVPL			QQQLGQGTLVQGQGIIQP
LQPQNPSQQQPQEQVPL			QQQVGQGSLVQGQGIIQP
LQPQNPSQQQPQEQVPVVQQQQF			QQVGQGQQIGQLGQRQQP
LQPQNPSQQQSQEQVPL			QSQQLFSQQP
LQPQQAFPQQPQQPFPQ			QVVDQQLAGRLP
LQPQQPISQQ			RQWQQSGQGQQGHYP
LQPQQPISQQQ			SFSQQQLPP
LQPQQPISQQQAQ			SLVLRTLP
LQPQQPISQQQAQQ			SQVLQQSTYQ
LQPQQPISQQQAQQQ			SQVLQQSTYQL
LQPQQPISQQQAQQQQ			SSKVSQQSYQL
LQPQQPISQQQAQQQQQ			TSLHQSGQGQQGYYP
LQPQQPISQQQAQQQQQQQ			TSLQQLGQGQQTGQP
LQPQQPQQSFPQQQQPL			TSLQQLGQGQSGYYPTSPQQP
LQPRQPFPQQPQQPY			TSSQQSGQGHQSGQGQQGYYP
LQQPQQPFPQPQQVVQ			VPQLQPQHP
LQQPQQPSPQPQQVVQ			VPQLQPQNP
LQQQCIPVAM			VQWLQQQLVPQLQQP
LQQQLVPQLQQPL			VVQQQQFLGQQQP
LQQQMNPCKNF
LQQQQFPQQQPPQQH
LQTQVEQL
LQTQVEQLSSCQIVQY
LTSPQQSGQGQQPGQL
NIAHASSQVL
NIAHASSQVLQQSTY
NIAHGSSQVLQESTY
NIAQGRSQVL
NLQVDPSGQVQW
PHQPQQQFPQPQQPQQQF
PHQPQQQVPQPQQPQQPF
PLQPQQPFPQQSAQ
PLRPQQPFPQQPQQSQQ
PQPQLPYPQPQPF
PQPQPFPAQQPYPQPQ
PQPQPQYPQPQQPISQQ
PQQPFLQPQQPQQPFPQ
PQQPQLPFPQQPQQPF
PQQPQQPFPQTQQPQ
PQQPQQPYPQQPQQPFPQ
PQQPRLPFPQQPQ
PQQPYPQPQPQQPISQQQ
PQQPYPQPQPQQPISQQQAQ
PQQQFLQAQQPQ
PQQQLPLQPQQP
PQTQQPQQPFPQ
PSGQVQWPQQQLVPQPQQPL
PSQQPFPTPQQQF
PSQQPFPTPQQQFPEQSQQPF
PSQQPFPTPQQQFPQQSQQPF
PSQQQPQEQVPL
PWQPQQPFPQTQQ
QAFPQPQQTF
QAFPQPQQTFPHQPQ
QAFPQQPQQPFPQ
QHNIAHASSQVL
QHNIAHGSSQVLQESTY
QIFPQPQQTFPHQPQ
QIQCAALH
QLAQIPQQL
QLFPQSQQPQQQF
QLGQCVSQPQQQSQQQL
QLGQQPQQQQI
QLHNIAHESSQVL
QLIPCRDVVLQ
QLIQGQGIIQPQQPAQL
QLPQFEEIRNL
QLVPQLQQPL
QLVQGQGIIQPQQPAQL
QLVQGQGIIQPQQPAQY
QPQQPLPQQPQQPF
QPSQLNPQAQGSVQPQ
QPSQLNPQAQGSVQPQQLPQF
QPSQLNPQAQGSVQPQQLPQFAEIRNL
QPSQQNPQAQGF
QPSQQNPQAQGSVQPQQLPQFEEIRNL
QQFPQPQQPQQQF
QQFPQPQQPQQSFPQ
QQFPQPQQPQQSFPQQQRPF
QQFPQQQFPQQQ
QQHNIAHESSQVLQQSSY
QQHNIAHGSSQVLQESTY
QQIPQQQIPQQQFPQ
QQKQQPSSQVSF
QQLAQIPQQL
QQLGQQPQQQQI
QQLIPCRDVVL
QQLNPCKVF
QQLPQPQQPQQSFPQ
QQLPQPQQPQQSFPQQQRPF
QQLPQPQQPQQSFPQQQRSF
QQLVPQPQQPL
QQNPQAQGSVQPQQLPQFEEIRNL
QQPEQGQPRYYPTSPQQSGQL
QQPFPQPQQPF
QQPGQGQQIGKGQQGY
QQPGQGQQIGQGQQGY
QQPGQGQQQGQGQQGYYPTSL
QQPNIAHASSQVSQQSY
QQPQEQYPSGQGSF
QQPQLPFPQQPQQPF
QQPQQQFFQPQQ
QQPQQQYPLGQGSF
QQPQQQYPSGQGF
QQPQQQYPSGQGSF
QQPQQQYPSGQGSFQPS
QQPQQQYPSGQGSFQPSQQN
QQPQQQYPSGQGSFQPSQQNPQAQGF
QQPQQQYPSSQVSF
QQPQQQYPSSQVSFQPS
QQPVLPQQPPFSQQ
QQQAQQQQQQQQQQQQIL
QQQAQQQQQQQQQQQQQIL
QQQCCQELAQIPQQL
QQQIPQQPQQF
QQQLGQQPQQQQL
QQQLIPCMDVVLQQH
QQQLIPCRDVVL
QQQLIPCRDVVLQ
QQQLIPCRDVVLQQ
QQQLIPCRDVVLQQH
QQQLIPCRDVVLQQPN
QQQLNPCKNF
QQQPLPPQQTFPQQPL
QQQPSSQVSY
QQQQLIPCRDVIVL
QQQQLIPCRDVVLQ
QQQQQPSSQVSY
QQQQQQPSSQVSY
QQQQQQQEQQIL
QQQQQQQPSSQVSY
QQQQQQQQEQQIL
QQQQQQQQPSSQVSY
QQQQQQQQQEQQIL
QQQQQQQQQLI
QQQQQQQQQPSSQVSY
QQQQQQQQQQLL
QQQQQQQQQQPSSQVSY
QQQQQQQQQQQII
QQQQQQQQQQQPSSQVSY
QQQQQQQQQQQQLI
QQQQQQQQQQQQPSSQVSF
QQQQQQQQQQQQQII
QQQQQQQQQQQQQQLL
QQQQQQQQQQQQQQPSSQVSY
QQQQQQQQQQQQQQQLI
QQQQQQQQQQQQQQQQLL
QQQRQQPSSQVSF
QQRQQPSSQVSF
QQVPQPQQPQQPF
QQYPLGQGSF
QQYPQQQPSGSDVISISG
QQYPSGQGSF
QSFPQQQPSLIQQSL
QSFPQQQRPF
QSQQPFPQQPKQPQQSF
QSVQGVSQPQQQQKQL
QTFPHQPQQQVPQPQQPQQPF
QTFPQPQQTY
RPQQPFPQQPQQSQQ
RPQQPYPQPQPQ
RPQQPYPQPQPQY
RPQQPYPQSQPQY
RPQQSYPQPQPQY
RTLPNMCNVY
SFPPQQPYPQQQPQ
SFPQPQPQQPQQPS
SHQQQPFPQQPY
SHQQQPFPQQPYPQQPY
SHQQQPFPQQPYPQQPYPSQQPY
SIILPPSDCQVM
SIILQEQQQVQ
SIILQEQQQVQGSIQ
SIILQQQQQQQQQ
SIIMQQEQQEQL
SIIMQQEQQEQLQGVQ
SIIMQQEQQQQQGIQ
SIIMQQEQRQGVQ
SIIMQQQQQQQQQQ
SIIVQQQQQQ
SIIVQQQQQQQ
SIIVQQQQQQQQ
SIIVQQQQQQQQQ
SIIVQQQQQQQQQQ
SIIVQQQQQQQQQQQ
SIIWPQSDCQVM
SIVLQEQQHGQ
SIVLQEQQHGQGF
SIVLQEQQHGQGL
SIVMQQEQQQGIQ
SLLLQQQQQQQ
SLLLQQQQQQQQ
SLQQPGQGQQGYYPTSL
SLQQPGQGQQPGQW
SLQQQMNPCKNF
SLQQTGQGQQSGQGQQGYY
SQLQQPQQPLPQPQ
SQPQHPISQQQQQQQQQQQQEQQIL
SQPQHQVPIEITRM
SQPQQPISQQQQQQQQQIL
SQPQQPISQQQQQQQQQQQQQIL
SQPQQPISQQQQQQQQQQQQQQQIL
SQQPFPQPQQL
SQQPFPRPQQL
SQQPQQAFPQPQ
SQQPQQAFPQPQQTF
SQQPQQIFPQPQQTF
SQQPQQPFPQPQQQF
SQQPQQTFPQPQQTF
SQQPQQTFPQPQQTFPHQPQ
SQQPQQTFPQPQQTFPHQPQQQF
SQQPQRPQQPFPQQPQ
SQQQQIPVIHPSVL
SQQQQLGQGTL
SQQQQPVIPQQPPF
SQQQQPVLPQQQPV
SQQQQPVLPQQQPVIIL
SQQQQQPLLPQQPPF
SQQQQQPVLPQQQIPF
SQQQQVGQGIL
SQQQQVGQGILVQ
SQQQQVGQGSL
SQQQQVGQGSLVQ
SQQQQVGQGSLVQGQ
SQQQQVGQGSLVQGQGIIQPQQPAQL
SQQQQVGQGTL
SSSLQQPGQGLQGHYPASL
TASLQQPGQGQQGHYPASL
TQQPQQPFPQQPQQPFPQ
TTISPSSDVTTDMGGY
VFVPPECSTTKAPF
VLKTLPTM
VLQTLPSMCN
VLQTLPTMCNVY
VLRTLPNMCNVY
VPPECSIIRAPF
VQATSTQPQQQQQQGQQQQQGL
VQGQGIIQPQQL
VQGQGIIQPQQLAQL
VQGQGIIQPQQPAQL
VQGQGIIQPQQPAQY
VQPQHLPQLEEISNL
VQPQQIPQFEEIRNL
VQPQQLPQFEE
VQPQQLPQFQEIRNL
VQQQLPVVQPSIL
VQQQQFPGQQQ
VRPDCSTINAPF
VRVPVPQLQ
VRVPVPQLQPQNPSQQQPQEQVPL
VSPDCSTINAPFAN
VTVPVPQLQPQNPSQQQPQ
VYLPPYCST
WQPGQGQQGY
YLQPQQPISQQ
YLQPQQPISQQQ
YLQPQQPISQQQAQ
YLQPQQPISQQQAQQ
YLQPQQPISQQQAQQQ
YLQPQQPISQQQAQQQQ
YPGQASPQQPGQGQQPGKW
YPGVTSPRQGSY
YPTSPQQSGQGQQL
YQQPQQTFPQPQ
YQQQQVGQGTL
YSQPQQPISQQ
YSQPQQPISQQQ
YSQPQQPISQQQQ
YSQPQQPISQQQQQQ
YSQPQQPISQQQQQQQQ
YSQPQQPISQQQQQQQQQQQQ
YSQPQQPISQQQQQQQQQQQQQIL
YYPTSPQLSGQGQRPGQW

## Sheet: Supp Table 2
Supplementary Table 2. Gluten peptides identified in both brew replicates 3 and 4 of the 200 mg/L wheat gluten incurred sorghum beer with their associated gluten protein class for the non-PEP containing beer and beer brewed with either the standard dose of PEP (34 µL PEP/L wort) or the high dose of PEP (212 µL PEP/L wort), as shown in Figure 4.
No PEP				Standard Dose PEP (34 µL PEP/L wort)				High Dose PEP (212 µL PEP/L wort)
Chymotryptic (292)	Gluten Protein Class	Hydrolyzed (4)	Gluten Protein Class	Chymotryptic (63)	Gluten Protein Class	Hydrolyzed (106)	Gluten Protein Class	Chymotryptic (21)	Gluten Protein Class	Hydrolyzed (81)	Gluten Protein Class
AIHNVAHAIIM	alpha-gliadin	APFASIVAGIGGQ	gamma-gliadin	EQSQCQAIQNVVH	alpha-gliadin	AIILHHHQQQQQQP	alpha-gliadin	HLQPQQPISQQ	alpha-gliadin	AIILHQQQQQQGQHQQSS	alpha-gliadin
AIILHQQQQQQQ	alpha-gliadin	NIQVDPSGQVQWLQQ	gamma-gliadin	EQSQCQAIQNVVHA	alpha-gliadin	AIILHQQQKP	alpha-gliadin	QQPQQQYPLGQGSF	alpha-gliadin	AIILHQQQQQQGQHQQSSQVSYQQP	alpha-gliadin
AIILHQQQQQQQQ	alpha-gliadin	PSGQVQWLQQ	gamma-gliadin	HLQPQQPISQQ	alpha-gliadin	AIILHQQQKQQQQP	alpha-gliadin	QQQLIPCRDVVLQ	alpha-gliadin	AIILHQQQQQQQQQQQP	alpha-gliadin
AIIMHQQQQQQEQQQQLQ	alpha-gliadin	VQGQGIIQPQQPAQLEVLR	gamma-gliadin	HLQPQQPISQQQ	alpha-gliadin	AIILHQQQQQQGQHQQ	alpha-gliadin	QQQQQQQQQQQQLL	alpha-gliadin	AIILHQQQQQQQQQQQQP	alpha-gliadin
ALETLPAMCN	alpha-gliadin			HQQQQQQQEQQQQL	alpha-gliadin	AIILHQQQQQQQQQQQKQP	alpha-gliadin	AIILQQQQQL	gamma-gliadin	AIILHQQQQQQQQQQQQQP	alpha-gliadin
ALETLPAMCNVY	alpha-gliadin			IAHASSQVSQQSY	alpha-gliadin	AIILHQQQQQQQQQQQP	alpha-gliadin	AQLEAIRSL	gamma-gliadin	AIILHQQQQQQQQQQQQQQLYPSS	alpha-gliadin
AQGSVQPQQLPQFAEIRNL	alpha-gliadin			IPPYCSTTIA	alpha-gliadin	AIILHQQQQQQQQQQQQP	alpha-gliadin	GQGIIQPQQPAQL	gamma-gliadin	AIILHQQQQQQQQQQQQQQQQP	alpha-gliadin
AQGSVQPQQLPQFEEIRNL	alpha-gliadin			IPPYCSTTL	alpha-gliadin	AIILHQQQQQQQQQQQQQP	alpha-gliadin	LLQQCKPVSL	gamma-gliadin	AIILHQQQQQQQQQQQQQQQQQP	alpha-gliadin
FFQPSQQNPQAQGF	alpha-gliadin			IPPYCTIAPVGIF	alpha-gliadin	AIILHQQQQQQQQQQQQQQQQP	alpha-gliadin	LQQQLNPCKNF	gamma-gliadin	AIILHQQQQQQQQQQQQQQQQQQEQQQQQP	alpha-gliadin
FQPSQQNPQAQGF	alpha-gliadin			ISQQQQQQQQQQQQQIL	alpha-gliadin	AIILHQQQQQQQQQQQQQQQQQP	alpha-gliadin	LQQQLVPQLQQPL	gamma-gliadin	DVVLQQHNLA	alpha-gliadin
FQPSQQNPQAQGSF	alpha-gliadin			LQLQPFPQPQLPY	alpha-gliadin	AIILRQQQKQQQQP	alpha-gliadin	QLVQGQGIIQPQQPAQL	gamma-gliadin	DVVLQQHNLAH	alpha-gliadin
GFVQPQQLPQFEEIRNL	alpha-gliadin			NIAHGSSQVLQESTY	alpha-gliadin	DVVLQQHNLA	alpha-gliadin	QQVPQPQQPQQPF	gamma-gliadin	FLGQQQQHFP	alpha-gliadin
GSSQVLQQSTY	alpha-gliadin			QQPQQQYPLGQGSF	alpha-gliadin	DVVLQQHNLAH	alpha-gliadin	SIIVQQQQQQ	gamma-gliadin	GQQQQFPPQQP	alpha-gliadin
GSVQPQQLPQFAEIRNL	alpha-gliadin			QQPQQQYPSGQGF	alpha-gliadin	FLGQQQQHFP	alpha-gliadin	SIIVQQQQQQQQQQ	gamma-gliadin	HAIILHQQQQQQQQQQQQQQP	alpha-gliadin
HLQPQQPISQ	alpha-gliadin			QQQLIPCMDVV	alpha-gliadin	GQQQQFPPQQP	alpha-gliadin	SIIVQQQQQQQQQQQ	gamma-gliadin	IILHQQQQQQGQHQQSSQVSYQQP	alpha-gliadin
HLQPQQPISQQ	alpha-gliadin			QQQLIPCRDVVLQ	alpha-gliadin	HAIILHQQQQQQQQQQQQQQP	alpha-gliadin	SLQQQLNPCKN	gamma-gliadin	IILHQQQQQQQQQQQP	alpha-gliadin
HLQPQQPISQQQ	alpha-gliadin			QQQLIPCRDVVLQQ	alpha-gliadin	IAYGSSQVLQQSTYQL	alpha-gliadin	SLQQQVNPCKNF	gamma-gliadin	IILHQQQQQQQQQQQQKQP	alpha-gliadin
HLQPQQPISQQQAQQ	alpha-gliadin			QQQLIPCRDVVLQQP	alpha-gliadin	IILHQQQQQQQQQQQQP	alpha-gliadin	SQQQQVGQGILVQ	gamma-gliadin	IILHQQQQQQQQQQQQP	alpha-gliadin
HLQPQQPISQQQAQQQ	alpha-gliadin			QQQQLIPCRDV	alpha-gliadin	IILHQQQQQQQQQQQQQP	alpha-gliadin	VQGQGIIQPQQL	gamma-gliadin	IILHQQQQQQQQQQQQQP	alpha-gliadin
HLQPQQPISQQQVQ	alpha-gliadin			QQQQPSSQVSY	alpha-gliadin	IILHQQQQQQQQQQQQQQLYPSS	alpha-gliadin	VQGQGIIQPQQPAQL	gamma-gliadin	IIMHQQQQQQQEQQQQLQQQQQQQLQQQRQQP	alpha-gliadin
HLQPQQPISQQQVQQQQ	alpha-gliadin			QQQQQQQQQLI	alpha-gliadin	IILRQQQKQQQQP	alpha-gliadin	VQQQLPVVQPSIL	LMW-glutenin	LVQQQQFLGQQQP	alpha-gliadin
HQQQQQQQEQQQQL	alpha-gliadin			QQQQQQQQQQII	alpha-gliadin	LVQQQQFLGQQQP	alpha-gliadin			LVQQQQFLGQQQQHFP	alpha-gliadin
IAHASSQVSQQSY	alpha-gliadin			QQQQQQQQQQQIL	alpha-gliadin	LVQQQQFLGQQQQHFP	alpha-gliadin			LVQQQQFLGQQQQQ	alpha-gliadin
IPPHCSTTIAPFG	alpha-gliadin			QQQQQQQQQQQQLL	alpha-gliadin	LVQQQQFLGQQQQQ	alpha-gliadin			LVQQQQFLGQQQQQFP	alpha-gliadin
IPPYCTIAPVGIF	alpha-gliadin			QQQQQQQQQQQQQQLI	alpha-gliadin	LVQQQQFLGQQQQQFP	alpha-gliadin			QQEQQQQLQQQQQQQLQQQRQQP	alpha-gliadin
LALQTLPAMCN	alpha-gliadin			QQQQQQQQQQQQQQQII	alpha-gliadin	QLQQQQQQQLHQQRQQP	alpha-gliadin			QQILQQILQQQ	alpha-gliadin
LPQLPYPQPQPFPPQQSY	alpha-gliadin			QQQQQQQQQQQQQQQQLL	alpha-gliadin	QQQFIGQQQP	alpha-gliadin			QQILQQLLQQ	alpha-gliadin
LQLQPFPQPQL	alpha-gliadin			QQYPLGQGSF	alpha-gliadin	QQQQQQQEKQQILQQI	alpha-gliadin			QQILQQQLIP	alpha-gliadin
LQLQPFPQPQLPY	alpha-gliadin			AQISEQARCQAVC	avenin	QQQQQQQQLLQQI	alpha-gliadin			QQQFIGQQQP	alpha-gliadin
LQLQPFPQPQLPYPQPQPF	alpha-gliadin			NVAEAIRQQQP	avenin	SGQGSFQPSQQNP	alpha-gliadin			QQQQLQQQQQQQLQQQRQQP	alpha-gliadin
LQLQPFPQPQPF	alpha-gliadin			AQLEAIRSL	gamma-gliadin	SQVLQQSTYQ	alpha-gliadin			SQVLQQSTYQ	alpha-gliadin
LQLQPFPQPQPFPPQLPYPQPQ	alpha-gliadin			GIIQPQQPAQL	gamma-gliadin	SSKVSQQSYQL	alpha-gliadin			IIMQQEQQEQLQGVQ	gamma-gliadin
LQPQNPSIQQPQ	alpha-gliadin			LLQQCKPVSL	gamma-gliadin	VPQLQPQHP	alpha-gliadin			IIMQQQQQQQQQQGMHI	gamma-gliadin
LQPQNPSLQQPQEQVPL	alpha-gliadin			LQQQLNPCKNF	gamma-gliadin	VPQLQPQNP	alpha-gliadin			IIMQQQQQQQQQQGMHIF	gamma-gliadin
LQPQNPSQQEPQEQVPL	alpha-gliadin			LSQQQQLGQGTL	gamma-gliadin	VVQQQQFLGQQQP	alpha-gliadin			LGQGTLVQGQGIIQP	gamma-gliadin
LQPQNPSQQQPQEQVPL	alpha-gliadin			QLAQIPQQL	gamma-gliadin	IIMQQQQQQQQQQGMHIF	gamma-gliadin			LSQQQQLGQGTLVQGQ	gamma-gliadin
LQPQNPSQQQPQEQVPVVQQQQF	alpha-gliadin			QLIQGQGIIQPQQPAQL	gamma-gliadin	IVMQQEQQQGIQILRP	gamma-gliadin			LSQQQQVGQGSLVQGQ	gamma-gliadin
LQPQQPISQQ	alpha-gliadin			QLVQGQGIIQPQQPAQL	gamma-gliadin	LGQGTLVQGQGIIQP	gamma-gliadin			LSQQQQVGQGSLVQGQGIIQPQQP	gamma-gliadin
LQPQQPISQQQ	alpha-gliadin			QLVQGQGIIQPQQPAQY	gamma-gliadin	LQGQGIIQPQQP	gamma-gliadin			QQQLGQGTLVQGQ	gamma-gliadin
LQPQQPISQQQAQ	alpha-gliadin			QQLQCAAIH	gamma-gliadin	LSQQQQLGQGTL	gamma-gliadin			AQGQQGYYP	HMW-glutenin
LQPQQPISQQQAQQ	alpha-gliadin			QQPFPQPQQPF	gamma-gliadin	LSQQQQLGQGTLVQGQ	gamma-gliadin			AQGQQGYYPTSP	HMW-glutenin
LQPQQPISQQQAQQQ	alpha-gliadin			QQQCCQELAQIPQQL	gamma-gliadin	LSQQQQLGQGTLVQGQGIIQP	gamma-gliadin			EQWQQSGQGQPGHYP	HMW-glutenin
LQPQQPISQQQAQQQQ	alpha-gliadin			QQVPQPQQPQQPF	gamma-gliadin	LSQQQQVGQGIL	gamma-gliadin			GHGQQLVQGQQQGQGQQGHYP	HMW-glutenin
LQPQQPISQQQAQQQQQ	alpha-gliadin			SIIMQQEQQEQLQG	gamma-gliadin	LSQQQQVGQGILVQGQGIIQP	gamma-gliadin			GQGHQSGQGQQGYYP	HMW-glutenin
LQPQQPISQQQAQQQQQQQ	alpha-gliadin			SIIMQQEQQEQLQGVQ	gamma-gliadin	LSQQQQVGQGSLVQGQ	gamma-gliadin			GQGKQLGQGQQGYYP	HMW-glutenin
NIAHASSQVL	alpha-gliadin			SIIMQQEQQQGIQ	gamma-gliadin	PSGQVQWLQQ	gamma-gliadin			GQGLQGHYP	HMW-glutenin
NIAHGSSQVLQESTY	alpha-gliadin			SIIMQQEQQQQQGIQ	gamma-gliadin	QLPFPLQPQQP	gamma-gliadin			GQGQQGQQLGQGQQGQQP	HMW-glutenin
PQPQLPYPQPQPF	alpha-gliadin			SIIMQQEQRQGVQ	gamma-gliadin	QPQQTFPHQP	gamma-gliadin			GQGQQGQQLGQGQQGYYP	HMW-glutenin
PQPQPFPAQQPYPQPQ	alpha-gliadin			SIIVQQQQQQQQ	gamma-gliadin	QPQQTYPHQP	gamma-gliadin			GQGQQGYDSPYHVS	HMW-glutenin
PQPQPQYPQPQQPISQQ	alpha-gliadin			SIIVQQQQQQQQQ	gamma-gliadin	QQQLGQGTLVQGQ	gamma-gliadin			GQGQQGYDSPYHVSAEHQ	HMW-glutenin
PQQPYPQPQPQQPISQQQ	alpha-gliadin			SIIVQQQQQQQQQQQ	gamma-gliadin	QQQLGQGTLVQGQGIIQP	gamma-gliadin			GQGQQGYYSSSLQQP	HMW-glutenin
PQQPYPQPQPQQPISQQQAQ	alpha-gliadin			SLILPPSDCQVM	gamma-gliadin	QQQVGQGILVQGQGIIQP	gamma-gliadin			GQGQQIGKGQQGYYP	HMW-glutenin
QHNIAHASSQVL	alpha-gliadin			SLQQQLNPCKN	gamma-gliadin	QQQVGQGSLVQGQ	gamma-gliadin			GQGQQIGQGKQGYYP	HMW-glutenin
QHNIAHGSSQVLQESTY	alpha-gliadin			SLQQQMNPCKNF	gamma-gliadin	QQQVGQGSLVQGQGIIQP	gamma-gliadin			GQGQQIGQGQQGYY	HMW-glutenin
QLHNIAHESSQVL	alpha-gliadin			SLQQQVNPCKNF	gamma-gliadin	QSQQLFSQQP	gamma-gliadin			GQGQQIGQGQQGYYP	HMW-glutenin
QLIPCRDVVLQ	alpha-gliadin			GYYPSVSSPQQGPY	HMW-glutenin	QVGQGTLVQGQ	gamma-gliadin			GQGQQIGQLGQRQQP	HMW-glutenin
QPSQLNPQAQGSVQPQQLPQF	alpha-gliadin			RLEGGDALSASQ	HMW-glutenin	VQWLQQQLVPQLQQP	gamma-gliadin			GQGQQLGQGQP	HMW-glutenin
QPSQLNPQAQGSVQPQQLPQFAEIRNL	alpha-gliadin			QQLNPCKVF	LMW-glutenin	AQGQQGQQLAQGQQGQQP	HMW-glutenin			GQGQQLGQW	HMW-glutenin
QPSQQNPQAQGF	alpha-gliadin			SIILQEQQQVQ	LMW-glutenin	AQGQQGQQLAQGQQGQQPAQVQQGQRP	HMW-glutenin			GQGQQLGQWLQ	HMW-glutenin
QQHNIAHESSQVLQQSSY	alpha-gliadin			SIVLQEQQHGQGF	LMW-glutenin	AQGQQGYYP	HMW-glutenin			GQGQQSGQGQQGYYP	HMW-glutenin
QQHNIAHGSSQVLQESTY	alpha-gliadin			SIVLQEQQHGQGL	LMW-glutenin	ASLQQVGQGQQIGQLGQRQQP	HMW-glutenin			GQGQQTRQGQQLEQGQQP	HMW-glutenin
QQPNIAHASSQVSQQSY	alpha-gliadin			VQQQIPIVQPSVL	LMW-glutenin	EQWQQSGQGQPGHYP	HMW-glutenin			GQWQLVYYPTPPQQPGQLQQPAQGQQGYYPTSP	HMW-glutenin
QQPQEQYPSGQGSF	alpha-gliadin			VQQQLPVVQPSIL	LMW-glutenin	GQEQQGYDSPYHVSA	HMW-glutenin			GQWQQSGQGQQGYYP	HMW-glutenin
QQPQQQYPLGQGSF	alpha-gliadin					GQGHQSGQGQQGYYP	HMW-glutenin			LHQQGGGFGGGLTTEQP	HMW-glutenin
QQPQQQYPSGQGF	alpha-gliadin					GQGKQLGQGQQGYYP	HMW-glutenin			QGQQIGQLGQRQQP	HMW-glutenin
QQPQQQYPSGQGSF	alpha-gliadin					GQGLQGHYP	HMW-glutenin			QIGQLGQRQQP	HMW-glutenin
QQPQQQYPSGQGSFQPSQQN	alpha-gliadin					GQGQQAYYPTSSQQSRQRQ	HMW-glutenin			QQLGQGQSGYYP	HMW-glutenin
QQPQQQYPSGQGSFQPSQQNPQAQGF	alpha-gliadin					GQGQQGQQLGQGQQGQQP	HMW-glutenin			QQSGQGQQGYDSPYHVS	HMW-glutenin
QQPQQQYPSSQV	alpha-gliadin					GQGQQGYASPYHVS	HMW-glutenin			QQVGQGQQIGQLGQRQQ	HMW-glutenin
QQPQQQYPSSQVSF	alpha-gliadin					GQGQQGYYPTSP	HMW-glutenin			QQVGQGQQIGQLGQRQQP	HMW-glutenin
QQPYPRPQPQYPQ	alpha-gliadin					GQGQQGYYPTSPQQP	HMW-glutenin			QVGQGQQIGQLGQRQQP	HMW-glutenin
QQQAQQQQQQQQQQQQIL	alpha-gliadin					GQGQQGYYSSSLQQP	HMW-glutenin			RQWQQSGQGQQGHYP	HMW-glutenin
QQQLIPCMDVVLQQH	alpha-gliadin					GQGQQIGKGQQGYY	HMW-glutenin			TSLQQLGQGQQTGQP	HMW-glutenin
QQQLIPCRDVVLQ	alpha-gliadin					GQGQQIGKGQQGYYP	HMW-glutenin			TSLQQLGQGQSGYYP	HMW-glutenin
QQQLIPCRDVVLQQ	alpha-gliadin					GQGQQIGQGKQGYYP	HMW-glutenin			YDNPYHVNTEQQTA	HMW-glutenin
QQQLIPCRDVVLQQH	alpha-gliadin					GQGQQIGQGKQGYYPT	HMW-glutenin			YDSPYHVSAEHQ	HMW-glutenin
QQQLIPCRDVVLQQPN	alpha-gliadin					GQGQQIGQGQQGYY	HMW-glutenin			IVLQEQQHGQGLNQP	LMW-glutenin
QQQPSSQVSY	alpha-gliadin					GQGQQIGQGQQGYYP	HMW-glutenin			LFSQQQQLFPQQP	LMW-glutenin
QQQQLIPC	alpha-gliadin					GQGQQIGQGQQGYYPTSPQHP	HMW-glutenin			QSIIQYQQQQP	LMW-glutenin
QQQQLIPCRDVVLQ	alpha-gliadin					GQGQQIGQGQQGYYPTSPQQP	HMW-glutenin			SIVLQEQQHGQGFNQP	LMW-glutenin
QQQQPSSQVSY	alpha-gliadin					GQGQQIGQVQQP	HMW-glutenin			EQIISQQP	omega-gliadin
QQQQQQPSSQVSY	alpha-gliadin					GQGQQLGQGQPGYYP	HMW-glutenin
QQQQQQQEQQIL	alpha-gliadin					GQGQQLGQWLQPGQGQQGYYP	HMW-glutenin
QQQQQQQQEQQIL	alpha-gliadin					GQGQQLRQGQQGQQSGQGQPRY	HMW-glutenin
QQQQQQQQPSSQVSY	alpha-gliadin					GQGQQQGQGQQGYYP	HMW-glutenin
QQQQQQQQQEQQIL	alpha-gliadin					GQGQQSGQGQQGYYPTSPQQSGQGQQP	HMW-glutenin
QQQQQQQQQLI	alpha-gliadin					GQGQQTRQGQQLEQGQQP	HMW-glutenin
QQQQQQQQQPSSQVSY	alpha-gliadin					GQGQSGYYPTSPQQSGQKQP	HMW-glutenin
QQQQQQQQQQII	alpha-gliadin					QGQQGQQPERGQQGQQSGQGQQLGQGQQGQQP	HMW-glutenin
QQQQQQQQQQPSSQVSY	alpha-gliadin					QQVGQGQQIGQLGQRQQP	HMW-glutenin
QQQQQQQQQQQIL	alpha-gliadin					QVGQGQQIGQLGQRQQP	HMW-glutenin
QQQQQQQQQQQQLL	alpha-gliadin					RQWQQSGQGQQGHYP	HMW-glutenin
QQQQQQQQQQQQPSSQVSF	alpha-gliadin					SVTSSQQGSYYPGQASP	HMW-glutenin
QQQQQQQQQQQQQLL	alpha-gliadin					TSLHQSGQGQQGYYP	HMW-glutenin
QQQQQQQQQQQQQQLI	alpha-gliadin					TSLQQLGQGQQTGQP	HMW-glutenin
QQQQQQQQQQQQQQPSSQVSY	alpha-gliadin					TSLQQLGQGQSGYYPTSPQQP	HMW-glutenin
QQQQQQQQQQQQQQQII	alpha-gliadin					TSSQQSGQGHQSGQGQQGYYP	HMW-glutenin
QQQQQQQQQQQQQQQQLL	alpha-gliadin					FLQQQRPP	LMW-glutenin
QQQRQQPSSQVSF	alpha-gliadin					FSQQQQPPFSQQQQP	LMW-glutenin
QQRQQPSSQVSF	alpha-gliadin					ILWYHQQQP	LMW-glutenin
QQYPLGQGSF	alpha-gliadin					LFSQQQQLFPQQP	LMW-glutenin
QQYPSGQGSF	alpha-gliadin					EQIISQQPQQP	omega-gliadin
RPQQPYPQPQPQ	alpha-gliadin					EQIISQQRQQP	omega-gliadin
RPQQPYPQPQPQY	alpha-gliadin					EQSEQIISQQRQQP	omega-gliadin
RPQQSYPQPQPQY	alpha-gliadin					TPQQQFSQQSQQP	omega-gliadin
SFPPQQPYPQQQPQ	alpha-gliadin					QQLEQTISQQPQQP	omega-gliadin
SQPQHPISQQQQQQQQQQQQEQQIL	alpha-gliadin
SQPQQPISQQQQQQQQQQQQQIL	alpha-gliadin
VQPQHLPQLEEISNL	alpha-gliadin
VQPQQIPQFEEIRNL	alpha-gliadin
VQPQQLPQFEE	alpha-gliadin
VQPQQLPQFQEIRNL	alpha-gliadin
VQQQQFPGQQQ	alpha-gliadin
VRVPVPQLQ	alpha-gliadin
VTVPVPQLQPQNPSQQQPQ	alpha-gliadin
VYIPPYCST	alpha-gliadin
XGQQQPFPPQQPYPQPQPFPSQQPY	alpha-gliadin
YLQPQQPISQQ	alpha-gliadin
YLQPQQPISQQQ	alpha-gliadin
YLQPQQPISQQQAQ	alpha-gliadin
YLQPQQPISQQQAQQ	alpha-gliadin
YLQPQQPISQQQAQQQ	alpha-gliadin
YLQPQQPISQQQAQQQQ	alpha-gliadin
YSQPQQPISQQ	alpha-gliadin
YSQPQQPISQQQQQQQQQQQQ	alpha-gliadin
YSQPQQPISQQQQQQQQQQQQQIL	alpha-gliadin
AQISEQARCQAVC	avenin
GQQQQQQLQEQLTPCTTF	avenin
LQTQVEQL	avenin
LQTQVEQLSSCQIVQY	avenin
SQPQHQVPIEITRM	avenin
AIILQQQQQL	gamma-gliadin
AQLEAIRSL	gamma-gliadin
ASIVAGIGGQ	gamma-gliadin
CCQELAQIPQQL	gamma-gliadin
FQLVQGQGIIQPQQPAQL	gamma-gliadin
GIIQPQQPAQL	gamma-gliadin
GPSGQVQWPQQQPF	gamma-gliadin
GQGIIQPQQPAQL	gamma-gliadin
GQGTLVQGQGIIQPQQL	gamma-gliadin
GSLVQGQGIIQPQQPAQL	gamma-gliadin
HQPQQQFPQPQQPQQSFPQ	gamma-gliadin
IQGQGIIQPQQPAQL	gamma-gliadin
IQPQQPFPQQPQQTY	gamma-gliadin
IQPSLQQQLNPC	gamma-gliadin
KTLPTMCNVY	gamma-gliadin
LCNVHVPSDCY	gamma-gliadin
LLQQCKPVSL	gamma-gliadin
LQPQHTFPLQPQ	gamma-gliadin
LQPQQAFPQQPQQPFPQ	gamma-gliadin
LQPRQPFPQQPQQPY	gamma-gliadin
LQQQLVPQLQQPL	gamma-gliadin
LQQQMNPCKNF	gamma-gliadin
NIQVDPSGQVQW	gamma-gliadin
PHQPQQQFPQPQQPQQQF	gamma-gliadin
PQQPQQPFPQTQQPQ	gamma-gliadin
PQQPQQPYPQQPQQPFPQ	gamma-gliadin
PQQPRLPFPQQPQ	gamma-gliadin
PQQQFLQAQQPQ	gamma-gliadin
PSGQVQWPQ	gamma-gliadin
QAFPQQPQQPFPQ	gamma-gliadin
QIFPQPQQTFPHQPQ	gamma-gliadin
QIQCAALH	gamma-gliadin
QLAQIPQQL	gamma-gliadin
QLFPQSQQPQQQF	gamma-gliadin
QLIQGQGIIQPQQPAQL	gamma-gliadin
QLVPQLQQPL	gamma-gliadin
QLVQGQGIIQPQQPAQL	gamma-gliadin
QLVQGQGIIQPQQPAQY	gamma-gliadin
QQFPQPQQPQQQF	gamma-gliadin
QQFPQPQQPQQSFPQQQRPF	gamma-gliadin
QQLAQIPQQL	gamma-gliadin
QQLPQPQQPQQSFPQQQRPF	gamma-gliadin
QQLVPQPQQPL	gamma-gliadin
QQPFPQPQQPF	gamma-gliadin
QQPQLPFPQQPQQPFPQ	gamma-gliadin
QQPQQPFLQQPQQQF	gamma-gliadin
QQQCCQELAQIPQQL	gamma-gliadin
QQQLNPCKNF	gamma-gliadin
QQVPQPQQPQQPF	gamma-gliadin
QSFPQQQPSLIQQSL	gamma-gliadin
QSFPQQQRPF	gamma-gliadin
QTFPHQPQQQVPQPQQPQQPF	gamma-gliadin
QTFPQPQQTY	gamma-gliadin
RTIPQPHQTF	gamma-gliadin
SIIMQQEQQEQL	gamma-gliadin
SIIMQQEQQEQLQGVQ	gamma-gliadin
SIIMQQEQQQQQGIQ	gamma-gliadin
SIIMQQEQRQGV	gamma-gliadin
SIIVQQQQQQQ	gamma-gliadin
SIIVQQQQQQQQ	gamma-gliadin
SIIVQQQQQQQQQQ	gamma-gliadin
SIIVQQQQQQQQQQQ	gamma-gliadin
SIIWPQSDCQVM	gamma-gliadin
SLILPPSDCQVM	gamma-gliadin
SLQQQMNPCKNF	gamma-gliadin
SQQPQQAFPQPQ	gamma-gliadin
SQQPQQIFPQPQ	gamma-gliadin
SQQPQQPFPQPQQQF	gamma-gliadin
SQQPQQTFPQPQQTF	gamma-gliadin
SQQPQQTFPQPQQTFPHQPQ	gamma-gliadin
SQQQQLGQGTL	gamma-gliadin
SQQQQVGQGIL	gamma-gliadin
SQQQQVGQGILVQ	gamma-gliadin
SQQQQVGQGSL	gamma-gliadin
SQQQQVGQGSLVQ	gamma-gliadin
SQQQQVGQGSLVQGQ	gamma-gliadin
SQQQQVGQGSLVQGQGIIQPQQPAQL	gamma-gliadin
SQQQQVGQGTL	gamma-gliadin
TQQPQQPFPQQPQQPFPQ	gamma-gliadin
VFVPPECSTTKAPF	gamma-gliadin
VLKTLPTM	gamma-gliadin
VLQTLPSMCN	gamma-gliadin
VLRTLPNMCNVY	gamma-gliadin
VQGQGIIQPQQL	gamma-gliadin
VQGQGIIQPQQPAQL	gamma-gliadin
VRPDCSTINAPF	gamma-gliadin
VSPDCSTINAPFAN	gamma-gliadin
YQQPQQTFPQPQ	gamma-gliadin
YQQQQVGQGTL	gamma-gliadin
GYYPSVSSPQQGPY	HMW-glutenin
LTSPQQSGQGQQPGQL	HMW-glutenin
QQPGQGQQIGQGQQGY	HMW-glutenin
RLEGGDALLASQ	HMW-glutenin
RLEGGDALSASQ	HMW-glutenin
SLQQPGQGQQGYYPTSL	HMW-glutenin
SLQQTGQGQQSGQGQQGYY	HMW-glutenin
TASLQQPGQGQQGHYPASL	HMW-glutenin
WQPGQGQQGY	HMW-glutenin
YPGQASPQQPGQGQQPGKW	HMW-glutenin
YPTSPQQSGQGQQL	HMW-glutenin
CCQQLPQIPQ	LMW-glutenin
CCQQLPQIPQQSRY	LMW-glutenin
CQQLPQIPQQSRY	LMW-glutenin
CVSQPQQQSQQQL	LMW-glutenin
GQCVSQPQQQLQQQL	LMW-glutenin
GQCVSQPQQQSQQQL	LMW-glutenin
LQPHQIAQLEVM	LMW-glutenin
LQPHQISQLEVM	LMW-glutenin
LQQQCIPVAM	LMW-glutenin
QLGQCVSQPQQQSQQQL	LMW-glutenin
QQLGQQPQQQQL	LMW-glutenin
QQLNPCKVF	LMW-glutenin
QQQPLPPQQTFPQQPL	LMW-glutenin
QSVQGVSQPQQQQKQL	LMW-glutenin
SIILQEQQQVQ	LMW-glutenin
SIILQEQQQVQGSIQ	LMW-glutenin
SIILQQQQQQQ	LMW-glutenin
SIILQQQQQQQQQ	LMW-glutenin
SIVLQEQQHGQ	LMW-glutenin
SIVLQEQQHGQGF	LMW-glutenin
SIVLQEQQHGQGL	LMW-glutenin
SLLLQQQQQQQQ	LMW-glutenin
SQQQQIPVIHPSVL	LMW-glutenin
SQQQQPVLPQQPPF	LMW-glutenin
SQQQQPVLPQQQPV	LMW-glutenin
SQQQQQPLLPQQPPF	LMW-glutenin
VQQQLPVVQPSIL	LMW-glutenin
ARELNPSNKELQSPQQSF	omega-gliadin
GSSLTSIGGQ	omega-gliadin
HQQPEQIISQQPQQPF	omega-gliadin
ILQPQQPLPQQPQQPF	omega-gliadin
IQPQQPLPQQAEQ	omega-gliadin
KQFPQPQQIPQ	omega-gliadin
LLGPQQPFPQQPQQSQQ	omega-gliadin
LQQPQQPFPQPQQVVQ	omega-gliadin
LQQPQQPSPQPQQVVQ	omega-gliadin
PLQPQQPFPQQSAQ	omega-gliadin
PLRPQQPFPQQPQQSQQ	omega-gliadin
PQQQFHQQQFPQQQFPQQQ	omega-gliadin
PQQQLPLQPQQP	omega-gliadin
PSQQPFPTPQQQF	omega-gliadin
PSQQPFPTPQQQFPEQSQQPF	omega-gliadin
PSQQPYPSQQPFPTPQQQF	omega-gliadin
QPQQPLPQQPQQPF	omega-gliadin
QQIPQQQIPQQQFPQ	omega-gliadin
QQYPQQQPSGSDVISISG	omega-gliadin
QSQQPFPQQPKQPQQSF	omega-gliadin
QVVQIIPQQPQQPFPL	omega-gliadin
SQQPFPQPQQL	omega-gliadin
SSQQPFPTIQQQF	omega-gliadin
ELQSPQQSF	omega-gliadin
FPQQQQFPQQQ	omega-gliadin
HTPQEQFPQQQ	omega-gliadin
KELQSPQQSF	omega-gliadin
LLESQQPFPQQPQQPF	omega-gliadin
LQQQQFPQQQPPQQH	omega-gliadin
QQFPQQQFPQQQ	omega-gliadin
QQQIPQQPQQF	omega-gliadin
SFPQPQPQQPQQPS	omega-gliadin
SHQQQPFPQQPY	omega-gliadin
SHQQQPFPQQPYPQQPY	omega-gliadin

## Sheet: Supp Table 4
Supplementary Table 4. Database of 465 known immunogenic sequences with their associated gluten protein class. The 51 known immunogenic sequences which are not present in the publicly available UniProt database are listed at the bottom of the table in gray.
Immunopathogenic Sequence	Gluten Protein Class
AMCNVYIPPYCAMAPFGIFG	alpha-gliadin
FLGQQQPFPPQQPYPQPQ	alpha-gliadin
FPGQQQPFPPQQPYPQPQPF	alpha-gliadin
FPGQQQQFPPQQPYPQPQPF	alpha-gliadin
FRPQQPYPQ	alpha-gliadin
GQGSFQPSQ	alpha-gliadin
GSFQPSQQNPQAQGS	alpha-gliadin
LGQGSFRPSQQN	alpha-gliadin
LGQQQPFPPQQPY	alpha-gliadin
LGQQQPFPPQQPYPQPQ	alpha-gliadin
LGQQQPFPPQQPYPQPQPF	alpha-gliadin
LGQQQPFPPQQPYPQPQPFPSQQPY	alpha-gliadin
LPYPQPQLPYPQ	alpha-gliadin
LQLQPFPQPQLPY	alpha-gliadin
LQLQPFPQPQLPYLQPQPFR	alpha-gliadin
LQLQPFPQPQLPYPQPQLPY	alpha-gliadin
LQLQPFPQPQLPYPQPQLPYPQPQLPYPQPQPF	alpha-gliadin
LQLQPFPQPQLPYPQPQPFR	alpha-gliadin
LQLQPFPQPQLPYSQPQPFR	alpha-gliadin
LQPFPQPQLPY	alpha-gliadin
LQPFPQPQLPYPQPQ	alpha-gliadin
LQPFPQPQLPYSQPQ	alpha-gliadin
LQPFPQPQPFLPQLPYPQPQ	alpha-gliadin
MQLQPFPQPQLPYPQPQLPY	alpha-gliadin
PFPQPQLPY	alpha-gliadin
PFPQPQLPYPQ	alpha-gliadin
PFPQPQLPYPQPQLP	alpha-gliadin
PFPQPQLPYSQ	alpha-gliadin
PFPQPQLPYTH	alpha-gliadin
PFRPQQPYPQPQPQ	alpha-gliadin
PPYCTIVPFGIFGTNYR	alpha-gliadin
PQLPYPQPQLPY	alpha-gliadin
PQLPYPQPQLPYPQPQLPYP	alpha-gliadin
PQLPYPQPQLPYPQPQPFRP	alpha-gliadin
PQPFLPQLPYPQ	alpha-gliadin
PQPFRPQQPYPQPQPQ	alpha-gliadin
PQPQLPYPQ	alpha-gliadin
PQPQLPYPQPQ	alpha-gliadin
PQPQLPYPQPQL	alpha-gliadin
PQPQLPYPQPQLPY	alpha-gliadin
PQPQPFLPQLPYPQPQS	alpha-gliadin
PQPQPFPPQLPYPQPQS	alpha-gliadin
PQPQPFPSQQPY	alpha-gliadin
PQQPYPQPQPQ	alpha-gliadin
PSGQGSFQPSQ	alpha-gliadin
PSGQGSFQPSQQ	alpha-gliadin
PSGQGSFQPSQQNPQAQG	alpha-gliadin
PYPQPQLPY	alpha-gliadin
QAQGSVQPQQLPQFE	alpha-gliadin
QFLGQQQPFPPQQPYPQPQ	alpha-gliadin
QGSFQPSQQ	alpha-gliadin
QLIPCMDVVL	alpha-gliadin
QLPYPQPQLPYPQ	alpha-gliadin
QLPYPQPQLPYPQPQ	alpha-gliadin
QLQPFPQPQLPY	alpha-gliadin
QLQPFPQPQLPYLQP	alpha-gliadin
QLQPFPQPQLPYPQ	alpha-gliadin
QLQPFPQPQLPYPQP	alpha-gliadin
QLQPFPQPQLPYPQPQ	alpha-gliadin
QLQPFPQPQLPYPQPQP	alpha-gliadin
QLQPFPQPQLPYPQPQS	alpha-gliadin
QLQPFPQPQLPYSQP	alpha-gliadin
QLQPFPQPQLPYTHP	alpha-gliadin
QLRPFPQPQLPYPQP	alpha-gliadin
QNPSQQQPQEQVPLVQQQ	alpha-gliadin
QPFPQPQLPY	alpha-gliadin
QPFPQPQLPYLQ	alpha-gliadin
QPFPQPQLPYPQ	alpha-gliadin
QPFPQPQLPYPQPQLPY	alpha-gliadin
QPFPQPQLPYSQ	alpha-gliadin
QPQLPYPQPQLPYPQ	alpha-gliadin
QPQPFLPQLPYPQP	alpha-gliadin
QPQQQYPSGQGSFQPSQQNP	alpha-gliadin
QPYPQPQPFPSQQPYLQL	alpha-gliadin
QQPQQQYPSGQGSFQPSQQNPQAQ	alpha-gliadin
QQPQQQYPSGQGSFQPSQQNPQAQG	alpha-gliadin
QQYPLGQGSFRPSQQNPQA	alpha-gliadin
QQYPSGQGSFQPSQQNPQ	alpha-gliadin
QVPLVQQQQFLGQQQPFPPQ	alpha-gliadin
QYPSGQGSFQPSQQNPQA	alpha-gliadin
SGQGSFQPSQQN	alpha-gliadin
SQQPYLQLQPFPQPQLPYSQ	alpha-gliadin
VAHAIIMHQQQQQQQE	alpha-gliadin
VAHAIIMHQQQQQQQEQKQQ	alpha-gliadin
VPVPQLQPQNPSQQQPQEQVPL	alpha-gliadin
VQQQQFPGQQQPFPPQQPYPQPQPFPSQQPY	alpha-gliadin
VRVPVPQLQPQNPSQQQPQ	alpha-gliadin
VRVPVPQLQPQNPSQQQPQEQVPLVQQQQF	alpha-gliadin
VRVPVPQLQPQNPSQQQPQEQVPLVQQQQFLGQQQPFPPQQPYPQPQPFPSQQPY	alpha-gliadin
VYIPPYCTIAPFGIFGTNYR	alpha-gliadin
YLQLQPFPQPQLPYP	alpha-gliadin
YLQLQPFPQPQLPYPQPQLP	alpha-gliadin
YPQPQLPYPQPQPFR	alpha-gliadin
YPQPQLPYPQPQPFRP	alpha-gliadin
YPSGQGSFQPSQQNP	alpha-gliadin
ATANMQVDPSGQVQWPQQQP	gamma-gliadin
CKVFLQQQCSPVAMPQRLAR	gamma-gliadin
FLQPQQPFPQQPQQPYPQQPQQPFPQ	gamma-gliadin
FPQPQQQFPQPQ	gamma-gliadin
FPQQPQQPF	gamma-gliadin
FPQQPQQPYPQQ	gamma-gliadin
FPQQPQQPYPQQP	gamma-gliadin
FPQQPQQPYPQQPQQ	gamma-gliadin
FSQPQQQFPQ	gamma-gliadin
FSQPQQQFPQPQ	gamma-gliadin
FSQQQQQPL	gamma-gliadin
GIIQPQQPAQL	gamma-gliadin
HQPQQTFPQPQQTYPHQPQQ	gamma-gliadin
IHSVAHSIIMQQEQQQGVPI	gamma-gliadin
IIQPQQPAQ	gamma-gliadin
IIQPQQPAQL	gamma-gliadin
IQPQQPAQL	gamma-gliadin
LGIIQPQQPAQLEGIRSLVL	gamma-gliadin
LQPQQPFPQQPQQPYPQQPQ	gamma-gliadin
LQQQCSPVAMPQRLAR	gamma-gliadin
LRPLFQLAQGLGIIQPQQPA	gamma-gliadin
PFPQLQQPQQPFPQ	gamma-gliadin
PFPQPQQPQQPFPQ	gamma-gliadin
PFPQPQQTFPQ	gamma-gliadin
PFPQPQQTFPQQPQLPFPQQ	gamma-gliadin
PFPQQPQQPF	gamma-gliadin
PFPQQPQQPYPQ	gamma-gliadin
PFPQQPQQPYPQQPQ	gamma-gliadin
PFPQQPQQQFPQ	gamma-gliadin
PFPQSQQPQQPFPQ	gamma-gliadin
PFPQTQQPQQPFPQ	gamma-gliadin
PFSQQQQPV	gamma-gliadin
PFSQQQQQ	gamma-gliadin
PHQPQQQVPQPQQPQQPF	gamma-gliadin
PQPFPPQLPYPQPQLPYPQP	gamma-gliadin
PQPQQPFCQ	gamma-gliadin
PQPQQPQLPFPQQPQQPFPQ	gamma-gliadin
PQPQQQFPQ	gamma-gliadin
PQQPFPQPQQPQQPFPQSQQ	gamma-gliadin
PQQPFPQPQQQFPQPQQPQQ	gamma-gliadin
PQQPFPQPQQTFPQQPQLPF	gamma-gliadin
PQQPFPQQPQQ	gamma-gliadin
PQQPFPQQPQQPY	gamma-gliadin
PQQPFPQQPQQPYPQQP	gamma-gliadin
PQQPFPQQPQQQFPQPQQPQ	gamma-gliadin
PQQPFPQSQQPQQPFPQPQQ	gamma-gliadin
PQQPQQSFPQQQQPA	gamma-gliadin
PQQPQQSFPQQQRP	gamma-gliadin
PQQPQQSFPQQQRPF	gamma-gliadin
PQQQQPFPQPQQPFSQQPQQ	gamma-gliadin
PQQSFPQQQ	gamma-gliadin
PQQTFPQQPQLP	gamma-gliadin
PYPQQPQQP	gamma-gliadin
QFPQPQQPQQSFPQQQQPAI	gamma-gliadin
QFPQTQQPQQPFPQ	gamma-gliadin
QFPQTQQPQQPFPQPQQTFP	gamma-gliadin
QFSQPQQQFPQPQ	gamma-gliadin
QLPFPQQPQQPFPQ	gamma-gliadin
QPFPQLQQPQQP	gamma-gliadin
QPFPQLQQPQQPLPQPQQPQ	gamma-gliadin
QPFPQPQQPFCQ	gamma-gliadin
QPFPQPQQPFSQ	gamma-gliadin
QPFPQPQQPQLP	gamma-gliadin
QPFPQPQQPQLPFPQ	gamma-gliadin
QPQQPQQPFPQQQQPLIQPY	gamma-gliadin
QPQQPQQSFPQQQRPF	gamma-gliadin
QPQQPQQSFPQQQRPFI	gamma-gliadin
QPQQSFPQQQ	gamma-gliadin
QPQQSFPQQQRP	gamma-gliadin
QQFIQPQQPFPQ	gamma-gliadin
QQFLQPQQPFPQQPQQP	gamma-gliadin
QQFLQPQQPFPQQPQQPYPQ	gamma-gliadin
QQFSQPQQQFPQ	gamma-gliadin
QQFSQPQQQFPQPQQ	gamma-gliadin
QQPAQYEVIRSLVLRTLPNM	gamma-gliadin
QQPFCQQPQRTIPQPHQTFH	gamma-gliadin
QQPFPQPQQPQLPFPQQPQQ	gamma-gliadin
QQPFPQQPQ	gamma-gliadin
QQPFPQQPQQPFPQ	gamma-gliadin
QQPFPQQPQQPYPQ	gamma-gliadin
QQPFPQQPQQPYPQQPQQPFPQP	gamma-gliadin
QQPLPQPQQPQQPFPQSQQP	gamma-gliadin
QQPPFSQQQQPVLPQ	gamma-gliadin
QQPPFSQQQQQPLPQ	gamma-gliadin
QQPQLPFPQQPQQPFPQPQQ	gamma-gliadin
QQPQQPFPQ	gamma-gliadin
QQPQQPYPQ	gamma-gliadin
QQPQQSFPQQQ	gamma-gliadin
QQPYPQQPQ	gamma-gliadin
QQPYPQQPQQPFPQ	gamma-gliadin
QQQFIQPQQPFPQQPQQTYP	gamma-gliadin
QQSFPQQQRPFIQPSL	gamma-gliadin
QQTYPHQPQQQFPQTQQPQQ	gamma-gliadin
QSFLQQQMNPCKNFLLQQCN	gamma-gliadin
QVDPSGQVQWPQ	gamma-gliadin
QYEVIRSLVLRTLPNM	gamma-gliadin
SFPQQQQPAIQSFLQQQMNP	gamma-gliadin
SQPQQQFPQ	gamma-gliadin
SQPQQQFPQPQQ	gamma-gliadin
SQQPQQPFPQPQQQFPQPQQ	gamma-gliadin
SQQPQQQFSQPQQQFPQPQQ	gamma-gliadin
TIPQPHQTFHHQPQQTFPQP	gamma-gliadin
TQQPQQPFPQP	gamma-gliadin
VQGQGIIQPQQPAQL	gamma-gliadin
WPQQQPFPQPQQPFCQQPQQ	gamma-gliadin
WPQQQPFPQPQQPFCQQPQR	gamma-gliadin
FPELQQPIPQQPQQPFPLQP	omega-gliadin
FPQQPQQPFPQPQLPFPQQS	omega-gliadin
PFPLQPQQPFPQ	omega-gliadin
PFPQPQQPIPV	omega-gliadin
PFPQQPQQPFPQ	omega-gliadin
PFPQQPQQPFPQQPQQSFPQ	omega-gliadin
PFPWQPQQPFPQ	omega-gliadin
PFTQPQQPTPI	omega-gliadin
PFTQPQQPTPIQPQQPFPQQ	omega-gliadin
PIPQQPQQPFPL	omega-gliadin
PLQPQQPFPQQPQQPFPQPQ	omega-gliadin
PQPQQPFPW	omega-gliadin
PQQPFPQPQQPFPWQ	omega-gliadin
PQQPFPQQ	omega-gliadin
PQQPFPQQPQQP	omega-gliadin
PQQPQQPFPLQPQQPFPQQP	omega-gliadin
PQQPQQPFPQPQQPF	omega-gliadin
PQQPQQPFPQPQQPFPWQPQ	omega-gliadin
PQQPQQPFPQPQQPIPVQPQ	omega-gliadin
PQQPQQPQQPFPQPQQPFPW	omega-gliadin
QPFPQPQLPFPQ	omega-gliadin
QPFPQPQQPFPW	omega-gliadin
QPFPQPQQPFPWQPQQPFPQ	omega-gliadin
QPQQPFPQPQQPFPW	omega-gliadin
QPQQPFPQPQQPFPWQP	omega-gliadin
QPQQPIPVQPQQSFPQQSQQ	omega-gliadin
QQPFPQPQQPFPWQP	omega-gliadin
QQPFPQQPQQPFPQPQQPIP	omega-gliadin
QQPQQPFPQPQLPFPQQSEQ	omega-gliadin
QQPQQPFPQPQQPFP	omega-gliadin
TPIQPQQPFPQ	omega-gliadin
TPIQPQQPFPQQPQQPQQPF	omega-gliadin
QIPQQPQQF	omega-gliadin/LMW glutenin
QIPQQQQIPQQPQQF	omega-gliadin/LMW glutenin
QQQIPQQPQQF	omega-gliadin/LMW glutenin
QQQQIPQQPQQF	omega-gliadin/LMW glutenin
FSQQQQSPF	LMW glutenin
LERPWQQQPLPP	LMW glutenin
PFSQQQQSPF	LMW glutenin
PFSQQQQSPFSQQQQ	LMW glutenin
PPFSQQQQSPFSQQQ	LMW glutenin
QAFPQPQQTFPH	LMW glutenin
QAFPQPQQTFPHQPQQQFPQ	LMW glutenin
QPPFSQQQQPILPQ	LMW glutenin
QPPFSQQQQQPILL	LMW glutenin
QPPFSQQQQSPFSQ	LMW glutenin
QQAFPQPQQTFPHQP	LMW glutenin
QQPPFSQQQQPILPQ	LMW glutenin
QQPPFSQQQQPPFSQ	LMW glutenin
QQPPFSQQQQPQFSQ	LMW glutenin
QQPPFSQQQQQPILL	LMW glutenin
QQPPFSQQQQSP	LMW glutenin
QQPPFSQQQQSPFSQ	LMW glutenin
QQQQPPFSQQQQSPFSQQQQ	LMW glutenin
SHIPGLERPWQQQPLPPQQT	LMW glutenin
SHQQQPFPQQPYPQQPYPS	LMW glutenin
GQAGYYPTSPQQSGQ	HMW glutenin
GQGQSGYYPTSPQQSG	HMW glutenin
GQGQSGYYPTSPQQSGQEAT	HMW glutenin
GQHGYYPTSPQLSGQ	HMW glutenin
GQLGYYPTSPQQSGQ	HMW glutenin
GQPGYYPTSPLQSGQ	HMW glutenin
GQPGYYPTSPQQIGQ	HMW glutenin
GQPGYYPTSPQQPGQ	HMW glutenin
GQPGYYPTSPQQSGQ	HMW glutenin
GQQGYYPISPQQLGQ	HMW glutenin
GQQGYYPISPQQPGQ	HMW glutenin
GQQGYYPISPQQSGQ	HMW glutenin
GQQGYYPTSLQQPGQ	HMW glutenin
GQQGYYPTSPQHPGQ	HMW glutenin
GQQGYYPTSPQQLGQ	HMW glutenin
GQQGYYPTSPQQPGQ	HMW glutenin
GQQGYYPTSPQQS	HMW glutenin
GQQGYYPTSPQQSG	HMW glutenin
GQQGYYPTSPQQSGQ	HMW glutenin
GQQGYYPTSVQQPGQ	HMW glutenin
GQSGYYPTSPQQSGQ	HMW glutenin
GYYPTSPQQSG	HMW glutenin
LQPGQGQPGYYPTSPQQIGQ	HMW glutenin
PGQGQQGYYPTSPQQSGQ	HMW glutenin
PGQGQSGYYPTSPQQS	HMW glutenin
PGQGQSGYYPTSPQQSGQKQ	HMW glutenin
QGQPGYYPTSPQQIGQ	HMW glutenin
QGQQGYYPISPQQSGQ	HMW glutenin
QGQQGYYPISPQQSGQGQQP	HMW glutenin
QGYYPTSPQ	HMW glutenin
QGYYPTSPQQS	HMW glutenin
QGYYPTSPQQSG	HMW glutenin
QQGYYPTSPQQS	HMW glutenin
QQGYYPTSPQQSG	HMW glutenin
QQGYYPTSPQQSGQ	HMW glutenin
SGQGQRPGQWLQPGQGQQGYYPTSPQQSGQGQQLGQ	HMW glutenin
FPPQQPFPQ	Hordein
FQQPQQSYPVQPQQPFPQPQ	Hordein
LPRPQQPFPWQPQQPFPQPQ	Hordein
NPLQPQQPFPLQPQPP	Hordein
NPLQPQQPFPLQPQPPQQPF	Hordein
PFPLQPQQPFPW	Hordein
PFPQPQQPF	Hordein
PFPQQPQQPFPQPQQPFRQQ	Hordein
PIPQQPQPY	Hordein
PLQPQQPFPLQPQPPQ	Hordein
PNPLQPQQPFPLQ	Hordein
PQPFPQQPIPQQPQPY	Hordein
PQPFPQQPIPQQPQPYPQQP	Hordein
PQPYPQQPQPFPQQPP	Hordein
PQPYPQQPQPFPQQPPFCQQ	Hordein
PQQPFPQPQQPFRQ	Hordein
PQQPFPQQPQPYPQQP	Hordein
PQQPFQPQQPFPQQTIPQQP	Hordein
PQQPQQPFPQPQQPFSWQPQ	Hordein
PQQPVPQQPQPY	Hordein
PQQTIPQQPQQPFPLQPQQP	Hordein
QPFPQPQQPFPL	Hordein
QPFPQPQQPFSW	Hordein
QPFPQPQQPIPY	Hordein
QPQPFPQQPIPL	Hordein
QPQPFPQQPIPLQPHQPYTQ	Hordein
QPQPFPQQPIPQ	Hordein
QPQPYPQQPQPY	Hordein
QPQPYPQQPQPYPQQPFQPQ	Hordein
QPQQPFPLQPQQPFPWQPQQ	Hordein
QPQQPFPQPQQPIPYQPQQP	Hordein
QPQQPFSFSQQPQQPFPLQP	Hordein
QQPFPLQPQQPFPQPQPFPQ	Hordein
QQPFPQPQQPFRQ	Hordein
QQPFPQQPFPQ	Hordein
QQPFPQQPFPQQPQPY	Hordein
QQPFPQQPFPQQPQPYPQQP	Hordein
QQPFPQQPIPQ	Hordein
QQPFQPQQPFPQ	Hordein
QQPQPFSQQPIPQQPQPYPQ	Hordein
QQQPFPQQPIPQQPQPYPQQ	Hordein
SFSQQPQQPFPL	Hordein
SQQPIPQQPQPY	Hordein
SYPVQPQQPFPQ	Hordein
TFPPSQQPNPLQPQQPFPLQ	Hordein
TIPQQPQQPFPL	Hordein
WQPQQPFPQPQQPFPLQPQQ	Hordein
YPQQPQPFPQQPIPQQPQPY	Hordein
PQPQQPFPQ	gamma-hordein
QQFPQPQQPFPQ	gamma-hordein
QQFPQPQQPFPQQP	gamma-hordein
QSQQQFPQPQQPFPQQPQQP	gamma-hordein
FPLQPQQPFPQQPEQIISQQ	Secalin
FPQQPEQIISQQPQQPFPLQ	Secalin
FPQQPQQPFPQPQQQLPLQP	Secalin
LFPLPQQPFPQ	Secalin
PAPIQPQQPFPQ	Secalin
PAPIQPQQPFPQQPQQPFPQ	Secalin
PEQIISQQPQQPFPL	Secalin
PFPQQPEQIISQ	Secalin
PFPQRPQQPFPQ	Secalin
PQQLFPLPQQPFPQPQQPFP	Secalin
PQQPFPQPQQPFPQ	Secalin
PQQSFPQQP	Secalin
PTPIQPQQPFPQRPQQPFPQ	Secalin
QPFPQPQQPFPQSQ	Secalin
QPFPQPQQQLPL	Secalin
NMQVGPSGQVEWPQQQPLPQ	gamma-secalin
PQEPQQLFPQSQQPQQPFPQ	gamma-secalin
PQQPYPQQPFPQ	gamma-secalin
PQSQQPQQPFPQ	gamma-secalin
PQTQQPQQPFPQ	gamma-secalin
PQTQQPQQPFPQPQQPQQLF	gamma-secalin
QPFPQPQQPFPQ	gamma-secalin
QSIPQPQQPFPQ	gamma-secalin
QTQQSIPQPQQPFPQPQQPF	gamma-secalin
QVGPSGQVEWPQ	gamma-secalin
SIPQPQQPFPQPQQPFPQSQ	gamma-secalin
SPQPQQPYPQQPFPQQPQQP	gamma-secalin
EQIISQQPFPLQPQQPFSQP	omega-secalin
FLLQPQQPFSQ	omega-secalin
IIPQQPQQPFPL	omega-secalin
LPFPQPQQPFVV	omega-secalin
PEQIIPQQPQQP	omega-secalin
PFPLQPQQPFSQ	omega-secalin
PQQPFPQQPEQI	omega-secalin
PQQPFPQQPEQIIPQQPQQP	omega-secalin
PQQPQQSFPQQPQR	omega-secalin
PTPIQPQQPFPQ	omega-secalin
QLPLQPQQPFPQ	omega-secalin
QPFPLQPQQPVPQQPQ	omega-secalin
QPFPQPQQPIPQ	omega-secalin
QPFPQPQQPTPI	omega-secalin
QPFPQPQQPTPIQPQQPFPQ	omega-secalin
QPQQIIPQQPQQPFPLQPQQ	omega-secalin
QQLPLQPQQPFPQPQQPIPQ	omega-secalin
QQPFLLQPQQPFSQPQQPFL	omega-secalin
QQPFPQQPEQIIPQQP	omega-secalin
QQPQQPFPLQPQQPVP	omega-secalin
QQPQQPFPLQPQQPVPQQPQ	omega-secalin
QYSPYQPQQPFPQPQQPTPI	omega-secalin
RPQQPFPQQPQQI	omega-secalin
SPQQPQLPFPQPQQPFVVVV	omega-secalin
SQQPQRPQQPFPQQPQQIIP	omega-secalin
YSPYQPQQPFPQ	omega-secalin
FVQQQQQPF	avenin
PSEQYQPYPEQQEPFVQQQQPFVQQQQPF	avenin
PYPEQQEPF	avenin
QQPFVQQQQPFVQQ	avenin
QYQPYPEQQEPFVQ	avenin
SEQYQPYPEQQEPFVQQQQ	avenin
TTTVQYDPSEQYQPYPEQQEPF	avenin
TTTVQYDPSEQYQPYPEQQEPFVQQQPPFVQ	avenin
TTTVQYDPSEQYQPYPEQQEPFVQQQQPF	avenin
TTTVQYNPSEQYQPYPEQQEPF	avenin
TTTVQYNPSEQYQPYPEQQEPFVQQQPF	avenin
TTTVQYNPSEQYQPYPEQQEPFVQQQQPFV	avenin
TTVQYNPSEQYQPYPEQQEPFVQQQPF	avenin
VQYNPSEQYQPYPEQQEPFVQQQPF	avenin
YQPYPEQQEPFV	avenin
PYPEQQQPF	gamma-avenin
AGQQQPFPPQQPYPQPQPF	alpha-gliadin
CPQLQPQNPSQQQPQEQG	alpha-gliadin
CPQPFPSQQPYLQLQG	alpha-gliadin
LGQQQAFPPQQPYPQPQPF	alpha-gliadin
LQLPFPQPQLPY	alpha-gliadin
LQPFPQSQLPYPQPQ	alpha-gliadin
LQPFPQSQLPYSQPQ	alpha-gliadin
PFPHPQLPYPQ	alpha-gliadin
PQLPQFLQPQPYPQPQLPYPQPQPF	alpha-gliadin
QLQPFPEPQLPY	alpha-gliadin
QLQPFPHPQLPYPHP	alpha-gliadin
QLQPFPQAQLPYPQP	alpha-gliadin
QLQPFPQPTLPYPQPQS	alpha-gliadin
QLQPFPQQQLPY	alpha-gliadin
QPQPYPQPQLPYPQPQPF	alpha-gliadin
VPVPQLQPQNPSQQQPQEQVPLVQQQQFGGQQQPFPPQQPYPQPQPFPSQQPY	alpha-gliadin
GQGIIQPQQPAQLIR	gamma-gliadin
PQQPFPSQQQQPLI	gamma-gliadin
PQQQTLQPQQPAQL	gamma-gliadin
QYQVIRSLVLRTLPN	gamma-gliadin
YQQLPQPQQPQQSFPQQQRPF	gamma-gliadin
QPQPFPQQSEQSQQPFQPQPF	gamma-gliadin/LMW glutenin
QQISQPQIPQQQQIPQQPQQF	gamma-gliadin/LMW glutenin
QQISQPQIPQQQQLPQQPQQF	gamma-gliadin/LMW glutenin
QQISQPQLPQQQQIPQQPQQF	gamma-gliadin/LMW glutenin
QQISQPQLPQQQQLPQQPQQF	gamma-gliadin/LMW glutenin
QQLSQPQIPQQQQIPQQPQQF	gamma-gliadin/LMW glutenin
QQLSQPQIPQQQQLPQQPQQF	gamma-gliadin/LMW glutenin
QQLSQPQLPQQQQIPQQPQQF	gamma-gliadin/LMW glutenin
QQLSQPQLPQQQQLPQQPQQF	gamma-gliadin/LMW glutenin
QSEQSQQPFQPQ	gamma-gliadin/LMW glutenin
KPFPQPEQPFPWQP	omega-gliadin
QKFPQPEQPFPWQP	omega-gliadin
QPFPQPEQPFKWQP	omega-gliadin
QPFPQPEQPFPKQP	omega-gliadin
QPFPQPEQPFPWKP	omega-gliadin
QPFPQPEQPFPWQK	omega-gliadin
QPKPQPEQPFPWQP	omega-gliadin
QLPQQPQQF	omega-gliadin/LMW glutenin
QQQLPQQPQQF	omega-gliadin/LMW glutenin
QQQQLPQQPQQF	omega-gliadin/LMW glutenin
QGLERPWQQQPLPPQ	LMW glutenin
GQQGYYPTSPQQPPQ	HMW glutenin
GQQGYYPTSPQQSPQ	HMW glutenin
PQQPQPFPQQPVPQQP	Hordein
QPQQPIPQQPQPYPQQ	Hordein
QPQQPQPFPQQPVPQQPQPY	Hordein
GMQVGPSGEVEWPQQG	gamma-secalin
QVGPSGEVEWPQ	gamma-secalin
QYQPYPEQQQPFVQ	gamma-avenin
QYQPYPQQQQPILQQ	gamma-avenin

## Sheet: Supp Table 5
Supplementary Table 5. Gluten peptides identified in the four non-PEP containing commerical wheat beers with their associated gluten protein class, as shown in Supplementary Figure 7.
Comm 1				Comm 2				Comm 3				Comm 4
Chymotryptic (558)	Gluten Protein Class	Hydrolyzed (172)	Gluten Protein Class	Chymotryptic (859)	Gluten Protein Class	Hydrolyzed (412)	Gluten Protein Class	Chymotryptic (1204)	Gluten Protein Class	Hydrolyzed (582)	Gluten Protein Class	Chymotryptic (130)	Gluten Protein Class	Hydrolyzed (169)	Gluten Protein Class
AIIMHQQEQQQQL	alpha-gliadin	AIILHQQQKQQQQPSSQVSFQEPLQ	alpha-gliadin	AIILHQQQQ	alpha-gliadin	AIILHQQHHHHQQQQQQQQQQPL	alpha-gliadin	AIHNVAHAIIM	alpha-gliadin	AIILHQQHHHHQQQQQQQQQQPL	alpha-gliadin	FQPSQQNPQAQGF	alpha-gliadin	DVVLQQPNIAHAS	alpha-gliadin
ALETLPAMCN	alpha-gliadin	AQGSVQPQQLPQFAEIR	alpha-gliadin	AIILHQQQQQQ	alpha-gliadin	AIILHQQQQQQGQHQQ	alpha-gliadin	AIHNVIHAIIL	alpha-gliadin	AIILHQQHHHHQQQQQQQQQQPLSQ	alpha-gliadin	LQPQNPSQQQPQEQVPL	alpha-gliadin	FPPQQPYPQPQPFSPQQPFLQPQPFPP	alpha-gliadin
ALETLPAMCNVY	alpha-gliadin	AQGSVQPQQLPQFEEIR	alpha-gliadin	AIILHQQQQQQGQ	alpha-gliadin	AIILHQQQQQQQQQQQKQPLS	alpha-gliadin	AIILHQQQQ	alpha-gliadin	AIILHQQQK	alpha-gliadin	NLALQTLPAMCN	alpha-gliadin	FPVPQLQPQNPSQQQPQ	alpha-gliadin
ALQTLPSMCNVY	alpha-gliadin	DVVLQQHNIAHASSQVLQ	alpha-gliadin	AIILHQQQQQQGQHQQ	alpha-gliadin	AIILHQQQQQQQQQQQQGQHQPS	alpha-gliadin	AIILHQQQQQQ	alpha-gliadin	AIILHQQQKQQQQL	alpha-gliadin	PQPQPFSPQQP	alpha-gliadin	FQPSQLNPQAQGSVQPQ	alpha-gliadin
AQGSVQPQQLPQFAEIRNL	alpha-gliadin	FQPSQLNPQAQGSVQPQQLPQFAEIR	alpha-gliadin	AIILHQQQQQQQQ	alpha-gliadin	AIILHQQQQQQQQQQQQKQPLS	alpha-gliadin	AIILHQQQQQQQQ	alpha-gliadin	AIILHQQQQQQQQQQQKQP	alpha-gliadin	QQPNIAHASSQVSQQSY	alpha-gliadin	LQPQNPSQQQP	alpha-gliadin
AQGSVQPQQLPQFEEIRNL	alpha-gliadin	GFVQPQQLPQFEEIR	alpha-gliadin	AIIMHQQQQQQQEQQQQL	alpha-gliadin	AIILHQQQQQQQQQQRQPSS	alpha-gliadin	AIIMHQQQQQQQEQQQQL	alpha-gliadin	AIILHQQQQQQQQQQQKQPLS	alpha-gliadin	QQPQQQYPSGQGF	alpha-gliadin	LQPQNPSQQQPQEQVPL	alpha-gliadin
CCQHLW	alpha-gliadin	GSVQPQQIPQFEEIR	alpha-gliadin	AINNVVHAIIL	alpha-gliadin	AIIMHQQQQQQQEQQQQLQ	alpha-gliadin	AINNVVHAIIL	alpha-gliadin	AIILHQQQQQQQQQQQKQPLSQ	alpha-gliadin	QQQLIPCRDVVL	alpha-gliadin	LQPQNPSQQQPQEQVPLVQQ	alpha-gliadin
FQPSQQNPQAQGF	alpha-gliadin	KQQQELSSQVSFQQPQQQYPLGQGSFRPSQQNPQAQGSVQPQQLPQFAEIR	alpha-gliadin	ALETLPAMCN	alpha-gliadin	AIIMHQQQQQQQEQQQQLQQQ	alpha-gliadin	ALETLPAMCN	alpha-gliadin	AIILHQQQQQQQQQQQQP	alpha-gliadin	QQQLIPCRDVVLQ	alpha-gliadin	LQPQNPSQQQPQEQVPLVQQQ	alpha-gliadin
FQPSQQNPQAQGSF	alpha-gliadin	NLALQTLPAMCNAYIPPYCSTT	alpha-gliadin	ALETLPAMCNVY	alpha-gliadin	AIIMHQQQQQQQEQQQQLQQQQ	alpha-gliadin	ALETLPAMCNVY	alpha-gliadin	AIILHQQQQQQQQQQQQPL	alpha-gliadin	QTIPTMCNVY	alpha-gliadin	MPQLQPQNPSQQQPQ	alpha-gliadin
FQQPQQQYPSSQVSF	alpha-gliadin	NLALQTLPAMCNAYIPPYCSTTIAPFG	alpha-gliadin	ALQTLPAICNVY	alpha-gliadin	AIIMHQQQQQQQEQQQQLQQQQQQQLH	alpha-gliadin	ALQTLPAICNVY	alpha-gliadin	AIILHQQQQQQQQQQQQQPL	alpha-gliadin	TLPAMCNVY	alpha-gliadin	MVRVPVPQLQPQNPSQQQPQ	alpha-gliadin
GFFQPSQQNPQAQGF	alpha-gliadin	NLALQTLPAMCNVYIPPYCTMAP	alpha-gliadin	AQGSVQPQQLPQF	alpha-gliadin	AIIMHQQQQQQQEQQQQLQQQQQQQLHQQ	alpha-gliadin	ALQTLPSMCNVY	alpha-gliadin	AQGSVQPQQLPQ	alpha-gliadin	VPQLQPQNPSQQQPQ	alpha-gliadin	NIAHASSQVLQQS	alpha-gliadin
GSSQVLQQSTY	alpha-gliadin	NLALQTLPAMCSVYIPPYCSTTIAP	alpha-gliadin	AQGSVQPQQLPQFEEIRNL	alpha-gliadin	AQGSVQPQQLPQFAEIR	alpha-gliadin	AQGSFQPQQLPQFEAIRNL	alpha-gliadin	AVRVPVPQLQPQNPSQQQPQDQVPLVQQQ	alpha-gliadin	VPQLQPQNPSQQQPQEQVPL	alpha-gliadin	PQLPYPQPHLPYSQPQPFQPQQP	alpha-gliadin
GSVQPQQIPQFEEIRNL	alpha-gliadin	PLAQGSVQPQQLPQFEEIR	alpha-gliadin	AQGSVQPQQLPQFQEIRNL	alpha-gliadin	AQGSVQPQQLPQFEEIR	alpha-gliadin	AQGSVQPQQLPQ	alpha-gliadin	DVVLQQHNIAHA	alpha-gliadin	VPVPQLQPQNPSQQQP	alpha-gliadin	QPYPQPQYSQPQQPIS	alpha-gliadin
GSVQPQQLPQFAEIRNL	alpha-gliadin	PQAQGSFQPQQLPQFEAIR	alpha-gliadin	CNVYVPPY	alpha-gliadin	ARQTLPAMCNVYIPPYCSTTIAPSGIFGTN	alpha-gliadin	AQGSVQPQQLPQF	alpha-gliadin	DVVLQQHNLAHGRSQV	alpha-gliadin	VPVPQLQPQNPSQQQPQ	alpha-gliadin	QPYPQPQYSQPQQPISQQQQ	alpha-gliadin
HLQPQQPISQQ	alpha-gliadin	PQAQGSVQPQQLPQFAEIR	alpha-gliadin	CTIAPVGIF	alpha-gliadin	DVVLQQH	alpha-gliadin	AQGSVQPQQLPQFEEIRNL	alpha-gliadin	DVVLQQHSIAHGSSQVLQQ	alpha-gliadin	YLQPQQPISQQ	alpha-gliadin	QQPYPQPQPFPSQQPYPQPQPFRPQQPQ	alpha-gliadin
HLQPQQPISQQQ	alpha-gliadin	PQAQGSVQPQQLPQFEEIR	alpha-gliadin	CTIAPVGIFG	alpha-gliadin	DVVLQQHNIA	alpha-gliadin	AQGSVQPQQLPQFQEIRNL	alpha-gliadin	DVVLQQPNIAHAS	alpha-gliadin	YLQPQQPISQQQAQ	alpha-gliadin	QYPGQQPPFPPQQPYPQPQPFPS	alpha-gliadin
IAHGSSQVLQESTY	alpha-gliadin	QPQQQYPSGQGSFQPSQQNPQGQGSVQPQQLPQFEEIR	alpha-gliadin	DVVLQQHSIAY	alpha-gliadin	DVVLQQHNIAH	alpha-gliadin	CCQHLW	alpha-gliadin	DVVLQQPNIAHASSKVSQQSYQ	alpha-gliadin	AQISEQARCQ	avenin	SQQQPQEQVPLVQE	alpha-gliadin
LQLQPFPQPQLPY	alpha-gliadin	VPQLQPQNPSQQQPQ	alpha-gliadin	DVVLQQPNIAHAS	alpha-gliadin	DVVLQQHNIAHA	alpha-gliadin	CTIAPVGIF	alpha-gliadin	FFQPSQQNPQAQ	alpha-gliadin	AQISEQARCQAVC	avenin	VPQLQPQNPSQQEPQEQVP	alpha-gliadin
LQLQPFPQPQLSY	alpha-gliadin	VPVPQLQPQNPSQ	alpha-gliadin	DVVLQQPNIAHASSQVSQQSY	alpha-gliadin	DVVLQQHNIAHGR	alpha-gliadin	ETLPAMCN	alpha-gliadin	FFQPSQQNPQAQG	alpha-gliadin	AVCGVAQVIM	avenin	VPQLQPQNPSQQQ	alpha-gliadin
LQLQPFPQPQPF	alpha-gliadin	VPVPQLQPQNPSQQ	alpha-gliadin	ETLPAMCN	alpha-gliadin	DVVLQQHSIAHGSSQVLQQSTYQ	alpha-gliadin	ETLPAMCNVY	alpha-gliadin	FFQPSQQNPQAQGFVQPQQLPQ	alpha-gliadin	CNIYVPVQCQQQ	avenin	VPQLQPQNPSQQQP	alpha-gliadin
LQNPSQQQPQEQVPL	alpha-gliadin	VPVPQLQPQNPSQQEPQEQVPLVQ	alpha-gliadin	ETLPAMCNVY	alpha-gliadin	DVVLQQHSIAHGSSQVLQQSTYQL	alpha-gliadin	FFQPSQQNPQAQ	alpha-gliadin	FFQPSQQNPQAQGSFQPQ	alpha-gliadin	CTTTPCSTIT	avenin	VPQLQPQNPSQQQPQ	alpha-gliadin
LQPFPQPQLSY	alpha-gliadin	VPVPQLQPQNPSQQEPQEQVPLVQQ	alpha-gliadin	FFQPSQQNPQAQGF	alpha-gliadin	DVVLQQHSIAYGSSQVLQQSTYQ	alpha-gliadin	FFQPSQQNPQAQGF	alpha-gliadin	FFQPSQQNPQAQGSFQPQQLPQ	alpha-gliadin	CTTTPCSTITP	avenin	VPQLQPQNPSQQQPQE	alpha-gliadin
LQPQIPY	alpha-gliadin	VPVPQLQPQNPSQQQ	alpha-gliadin	FQPSQQNPQAQ	alpha-gliadin	DVVLQQPNIAH	alpha-gliadin	FIGQQQPFPPQQPY	alpha-gliadin	FLGQQQPFPPQQPYPEPQPFPSQQPY	alpha-gliadin	CTTTPCSTITPA	avenin	VPQLQPQNPSQQQPQEQ	alpha-gliadin
LQPQNPSQQQPQEQVPL	alpha-gliadin	VPVPQLQPQNPSQQQP	alpha-gliadin	FQPSQQNPQAQGF	alpha-gliadin	DVVLQQPNIAHAS	alpha-gliadin	FQIPEQSRCQ	alpha-gliadin	FLGQQQPFPPQQPYPQPQPFPSQQPY	alpha-gliadin	CTTTPCSTITPAIY	avenin	VPQLQPQNPSQQQPQEQVPL	alpha-gliadin
LQPQQPISQQ	alpha-gliadin	VPVPQLQPQNPSQQQPQ	alpha-gliadin	FQPSQQNPQAQGSF	alpha-gliadin	DVVLQQPNIAHASSQVSQQ	alpha-gliadin	FQPSQQNPQAQG	alpha-gliadin	FPQPQPFPPQLPYPQP	alpha-gliadin	CTTTPCSTITPT	avenin	VPQLQPQNPSQQQPQEQVPLVQ	alpha-gliadin
LQPQQPISQQQ	alpha-gliadin	VPVPQLQPQNPSQQQPQE	alpha-gliadin	FQPSQQNPQAQGSFQPQ	alpha-gliadin	DVVLQQPNIAHASSQVSQQSYQ	alpha-gliadin	FQPSQQNPQAQGF	alpha-gliadin	FPQPQPFPPQLPYPQPQ	alpha-gliadin	CTTTPCSTITQTP	avenin	VPQLQPQNPSQQQPQEQVPLVQQ	alpha-gliadin
LQPQQPISQQQAQ	alpha-gliadin	VPVPQLQPQNPSQQQPQEQ	alpha-gliadin	FQPSQQNPQAQGSFQPQQLPQ	alpha-gliadin	DVVLQQPNIAHASSQVSQQSYQL	alpha-gliadin	FQPSQQNPQAQGSF	alpha-gliadin	FPVPQLQPQNPSQQQPQEQVPLVQQ	alpha-gliadin	CTTTPCSTITQTPY	avenin	VPQLQPQNPSQQQPQEQVPLVQQQQ	alpha-gliadin
LQPQQPISQQQAQQQ	alpha-gliadin	VPVPQLQPQNPSQQQPQEQVPLVQ	alpha-gliadin	FQQPQQQYPSSQVSF	alpha-gliadin	FFQPSQQNPQAQ	alpha-gliadin	FQPSQQNPQAQGSFQPQ	alpha-gliadin	FQPSQLNPQAQGSVQPQ	alpha-gliadin	GQCQQQPQPQPQMNTCAAF	avenin	VPQLQPQNPSQQQPQKQVP	alpha-gliadin
NIAHASSQVLQ	alpha-gliadin	VPVPQLQPQNPSQQQPQEQVPLVQQ	alpha-gliadin	FVQPQQLPQFEEIRNL	alpha-gliadin	FLGQQQPFPPQQPYPEPQPFPSQQPY	alpha-gliadin	FQPSQQNPQAQGSFQPQQLPQ	alpha-gliadin	FQPSQLNPQAQGSVQPQQLPQF	alpha-gliadin	GQPQQQQGQSF	avenin	VPVPQLQPQNPSQQ	alpha-gliadin
NIAHASSQVLQQSTY	alpha-gliadin	VRVPVPQLEPQNPSQQQPQ	alpha-gliadin	GFVQPQHLPQLEEISNL	alpha-gliadin	FQPSQLNPQAQGSVQPQ	alpha-gliadin	FQPSQQNPQAQGSFQPQQLPQFEA	alpha-gliadin	FVQPQHLPQLEE	alpha-gliadin	GQPQQQVPIEIR	avenin	VPVPQLQPQNPSQQEPQEQVPLVQ	alpha-gliadin
NIAHGSSQVLQESTY	alpha-gliadin	VRVPVPQLEPQNPSQQQPQEQVPLVQ	alpha-gliadin	GSSQVLQQSTY	alpha-gliadin	FQPSQLNPQAQGSVQPQQLPQFAEIR	alpha-gliadin	FQPSQQNPQAQGSFQPQQLPQFEAIRNL	alpha-gliadin	FVQPQQLPQFE	alpha-gliadin	IVVEAIIQQQSQQQ	avenin	VPVPQLQPQNPSQQEPQEQVPLVQQ	alpha-gliadin
NLALQTLPAMCN	alpha-gliadin	VRVPVPQLQPQNPSQQEPQEQVPLVQQ	alpha-gliadin	GSVQPQQIPQF	alpha-gliadin	FQQPQQQYPS	alpha-gliadin	FQQPQQQYPL	alpha-gliadin	GFVQPQQLPQFQE	alpha-gliadin	LQQCSPTPY	avenin	VPVPQLQPQNPSQQHP	alpha-gliadin
PQNPSQQQPQEQVPLIQ	alpha-gliadin	VRVPVPQLQPQNPSQQQPQ	alpha-gliadin	GSVQPQQIPQFEEIRNL	alpha-gliadin	FVQPQHLPQ	alpha-gliadin	FVQPQHLPQLEEISNL	alpha-gliadin	GRSQVLQQSTY	alpha-gliadin	LQQCSQTPHVQT	avenin	VPVPQLQPQNPSQQQP	alpha-gliadin
PQPQLPYPQPQPF	alpha-gliadin	VRVPVPQLQPQNPSQQQPQEQVPLV	alpha-gliadin	GSVQPQQLPQFAEIRNL	alpha-gliadin	FVQPQHLPQLEEISN	alpha-gliadin	FVQPQQLPQFEEIRNL	alpha-gliadin	GRVPVPQLQPQNPSQQQP	alpha-gliadin	LQTQVEQL	avenin	VPVPQLQPQNPSQQQPQ	alpha-gliadin
QHNIAHASSQVL	alpha-gliadin	AIQSVEEAIIQQQPQQ	avenin	GVPVPQLQPQNPSQQQPQEQVPL	alpha-gliadin	FVQPQQLPQFEEIRN	alpha-gliadin	FVQPQQLPQFQEIRNL	alpha-gliadin	GRVPVPQLQPQNPSQQQPQEQVPL	alpha-gliadin	LQTQVEQLSSCQIVQY	avenin	VPVPQLQPQNPSQQQPQE	alpha-gliadin
QIPEQSQCQAIH	alpha-gliadin	AIVMQQQQQQVQ	gamma-gliadin	HAIILQQQLQ	alpha-gliadin	GQQQPFPPQQPYPQPQPFPSQQPYPQPQ	alpha-gliadin	GFVQPQQLPQFEEIRNL	alpha-gliadin	GRVPVPQLQPQNPSQQQPQEQVPLVQQQ	alpha-gliadin	NVAEAIRQQQPQ	avenin	VPVPQLQPQNPSQQQPQEQ	alpha-gliadin
QLIPCRDVVLQQH	alpha-gliadin	AIVMQQQQQQVQQ	gamma-gliadin	HLQPQQPISQQ	alpha-gliadin	GSVQPQQIPQFEEIR	alpha-gliadin	GSFQPQQLPQFEAIRNL	alpha-gliadin	HQQQQQQQEQQQQLQQQQQQQLH	alpha-gliadin	NVPMATTCVGGTC	avenin	VPVPQLQPQNPSQQQPQEQVP	alpha-gliadin
QPQPFLPQLPYPQPQPF	alpha-gliadin	AIVMQQQQQQVQQQ	gamma-gliadin	HLQPQQPISQQQ	alpha-gliadin	GSVQPQQLPQFAEIR	alpha-gliadin	GSSQVLQESTY	alpha-gliadin	HQQQQQQQEQQQQLQQQQQQQLHQQ	alpha-gliadin	QAVCSVAQIIM	avenin	VPVPQLQPQNPSQQQPQEQVPLVQQ	alpha-gliadin
QPSQLNPQAQGSVQPQ	alpha-gliadin	AIVMQQQQQQVQQQVDH	gamma-gliadin	HLQPQQPISQQQA	alpha-gliadin	GSVQPQQLPQFEE	alpha-gliadin	GSSQVLQQSTY	alpha-gliadin	HQQQQQQQQQQQPSSQVSFQQPQQQYPLGQGSFRPSQQNPQAQGSVQPQ	alpha-gliadin	QAVCSVAQVIM	avenin	VPVPQLQPQNPSQQQPQEQVPLVQQQ	alpha-gliadin
QPSQLNPQAQGSVQPQQLPQFAEIRNL	alpha-gliadin	AIVMQQQQQQVQQQVDHGF	gamma-gliadin	HLQPQQPISQQQAQ	alpha-gliadin	HAIILHQQQQQQQQQQQQQQQQQQEQQQQQPS	alpha-gliadin	GSVQPQQIPQFEEIRNL	alpha-gliadin	HSIAYGSSQVLQQ	alpha-gliadin	QLDTTCSQGY	avenin	RSAWEPQHPSSPEHQP	avenin
QPSQQNPQAQGF	alpha-gliadin	AIVMQQQQQQVQQQVDHGFVQ	gamma-gliadin	HLQPQQPISQQQAQQ	alpha-gliadin	HAIIMHQQQQQQQEQQQQL	alpha-gliadin	GSVQPQQLPQFAEIRNL	alpha-gliadin	IAHASSQVLQQSSYQQ	alpha-gliadin	QTLPSMCSVNIPQY	avenin	SAWEPQHPSSPEHQP	avenin
QQHNIAHASSQVL	alpha-gliadin	EQPQQPFPWQQPTIQL	gamma-gliadin	HLQPQQPISQQQAQQQ	alpha-gliadin	HAIIMHQQQQQQQEQQQQLQQQQ	alpha-gliadin	GSVQPQQLPQFQEIRNL	alpha-gliadin	IAHGRSQVLQQSTYQ	alpha-gliadin	SVNIPQYCTTTPCSTIT	avenin	FPQPQEQFPQPQQPQ	gamma-gliadin
QQLIPCRDVVL	alpha-gliadin	FNPSGLELERPQQLFPQWQPLPQQPP	gamma-gliadin	HLQPQQPISQQQAQQQQ	alpha-gliadin	HQQQQQQQEQQQQLQQQQQQQLHQQ	alpha-gliadin	GSVQPQQLPQYEEIRNL	alpha-gliadin	LGQQQPFPPQQPYPEPQPFPSQQPY	alpha-gliadin	TQVEQLSSCQIVQY	avenin	FPQPQQPFPQQPQQPFP	gamma-gliadin
QQPISLQQAQQQQQ	alpha-gliadin	FPQPQQPQQPFPQPQQAH	gamma-gliadin	HLQPQQPISQQQAQQQQQ	alpha-gliadin	HQQQQQQQEQQQQLQQQQQQQLQ	alpha-gliadin	GVPVPQLQPQNPSQQQPQEQVPL	alpha-gliadin	LNPQAQGSVQPQQLPQF	alpha-gliadin	VIVRQQQGQSF	avenin	GQGIIQPQQPAQLE	gamma-gliadin
QQPNIAHASSQVSQQSY	alpha-gliadin	FPQPQQPQQPFPQPQQAHL	gamma-gliadin	HLQPQQPISQQQAQQQQQQ	alpha-gliadin	LQNPSQQQPQEQVPLVQE	alpha-gliadin	HLQPQQPISQQQ	alpha-gliadin	LPYPQPQLPYPQPQP	alpha-gliadin	VPVQCQQQQQL	avenin	PQQPFPQPQQPQQQLPQSQQPQQP	gamma-gliadin
QQPQEQYPSGQGSF	alpha-gliadin	FPQPQQPQQPFPQPQQAHLPFPQ	gamma-gliadin	HLQPQQPISQQQAQQQQQQQ	alpha-gliadin	LQNPSQQQPQEQVPLVQEQ	alpha-gliadin	HLQPQQPISQQQAQ	alpha-gliadin	LQNPSQQQPQEQVPLVQE	alpha-gliadin	ANINEQSRCPAI	gamma-gliadin	PQQPFPQQPQQPFLQTQQPQQPFPQLQQPQ	gamma-gliadin
QQPQQQYPL	alpha-gliadin	GQGIIQPQQPAQLE	gamma-gliadin	HLQPQQPISQQQAQQQQQQQQQ	alpha-gliadin	LQPFPQPQLPYPQPQLPYPQPQP	alpha-gliadin	HNIAHGSSQVLQESTY	alpha-gliadin	LQPFPQPQLPYPQPQLPYP	alpha-gliadin	ANINEQSRCPAIQ	gamma-gliadin	PQQPFPQQPQQPYPQEPQQP	gamma-gliadin
QQPQQQYPLGQGSF	alpha-gliadin	GQGIIQPQQPAQLEAIR	gamma-gliadin	HLQPQQPISQQQAQQQQQQQQQQQILQ	alpha-gliadin	LQPQNPSQQQPQEQVP	alpha-gliadin	HQQQQQQQEQQQQL	alpha-gliadin	LQPFPQPQLPYPQPQLPYPQPQ	alpha-gliadin	ANINEQSRCPAIQT	gamma-gliadin	PQQPFPQTQQPQQP	gamma-gliadin
QQPQQQYPSGQGF	alpha-gliadin	GQGIIQPQQPAQLEVIR	gamma-gliadin	HLQPQQPISQQQAQQQQQQQQQQQQ	alpha-gliadin	LQPQNPSQQQPQEQVPL	alpha-gliadin	HQQQQQQQQEQHQPSSQVSY	alpha-gliadin	LQPFPQPQPFLPQLPYPQPQ	alpha-gliadin	AQIPQQLQC	gamma-gliadin	PQQQQQPFPQPQQPQQPQ	gamma-gliadin
QQPQQQYPSGQGFF	alpha-gliadin	GQGIIQPQQPAQYEVIR	gamma-gliadin	HLQPQQPISQQQVQ	alpha-gliadin	NIAHASSQVLQ	alpha-gliadin	HQQQQQQQQQQQQPL	alpha-gliadin	LQPQNPSQQQP	alpha-gliadin	AQMEAIRTL	gamma-gliadin	PSGQVQWPQQQ	gamma-gliadin
QQPQQQYPSGQGSF	alpha-gliadin	GQGVAQPQQLAQMEAIR	gamma-gliadin	HLQPQQPISQQQVQQ	alpha-gliadin	NIAHASSQVLQQ	alpha-gliadin	HQQQQQQQQQQQQQPL	alpha-gliadin	LQPQNPSQQQPQE	alpha-gliadin	AQQQPSIEEQHQL	gamma-gliadin	PSGQVQWPQQQLVPQPQQP	gamma-gliadin
QQPQQQYPSSQVSF	alpha-gliadin	GQVQWPQQQQPFPQPQQPQQPFPQPQQP	gamma-gliadin	HLQPQQPISQQQVQQQQ	alpha-gliadin	NIAHASSQVLQQSSYQ	alpha-gliadin	HQQQQQQQQQQQQQQQQPSSQVSY	alpha-gliadin	LQPQNPSQQQPQEQ	alpha-gliadin	CLQLAQIPEQY	gamma-gliadin	PSGQVQWPQQQLVPQPQQPL	gamma-gliadin
QQQLIPCMDVVLQQH	alpha-gliadin	IIQPQQPAQYEVIR	gamma-gliadin	HQQQQQQQEQQQQL	alpha-gliadin	NIAHASSQVLQQSSYQL	alpha-gliadin	HQQRQQPSSQVSF	alpha-gliadin	LQPQNPSQQQPQEQVP	alpha-gliadin	CNVYVPPECSIIK	gamma-gliadin	PSGQVQWPQQQPFRQPQ	gamma-gliadin
QQQLIPCRDVVL	alpha-gliadin	ITTTTMQFNPSGLELERPQ	gamma-gliadin	IAHASSQVSQQSY	alpha-gliadin	NIAHASSQVLQQSTY	alpha-gliadin	IAHASSQVSQQSY	alpha-gliadin	LQPQNPSQQQPQEQVPL	alpha-gliadin	GIIQPQQPAQL	gamma-gliadin	PSGQVQWPQQQPFRQPQQ	gamma-gliadin
QQQLIPCRDVVLQ	alpha-gliadin	LERPQQLFPQWQPLPQQPP	gamma-gliadin	IAHGSSQVLQESTY	alpha-gliadin	NIAHASSQVLQQSTYQ	alpha-gliadin	IAHGSSQVLQESTY	alpha-gliadin	NIAHASSQVLQQ	alpha-gliadin	GQGIIQPQQPAQL	gamma-gliadin	PSSQVQWPQQQPFRQPQQ	gamma-gliadin
QQQLIPCRDVVLQQ	alpha-gliadin	LERPQQLFPQWQPLPQQPPFL	gamma-gliadin	ILQQQLIPCRDVV	alpha-gliadin	NIAHESSQVLQQS	alpha-gliadin	IGQQQPFPPQQPY	alpha-gliadin	NIAHASSQVLQQS	alpha-gliadin	IILPRSDCQVM	gamma-gliadin	PSSQVQWPQQQPVPQPH	gamma-gliadin
QQQLIPCRDVVLQQH	alpha-gliadin	LERPQQLFPQWQPLPQQPPFLQ	gamma-gliadin	ILQQQLIPCRDVVLQ	alpha-gliadin	NIAHESSQVLQQSSYQV	alpha-gliadin	ILQQQLIPCMDV	alpha-gliadin	NIAHASSQVLQQSSYQ	alpha-gliadin	IIWPQSDCQVM	gamma-gliadin	QPQQPFPQFQQPQQP	gamma-gliadin
QQQLTPCMDVVLQQH	alpha-gliadin	LFPQWQPLPQQPPFL	gamma-gliadin	IPCRDVVLQQH	alpha-gliadin	NIAHGRSQVLQQSTY	alpha-gliadin	ILQQQLIPCRDVV	alpha-gliadin	NIAHASSQVLQQSSYQQ	alpha-gliadin	KCTAIDSIVH	gamma-gliadin	QPQQPFPQQPQLPFPQQPQ	gamma-gliadin
QQQQQEQQQQQQQIL	alpha-gliadin	LFPQWQPLPQQPPFLQ	gamma-gliadin	IPPHCSTTIAPF	alpha-gliadin	NIAHGSSQVLQE	alpha-gliadin	ILQQQLIPCRDVVLQ	alpha-gliadin	NIAHASSQVLQQST	alpha-gliadin	KCTAIDSIVHA	gamma-gliadin	QPQQPFPQSQQPQQPFPQPEQQFPQPQ	gamma-gliadin
QQQQQQPSSQVSY	alpha-gliadin	LPQQQAQFK	gamma-gliadin	IPPYCSTTI	alpha-gliadin	NIAHGSSQVLQESTYQ	alpha-gliadin	ILQQQLIPCRDVVLQQH	alpha-gliadin	NIAHASSQVLQQSTYQ	alpha-gliadin	KTLPTMCN	gamma-gliadin	QPQQPFPQTQQPQQPFPQFQQPQQP	gamma-gliadin
QQQQQQQEQQIL	alpha-gliadin	LQQQPGQAFVLPQQQAQFK	gamma-gliadin	IPPYCTIAPVGIF	alpha-gliadin	NIAQGRSQVLQQSTYQ	alpha-gliadin	IMHQQQQQQQEQQQQL	alpha-gliadin	NIAHGRSQVLQQSTY	alpha-gliadin	KTLPTMCNVY	gamma-gliadin	SIIMQQQQQQQQQQGMH	gamma-gliadin
QQQQQQQQIL	alpha-gliadin	LVQGQGIIQPQQPAQLEVLR	gamma-gliadin	LPQLPYPQPQPFPPQQSY	alpha-gliadin	NLAHGRSQVLQQSTYQ	alpha-gliadin	IPCRDVVLQ	alpha-gliadin	NIAHGSSQVLQE	alpha-gliadin	LCNVHVPPY	gamma-gliadin	VQGQGIIQPQQPAQ	gamma-gliadin
QQQQQQQQPSSQVSY	alpha-gliadin	LVQGQGIIQPQQPAQYEVIR	gamma-gliadin	LPQLPYPRPQPF	alpha-gliadin	NLAHGRSQVLQQSTYQL	alpha-gliadin	IPCRDVVLQQ	alpha-gliadin	NIAHGSSQVLQES	alpha-gliadin	LLQQCKPVS	gamma-gliadin	VQGQGIIQPQQPAQLE	gamma-gliadin
QQQQQQQQQEQQILQQIL	alpha-gliadin	NIQVDPSGQVQWLQQ	gamma-gliadin	LPYPQPQLPYPQPQPF	alpha-gliadin	NLALQTLPAMCNAYIPPYCSTT	alpha-gliadin	IPCRDVVLQQH	alpha-gliadin	NIAHGSSQVLQESTYQ	alpha-gliadin	LLQQCRPVS	gamma-gliadin	ASQQQPGQGQQGHYPASQQQPGQGQQGHY	HMW-glutenin
QQQQQQQQQLI	alpha-gliadin	NMQVDPSGQVQWPQQQPFRQPQQP	gamma-gliadin	LQLQNPSQQQPQEQVPL	alpha-gliadin	NLALQTLPAMCNAYIPPYCSTTIAPF	alpha-gliadin	IPPHCSTTIAPF	alpha-gliadin	NLAHGRSQVLQQSTYQ	alpha-gliadin	LLQQCRPVSL	gamma-gliadin	AYTQQKPGQGYNPGGTSPLH	HMW-glutenin
QQQQQQQQQQLL	alpha-gliadin	PQQPFPQPQQPQLPFPLQPQQPFPQPQQP	gamma-gliadin	LQLQPFPQPQL	alpha-gliadin	NLALQTLPAMCNAYIPPYCSTTIAPFG	alpha-gliadin	IPPYCSTTI	alpha-gliadin	NVAHAIIMHQQQQQQQEQQQQ	alpha-gliadin	LLQQCTLDEKVP	gamma-gliadin	GQGQQGHYPASQQQPGQGQQGHY	HMW-glutenin
QQQQQQQQQQQII	alpha-gliadin	PQQPFPQPQQPQQQLPQSQQPQQP	gamma-gliadin	LQLQPFPQPQLPY	alpha-gliadin	NLALQTLPAMCNVYIPPYCTMAP	alpha-gliadin	IPPYCTIAPVGIF	alpha-gliadin	PLAQGSVQPQQLPQ	alpha-gliadin	LQQQLNPCKNF	gamma-gliadin	GQGQQGHYPASQQQPGQGQQGHYP	HMW-glutenin
QQQQQQQQQQQQPSSQVSF	alpha-gliadin	PQQPQLPFPLQPQQPFPQPQQP	gamma-gliadin	LQLQPFPQPQLPYPQPHLPY	alpha-gliadin	NVAHAIIMHQQQQQQQEQQQ	alpha-gliadin	KQQQQQQQQIL	alpha-gliadin	PLAQGSVQPQQLPQF	alpha-gliadin	LQQQMNPCKNF	gamma-gliadin	GQGQQGHYPASQQQPGQGQQGHYPA	HMW-glutenin
QQQQQQQQQQQQQII	alpha-gliadin	PQQQQFPQQPQQTFPQPQQIFPHQPQQQFPQPQQ	gamma-gliadin	LQLQPFPQPQLPYPQPQPF	alpha-gliadin	NVAHAIIMHQQQQQQQEQQQQL	alpha-gliadin	LALQTLPAMCN	alpha-gliadin	PPQQQYPQQQPQYPQPQQP	alpha-gliadin	LSLQQQMNPC	gamma-gliadin	GQGQQGYASPYHVS	HMW-glutenin
QQQQQQQQQQQQQQLL	alpha-gliadin	PSGQVQWPQQQLVPQPQQP	gamma-gliadin	LQLQPFPQPQLSY	alpha-gliadin	PFPQPQPFPPQQPYPQPQP	alpha-gliadin	LCCQHLW	alpha-gliadin	PQAQGFVQPQQLPQ	alpha-gliadin	QLAQIPEQY	gamma-gliadin	GQGQQLGQGQQPGHGQQLVQGQQQGQGQQGHY	HMW-glutenin
QQQQQQQQQQQQQQQIL	alpha-gliadin	PSGQVQWPQQQLVPQPQQPLS	gamma-gliadin	LQLQPFPQPQPF	alpha-gliadin	PQAQGFVQPQQLPQFEE	alpha-gliadin	LGQQQQQFPGQQQPFPPQQPYPQPQPF	alpha-gliadin	PQAQGSVQPQQLPQ	alpha-gliadin	QLAQIPQQL	gamma-gliadin	GQGQQPGQWQQSGQGQHGY	HMW-glutenin
QQQQQQQQQQQQQQQQIL	alpha-gliadin	PSGQVQWPQQQPFLQPHQP	gamma-gliadin	LQLQPFPQPQPFPPQLPYPQPQ	alpha-gliadin	PQAQGSVQPQQLPQFE	alpha-gliadin	LLQQQLIPCMDVVLQQH	alpha-gliadin	PQLFPQPQQFPPQLPYPQPQ	alpha-gliadin	QQLAQIPQQL	gamma-gliadin	GQGYNPGGTSPLHQQ	HMW-glutenin
QQQRQQPSSQVSF	alpha-gliadin	PSGQVQWPQQQPFPQPQQP	gamma-gliadin	LQNPSQQQPQEQVPL	alpha-gliadin	PQAQGSVQPQQLPQFEEIR	alpha-gliadin	LPQLPYPQPQPFPPQQSY	alpha-gliadin	PQPFPPQLPYPQPQPYPP	alpha-gliadin	QQLNPCKNF	gamma-gliadin	GQQPGQGQSGYFPTSRQRSGQGQQPGQGQQ	HMW-glutenin
QQYPLGQGSF	alpha-gliadin	PSGQVQWPQQQPFRQPQQP	gamma-gliadin	LQPQNPSLQQPQ	alpha-gliadin	PQPFPQPQPFPPQQPYPQP	alpha-gliadin	LPQLPYPRPQPF	alpha-gliadin	PQPFPQLQPFPPQLPYPQP	alpha-gliadin	QQLNPCKNIL	gamma-gliadin	GQQQGQGQQGHYPSMTSPHQTGQGQKGY	HMW-glutenin
QTIPTMCNVY	alpha-gliadin	QPQQPFPQPQQAHLPFPQQ	gamma-gliadin	LQPQNPSLQQPQEQVPL	alpha-gliadin	PQPQPFPSQQPYLQLQPFPQPQQPYSQPQP	alpha-gliadin	LPYPQPQLPYPQPQPF	alpha-gliadin	PQPFPQLQPFPPQLPYPQPQ	alpha-gliadin	QQQCCQELAQIPQQL	gamma-gliadin	GQQTTVSPHQGQQTTVSPHPGQ	HMW-glutenin
RPQQPYPQPQPQ	alpha-gliadin	QPQQPFPQPQQPQQPFPQQPQQPFPQPQQP	gamma-gliadin	LQPQNPSQQEPQEQVPL	alpha-gliadin	PQQPYPQPQPFPPQQPYPQPQPFAPQQP	alpha-gliadin	LQLQNPSQQQPQEQVPL	alpha-gliadin	PQPFPQPQPFPPQQPYPQP	alpha-gliadin	QQQLNPCKNF	gamma-gliadin	GQQTTVSPHQGQQTTVSPHPGQQTTVSPH	HMW-glutenin
RPQQPYPQPQPQY	alpha-gliadin	QPVQGQGIIQPQQPAQYEVIR	gamma-gliadin	LQPQNPSQQQPQEQVPL	alpha-gliadin	PSQQQPQEQVPL	alpha-gliadin	LQLQPFPQPQ	alpha-gliadin	PQQPYPQPQPFPSQH	alpha-gliadin	QQQVNPCKNF	gamma-gliadin	GQQTTVSPHQGQQTTVSPHQG	HMW-glutenin
RPQQPYPQSQPQY	alpha-gliadin	QQPFPQPHQPFSQQPQ	gamma-gliadin	LQPQNPSQQQSQEQVPL	alpha-gliadin	PSQQQPQEQVPLVQQQ	alpha-gliadin	LQLQPFPQPQL	alpha-gliadin	PQQPYPQPQPFPSQHPY	alpha-gliadin	QQVPQPQQPQQPF	gamma-gliadin	GQQTTVSPHQGQQTTVSPHQGQQTTVSPHQGQ	HMW-glutenin
SFPPQQPYPQQQPQ	alpha-gliadin	RPQQLFPQWQPLPQQPP	gamma-gliadin	LQPQQPISQQ	alpha-gliadin	PYPQLQPFPQPQLPYPQPQLPYP	alpha-gliadin	LQLQPFPQPQLPY	alpha-gliadin	PQQPYPQPQPFPSQQPYPQPQP	alpha-gliadin	QTLPSMCNVY	gamma-gliadin	GQQTTVSPHQGQQTTVSPHQGQQTTVSPHQGQQTTVSPHQG	HMW-glutenin
VPVPQLQPQNPSQQQPQ	alpha-gliadin	RPQQLFPQWQPLPQQPPF	gamma-gliadin	LQPQQPISQQQ	alpha-gliadin	PYPQLQPFPQPQLPYPQPQLPYPQPQP	alpha-gliadin	LQLQPFPQPQLPYPQPHLPY	alpha-gliadin	PQQPYPQPQPFPSQQPYPQSQPFPPQ	alpha-gliadin	RTLPNMCNVY	gamma-gliadin	HPGQQTTVSPHQGQQTTVSPH	HMW-glutenin
VPVPQLQPQNPSQQQPQEQVPLVQ	alpha-gliadin	SGQVQWPQQQQPFPQQAQQTFPQPQQIFPHQPQQQFPQPQQ	gamma-gliadin	LQPQQPISQQQAQ	alpha-gliadin	QFPGQQQPFPPQEPYPQPQPFPSQQP	alpha-gliadin	LQLQPFPQPQLPYPQPQLPY	alpha-gliadin	PQQPYPQPQPFPSQQPYQQPQP	alpha-gliadin	RTLPTMCN	gamma-gliadin	HPGQQTTVSPHQGQQTTVSPHPG	HMW-glutenin
VQPQQIPQFEEIRNL	alpha-gliadin	VQGQGIIQPQQPAQLEVIR	gamma-gliadin	LQPQQPISQQQAQQ	alpha-gliadin	QFPGQQQPFPPQEPYPQPQPFPSQQPY	alpha-gliadin	LQLQPFPQPQLPYPQPQPF	alpha-gliadin	PQQPYPQPQPFQPQQP	alpha-gliadin	SIIMQQEQRQGVQ	gamma-gliadin	HPGQQTTVSPHQGQQTTVSPHPGQQ	HMW-glutenin
VQPQQLPQFQEIRNL	alpha-gliadin	VQGQGIIQPQQPAQYEVIR	gamma-gliadin	LQPQQPISQQQAQQQQ	alpha-gliadin	QFPGQQQPFPPQQPYPQPQPFPSQQPY	alpha-gliadin	LQLQPFPQPQLSY	alpha-gliadin	PQQPYPQPQPFSSQQPYPQPQPFP	alpha-gliadin	SLQQQLNPC	gamma-gliadin	HPGQQTTVSPHQGQQTTVSPHPGQQT	HMW-glutenin
VQQQQFPGQQQ	alpha-gliadin	VVGSLVIQTLPMLCNVHVPPYCSPF	gamma-gliadin	LQPQQPISQQQAQQQQQ	alpha-gliadin	QLFPQPQPFPPQLPYPQPEP	alpha-gliadin	LQLQPFPQPQPF	alpha-gliadin	PSQQQPQEQVPL	alpha-gliadin	SLQQQLNPCKN	gamma-gliadin	HPGQQTTVSPHQGQQTTVSPHPGQQTTVSPH	HMW-glutenin
VRVPVPQLQPQNPSQQQPQEQVPL	alpha-gliadin	YPEQPQQPFPWQQPTIQL	gamma-gliadin	LQPQQPISQQQAQQQQQQQ	alpha-gliadin	QLQPQNPSQQQPQEQVPL	alpha-gliadin	LQLQPFPQPQPFPPQLPYPQPQ	alpha-gliadin	PSQQQPQEQVPLVQE	alpha-gliadin	SLQQQLNPCKNF	gamma-gliadin	HPGQQTTVSPHQGQQTTVSPHQG	HMW-glutenin
YLQPQQPISQQ	alpha-gliadin	ELYYGSPYHVSVEQPSASLK	HMW-glutenin	LQPQQPISQQQAQQQQQQQQQQ	alpha-gliadin	QPQPFLPQLPYPQPQP	alpha-gliadin	LQNPSQQQPQEQVPL	alpha-gliadin	PSQQQPQEQVPLVQQ	alpha-gliadin	SLQQQMNPCKNF	gamma-gliadin	HPGQQTTVSPHQGQQTTVSPHQGQQ	HMW-glutenin
YLQPQQPISQQQ	alpha-gliadin	ELYYGSPYHVSVEQPSASLKVAK	HMW-glutenin	LQPQQPISQQQAQQQQQQQQQQQQQ	alpha-gliadin	QPQPFPQPQPFPQPQPFPQPQPFPPQQ	alpha-gliadin	LQPFPQPQLPYPQPQLPY	alpha-gliadin	PSQQQPQEQVPLVQQQ	alpha-gliadin	SLQQQVNPCKNF	gamma-gliadin	HPGQQTTVSPHQGQQTTVSPHQGQQTT	HMW-glutenin
YLQPQQPISQQQAQQQ	alpha-gliadin	GQQQGQGQQGHYP	HMW-glutenin	LQPQQPISQQQAQQQQQQQQQQQQQIL	alpha-gliadin	QPQQQYPAGQGSFQPSQQNPQAQGSVQPQQLPQFEEIR	alpha-gliadin	LQPFPQPQLPYPQPQLPYPQPQPF	alpha-gliadin	PYPQPQPFPPQLPYPQPQP	alpha-gliadin	SLVLQTLPSMCN	gamma-gliadin	HPGQQTTVSPHQGQQTTVSPHQGQQTTVSPH	HMW-glutenin
YSQPQQPISQQQ	alpha-gliadin	GQQQGQGQQGHYPSMT	HMW-glutenin	LQPQQPISQQQAQQQQQQQQQQQQQQQ	alpha-gliadin	QPQQQYPSSQVSFLPSQLNPQAQGSVQPQQLPQFAEIR	alpha-gliadin	LQPFPQPQLSY	alpha-gliadin	QFPGQQEQFPPQQPYPQPQPFPSQQPY	alpha-gliadin	TIIHSIIMQQE	gamma-gliadin	HQGQQTTVSPHPGQQTTVSPHQGQQTTVSPH	HMW-glutenin
YSQPQQPISQQQQ	alpha-gliadin	GQQQGQGQQGHYPSMTSPHQTGQGQKGY	HMW-glutenin	LQTLPAMCN	alpha-gliadin	QPYPQPQPFLPQLPYPLPQPFSPQQPYPQP	alpha-gliadin	LQPQNPSLQQPQEQVPL	alpha-gliadin	QFPGQQQPFPPQEPYPQPQPFPS	alpha-gliadin	TIIHSIIMQQEQ	gamma-gliadin	HQGQQTTVSPHPGQQTTVSPHQGQQTTVSPHQG	HMW-glutenin
YSQPQQPISQQQQQ	alpha-gliadin	LVYYPTSPQQPGQLQ	HMW-glutenin	LWQIPEQSQCQ	alpha-gliadin	QQQFPSGQGFIQQPQQP	alpha-gliadin	LQPQNPSQQEPQEQVPL	alpha-gliadin	QFPGQQQPFPPQEPYPQPQPFPSQQP	alpha-gliadin	TQQPQQPFPQ	gamma-gliadin	HQGQQTTVSPHQGQ	HMW-glutenin
YSQPQQPISQQQQQQQ	alpha-gliadin	PGQGYNPGGTSPLH	HMW-glutenin	NIAHASSQVLQQSSY	alpha-gliadin	QQQIPLMQQQ	alpha-gliadin	LQPQNPSQQHPQEQVPL	alpha-gliadin	QFPGQQQPFPPQEPYPQPQPFPSQQPY	alpha-gliadin	VLQTIPTMCN	gamma-gliadin	HQGQQTTVSPHQGQQ	HMW-glutenin
AIILQQQQQL	avenin	PTSPQQPGQGQQPGQLQ	HMW-glutenin	NIAHASSQVLQQSTY	alpha-gliadin	QQRQQPSSQVSFQQPQQQYPSSQVSFLPSQLNPQAQGSVQPQQLPQFAEIR	alpha-gliadin	LQPQNPSQQQPQ	alpha-gliadin	QFPGQQQPFPPQQPYPQPQPFPS	alpha-gliadin	VLQTLPSMCN	gamma-gliadin	HQGQQTTVSPHQGQQTT	HMW-glutenin
AQIPEQF	avenin	PVALSQVVRQYEQ	HMW-glutenin	NIAHESSQVL	alpha-gliadin	QYPGQQPPFPPQQPYPQPQPFPS	alpha-gliadin	LQPQNPSQQQPQE	alpha-gliadin	QFPGQQQPFPPQQPYPQPQPFPSQQP	alpha-gliadin	VMQQQCCQQL	gamma-gliadin	HQGQQTTVSPHQGQQTTVS	HMW-glutenin
AQISEQARCQ	avenin	PVALSQVVRQYEQQ	HMW-glutenin	NIAHESSQVLQQSSY	alpha-gliadin	RVPVPQLQPQNPSQQQPQ	alpha-gliadin	LQPQNPSQQQPQEQVPL	alpha-gliadin	QFPGQQQPFPPQQPYPQPQPFPSQQPY	alpha-gliadin	VQGQGIIQPQQPAQL	gamma-gliadin	HQGQQTTVSPHQGQQTTVSPH	HMW-glutenin
AQISEQARCQAVC	avenin	QPGQGQQPGQRQQGYYPTTPQQPGQGQQP	HMW-glutenin	NIAHGSSQVL	alpha-gliadin	SIAHGSSQVLQQSTYQ	alpha-gliadin	LQPQNPSQQQSQEQVPL	alpha-gliadin	QFPGQQQQFPPQQPYPQPQPFPS	alpha-gliadin	VSIILPRSDCQVM	gamma-gliadin	HQGQQTTVSPHQGQQTTVSPHPGQQ	HMW-glutenin
CTTTPCSTITPAIY	avenin	RVVDQQLVGQLPWSTGL	HMW-glutenin	NIAHGSSQVLQESTY	alpha-gliadin	SIAHGSSQVLQQSTYQL	alpha-gliadin	LQPQQPISQQ	alpha-gliadin	QLFPQPQPFPPQLPYPQPEP	alpha-gliadin	VYVPPECSI	gamma-gliadin	HQGQQTTVSPHQGQQTTVSPHPGQQT	HMW-glutenin
CTTTPCSTITPTIY	avenin	SATSPQQPGQGQGQQETYPIA	HMW-glutenin	NIAHGSSQVLQESTYQ	alpha-gliadin	SIAYGSSQVLQQSTYQ	alpha-gliadin	LQPQQPISQQQ	alpha-gliadin	QLQPFPQPQLPYPQPQPVQPQQ	alpha-gliadin	VYVPPECSII	gamma-gliadin	HQGQQTTVSPHQGQQTTVSPHPGQQTTVSPHQGQ	HMW-glutenin
GQPQQQVPIEIR	avenin	SLQQPGQGQQGHYPA	HMW-glutenin	NIAQGRSQVL	alpha-gliadin	SIAYGSSQVLQQSTYQL	alpha-gliadin	LQPQQPISQQQAQ	alpha-gliadin	QLQPFPQPQPPYPHPQLPYPQPQP	alpha-gliadin	HQQGGGFGGGL	HMW-glutenin	HQGQQTTVSPHQGQQTTVSPHPGQQTTVSPHQGQQTTVSPHPGQQ	HMW-glutenin
GQQQQQQLQEQLTPCTTF	avenin	SLQQPGQGQQIGKGKQGY	HMW-glutenin	NLALQTLPALCN	alpha-gliadin	SQVLQQSTYQ	alpha-gliadin	LQPQQPISQQQAQQ	alpha-gliadin	QPFPPQQLFPQPQPFLPQLPYPQPQPFPPQ	alpha-gliadin	QCERELQESSLEAC	HMW-glutenin	HQGQQTTVSPHQGQQTTVSPHPGQQTTVSPHQGQQTTVSPHPGQQT	HMW-glutenin
GQSQQQQQPGQRQLL	avenin	SLQQPGQGQQIGKGKQGYYPT	HMW-glutenin	NLALQTLPAMCN	alpha-gliadin	SSQQNPQAQGSVQPQQLPQFQEIR	alpha-gliadin	LQPQQPISQQQAQQQ	alpha-gliadin	QPFPQPQLPYPQPQLPYPQPQPFRPQQP	alpha-gliadin	VYYPTSPQQPGQL	HMW-glutenin	HQGQQTTVSPHQGQQTTVSPHQG	HMW-glutenin
IYVPVQCQQQQQL	avenin	SPHQGQQTTVSPHQGQQTTVSPHQG	HMW-glutenin	NLALQTLPAVCN	alpha-gliadin	VPQLQPQNPSQQQP	alpha-gliadin	LQPQQPISQQQAQQQQ	alpha-gliadin	QPFSPQQPYPQPQPFPSQQPYPQPQPF	alpha-gliadin	CCQQLPQIPQQSRY	LMW-glutenin	HQGQQTTVSPHQGQQTTVSPHQGQ	HMW-glutenin
KAIQSVEEAIIQQQP	avenin	SPHQGQQTTVSPHQGQQTTVSPHQGQ	HMW-glutenin	NLALQTLPSMCN	alpha-gliadin	VPQLQPQNPSQQQPQ	alpha-gliadin	LQPQQPISQQQAQQQQQ	alpha-gliadin	QPQLPYPQPQLPYPQPQPSRPQ	alpha-gliadin	CQQLPQIPE	LMW-glutenin	HQGQQTTVSPHQGQQTTVSPHQGQQ	HMW-glutenin
LDTTCSQGY	avenin	SPHQGQQTTVSPHQGQQTTVSPHQGQQTTVSPH	HMW-glutenin	NPQAQGSVQPQQLPQFAEIRNL	alpha-gliadin	VPQLQPQNPSQQQPQEQVP	alpha-gliadin	LQPQQPISQQQAQQQQQQQ	alpha-gliadin	QPQNPYQQQPQEQVPLMQQQQFPGQQQPIPPQQP	alpha-gliadin	ILQQLNPCKVF	LMW-glutenin	HQGQQTTVSPHQGQQTTVSPHQGQQPGEQ	HMW-glutenin
LQQCSPTPY	avenin	SPHQPGQWQQPGQGQQGY	HMW-glutenin	PQNPSQQQPQEQVPLIQ	alpha-gliadin	VPQLQPQNPSQQQPQEQVPL	alpha-gliadin	LQPQQPISQQQAQQQQQQQQ	alpha-gliadin	QPQPFPPQLPYPQPQPYP	alpha-gliadin	LQPHQLAQL	LMW-glutenin	HQGQQTTVSPHQGQQTTVSPHQGQQTT	HMW-glutenin
LQTQVEQL	avenin	TSPHQPGQWQQPGQGQQGY	HMW-glutenin	PQPFPQLQPFPPQLPYPQPQ	alpha-gliadin	VPQLQPQNPSQQQPQEQVPLVQQ	alpha-gliadin	LQPQQPISQQQAQQQQQQQQQQQQQ	alpha-gliadin	QPQPFPPQLPYPQPQPYPPQ	alpha-gliadin	LQQLNPCKVF	LMW-glutenin	HQGQQTTVSPHQGQQTTVSPHQGQQTTVS	HMW-glutenin
LQTQVEQLSSC	avenin	TSPQQPGQGQQLGQGQQPGHGQ	HMW-glutenin	PQPQLPYLQPQPF	alpha-gliadin	VPVPQLQPQHPSQQQPQ	alpha-gliadin	LQPQQPISQQQAQQQQQQQQQQQQQIL	alpha-gliadin	QPQPFPQPQPFPQPQPFPQPQ	alpha-gliadin	LQQQCIPVAM	LMW-glutenin	HQGQQTTVSPHQGQQTTVSPHQGQQTTVSPH	HMW-glutenin
LQTQVEQLSSCQIVQY	avenin	TSPQQPGQGQQLGQGQQPGHGQQ	HMW-glutenin	PQPQLPYPQPQPF	alpha-gliadin	VPVPQLQPQNPSIQQP	alpha-gliadin	LWQIPEQSQCQ	alpha-gliadin	QPQPFPSQQPYLQVQPYPQPQP	alpha-gliadin	LQQQCSPVAM	LMW-glutenin	HQGQQTTVSPHQGQQTTVSPHQGQQTTVSPHQGQ	HMW-glutenin
NVAEAIRQQQPQ	avenin	TSPQQPGQGQQLGQGQQPGHGQQL	HMW-glutenin	PQPQPFPAQQPYPQPQ	alpha-gliadin	VPVPQLQPQNPSQQEPQEQVP	alpha-gliadin	NIAHESSQVL	alpha-gliadin	QPQPVQPQQP	alpha-gliadin	LQQQCSPVP	LMW-glutenin	HQGQQTTVSPHQGQQTTVSPHQGQQTTVSPHQGQQTTVS	HMW-glutenin
NVAEAIRQQQPQQ	avenin	TSPQQPGQGQQLGQGQQPGHGQQLVQ	HMW-glutenin	PQPQPQYPQPQQPISQQ	alpha-gliadin	VPVPQLQPQNPSQQEPQEQVPLV	alpha-gliadin	NIAHGSSQVL	alpha-gliadin	QPQQQYPSRQGSFQPSQQNPQAQGSV	alpha-gliadin	LQQQCSPVPMPQ	LMW-glutenin	HQGQQTTVSPHQGQQTTVSPHQGQQTTVSPHQGQQTTVSPH	HMW-glutenin
NVAEAIRQQQPQQQW	avenin	TTVSPHQGQQTTVSPHQGQQTTVSPH	HMW-glutenin	PQPQPQYPQPQQPISQQQAQQAQ	alpha-gliadin	VPVPQLQPQNPSQQEPQEQVPLVQQ	alpha-gliadin	NIAHGSSQVLQESTY	alpha-gliadin	QQPFPPQQPYPQPQPFPPQQPFPQPQPF	alpha-gliadin	QLQQIPEQSRY	LMW-glutenin	KGGSFYPGETTPPQQLQ	HMW-glutenin
NVVESIRQQ	avenin	TTVSPHQGQQTTVSPHQGQQTTVSPHQGQ	HMW-glutenin	PQQPYPQPQPQQPI	alpha-gliadin	VPVPQLQPQNPSQQEPQEQVPLVQQQQ	alpha-gliadin	NIAQGRSQVL	alpha-gliadin	QQPYPQPQPFSSQQPYPQPQPFPP	alpha-gliadin	QQLNPCKIF	LMW-glutenin	LQQPTQGQQRQQPGQGQQ	HMW-glutenin
NVVESIRQQQ	avenin	TTVSPHQGQQTTVSPHQGQQTTVSPHQGQQTT	HMW-glutenin	PQQPYPQPQPQQPISQQQ	alpha-gliadin	VPVPQLQPQNPSQQQ	alpha-gliadin	NIVHGKSQVL	alpha-gliadin	QQQLTPCMDVVLQQ	alpha-gliadin	QQLNPCKVF	LMW-glutenin	RVVDQQLVGQLPWSTGL	HMW-glutenin
QKLNPCRDAL	avenin	TVSPHPGQQTTVSPHQGQQTTVSPH	HMW-glutenin	PQQPYPQPQPQQPISQQQAQ	alpha-gliadin	VPVPQLQPQNPSQQQP	alpha-gliadin	NVAHAIIM	alpha-gliadin	QQQPQEQVSLVQQQQFIGQQQPFPPQQP	alpha-gliadin	QQLPQIPEQF	LMW-glutenin	SLQQPGQGQQGHY	HMW-glutenin
QQQQQPGQRQLL	avenin	TVSPHQGQQTTVSPHPGQQTTVSPHQG	HMW-glutenin	PQQPYPQPQPQQPISQQQAQQ	alpha-gliadin	VPVPQLQPQNPSQQQPEEQVSLVQQQ	alpha-gliadin	NVVHAIILH	alpha-gliadin	QQQQYPGQQQPFPPQQPYPQPQPFP	alpha-gliadin	QQPVIPQQPPF	LMW-glutenin	SLQQPGQGQQIGKGQQGY	HMW-glutenin
SFGQPQQQVPVEIM	avenin	TVSPHQGQQTTVSPHQGQQPGEQP	HMW-glutenin	PQSQPQYSQPQQPISQQQQQQQQQQQ	alpha-gliadin	VPVPQLQPQNPSQQQPQ	alpha-gliadin	PFLQPQLPY	alpha-gliadin	RIPVPQLQPQNPSQQQPQEQVPLVQQQQF	alpha-gliadin	QQPVLPQQPPFSQQ	LMW-glutenin	SLQQPGQGQQQGQGQQGYY	HMW-glutenin
SSCQIVQHQCCQQL	avenin	TVSPHQGQQTTVSPHQGQQTTVSP	HMW-glutenin	PSLQQPQEQVPL	alpha-gliadin	VPVPQLQPQNPSQQQPQE	alpha-gliadin	PLAQGSVQPQQLPQFEEIRNL	alpha-gliadin	RVPVPQLQPQNPSQQEPQEQVPLVQQQ	alpha-gliadin	QQPVLPQQQIPY	LMW-glutenin	SLWQPGQGQQPGQGQQGY	HMW-glutenin
TQVEQLSSCQIVQY	avenin	TVSPHQGQQTTVSPHQGQQTTVSPH	HMW-glutenin	PSQQPLPQPQPF	alpha-gliadin	VPVPQLQPQNPSQQQPQEQ	alpha-gliadin	PQAQGSVQPQQLPQFEEIRNL	alpha-gliadin	SCQVSFQQPLQQYPLGQGSFRPS	alpha-gliadin	QQQCCQQLPQIPEQF	LMW-glutenin	SMTSPHQTGQGQKGY	HMW-glutenin
TTTPCSTITPTIY	avenin	TVSPHQGQQTTVSPHQGQQTTVSPHQG	HMW-glutenin	PSQQQPQEQVPL	alpha-gliadin	VPVPQLQPQNPSQQQPQEQVP	alpha-gliadin	PQNPSQQQPQEQVPLIQ	alpha-gliadin	SFQQPQQQYPSGQG	alpha-gliadin	SIILQEQQQ	LMW-glutenin	SQQQPAQGQQGHYPASQQQPGQGQQGHY	HMW-glutenin
VPVQCQQQQQL	avenin	TVSPHQGQQTTVSPHQGQQTTVSPHQGQQTT	HMW-glutenin	QFPGQQQPFPPQQPYPQPQPF	alpha-gliadin	VPVPQLQPQNPSQQQPQEQVPL	alpha-gliadin	PQPFPQLQPFPPQLPYPQPQ	alpha-gliadin	SFRPSQQNPQAQGSVQPQ	alpha-gliadin	SIILQEQQQVQ	LMW-glutenin	SRQQSGQGQQPGQGQQSGQGQEGQQPGQGQQAY	HMW-glutenin
VQATSTQPQQQQQQGQQQQQGL	avenin	VSPHPGQQTTVSPHQGQQTTVSPH	HMW-glutenin	QFPPQQPYPQPQPFPSQQPY	alpha-gliadin	VPVPQLQPQNPSQQQPQEQVPLV	alpha-gliadin	PQPHLPYPQPQPF	alpha-gliadin	SFRPSQQNPQAQGSVQPQQLPQ	alpha-gliadin	SIVLQEQQHGQ	LMW-glutenin	SYYPGQASPQQPGQGQQPGK	HMW-glutenin
YCTTTPCSTITPTIY	avenin	VSPHQGQQTTVSPHQGQQTTVSPH	HMW-glutenin	QHLQPQQPISQQ	alpha-gliadin	VPVPQLQPQNPSQQQPQEQVPLVQ	alpha-gliadin	PQPQLPYPQPQLPYPQPQPF	alpha-gliadin	SIAHGSSQVLQQ	alpha-gliadin	SIVLQEQQHGQG	LMW-glutenin	TEVPSKGGSFYPGGTA	HMW-glutenin
AIIMQQEQQGIQ	gamma-gliadin	VSPHQGQQTTVSPHQGQQTTVSPHQ	HMW-glutenin	QHNIAHGSSQVLQESTY	alpha-gliadin	VPVPQLQPQNPSQQQPQEQVPLVQQ	alpha-gliadin	PQPQLPYPQPQPF	alpha-gliadin	SIAHGSSQVLQQSTY	alpha-gliadin	SIVLQEQQHGQGF	LMW-glutenin	TEVPSKGGSFYPGGTAP	HMW-glutenin
AIIMQQEQQGIQIL	gamma-gliadin	VSPHQGQQTTVSPHQGQQTTVSPHQG	HMW-glutenin	QLIPCRDVVLQQ	alpha-gliadin	VPVPQLQPQNPSQQQPQEQVPLVQQK	alpha-gliadin	PQPQPFPPQLPYPQ	alpha-gliadin	SIAHGSSQVLQQSTYQ	alpha-gliadin	SQQQQPPFSQQQPPF	LMW-glutenin	TEVPSKGGSFYPGGTAPPLQQGGW	HMW-glutenin
ANIDAGIGGQ	gamma-gliadin	VSPHQGQQTTVSPHQGQQTTVSPHQGQ	HMW-glutenin	QLIPCRDVVLQQH	alpha-gliadin	VPVPQLQPQNPSQQQPQEQVPLVQQQ	alpha-gliadin	PQPQPQYPQPQQPISQQ	alpha-gliadin	SIAYGSSQVLQQSTYQ	alpha-gliadin	SQQQQPVIPQQPPF	LMW-glutenin	TQGQQRQQPGQGQQLRQGQQGQQSGQGQPR	HMW-glutenin
ANINEQSRCPA	gamma-gliadin	VSPHQGQQTTVSPHQGQQTTVSPHQGQQPG	HMW-glutenin	QLQNPSQQQPQEQVPL	alpha-gliadin	VPVPQLQPQNPSQQQPQEQVPLVQQQQ	alpha-gliadin	PQPQSFLPQLPYPQPQPF	alpha-gliadin	SKVSQQSYQL	alpha-gliadin	SQQQQPVLPQQPPFSQQ	LMW-glutenin	TSLQQPGQGQQPGQGYYPTSPQQP	HMW-glutenin
ANINEQSRCPAIQ	gamma-gliadin	VSPHQGQQTTVSPHQGQQTTVSPHQGQQTTVSPH	HMW-glutenin	QLQPFPQPQLPY	alpha-gliadin	VPVPQLQPQNPSQQQPQEQVPLVQQQQF	alpha-gliadin	PQQPYPQPQPFSSQQPYPQPQ	alpha-gliadin	SQAQGSVQPQQLPQ	alpha-gliadin	SQQQQQPILPQQPPFSQQ	LMW-glutenin	TSPQQPGQGQQLGQGQQPGHGQ	HMW-glutenin
ANINEQSRCPAIQT	gamma-gliadin	VSPHQGQQTTVSPHQGQQTTVSPHQGQQTTVSPHQG	HMW-glutenin	QPFPQPQLPY	alpha-gliadin	VPVPQLQPQNPSQQQPQEQVS	alpha-gliadin	PQQPYPQPQPQQPISQQQ	alpha-gliadin	SQQPFPRPQPFLPQLPYPQP	alpha-gliadin	VLQQLNPCKVF	LMW-glutenin	TSPQQPGQGQQLGQGQQPGHGQQ	HMW-glutenin
ANINEQSRCPAIQTIVH	gamma-gliadin	VSPHQGQQTTVSPHQGQQTTVSPHQGQQTTVSPHQGQQTT	HMW-glutenin	QPQPQYPQPQQP	alpha-gliadin	VPVPQLQPQNPSQQQSQEQVPL	alpha-gliadin	PQQPYPQPQPQQPISQQQAQ	alpha-gliadin	SQQQPQEQVPLVQE	alpha-gliadin	VLQQQCCQQLPQIPEQF	LMW-glutenin	TTVSPHQGQQTTVSPHQGQQTT	HMW-glutenin
AQGLGIIQPQQPAQL	gamma-gliadin	VVDQQLVGQLPWSTGLQM	HMW-glutenin	QPSQLNPQAQGSVQPQ	alpha-gliadin	VPVPQLQPQNPSQQQSQEQVPLVQ	alpha-gliadin	PQQQPYPQPQPF	alpha-gliadin	SQVLQQSSYQQ	alpha-gliadin	VLQQQCCQQLPQIPEQI	LMW-glutenin	TTVSPHQGQQTTVSPHQGQQTTVS	HMW-glutenin
AQLEAIRSL	gamma-gliadin	WYYPDQTSSQQSWQGQQGYH	HMW-glutenin	QPSQLNPQAQGSVQPQQLPQF	alpha-gliadin	VQPYPQPQPFPPQLPYPQPQ	alpha-gliadin	PQQSYPQPQPFP	alpha-gliadin	SQVLQQSTYQ	alpha-gliadin			TTVSPHQGQQTTVSPHQGQQTTVSPHQG	HMW-glutenin
AQMEAIRSL	gamma-gliadin	AQPPQQSSPQSQQPYPQEPQQLFPQSQQPQQPLPQPQQPQ	LMW-glutenin	QPSQLNPQAQGSVQPQQLPQFAEIR	alpha-gliadin	VRVPVPQLQPQNPS	alpha-gliadin	PSQQPLPQPQPF	alpha-gliadin	SYPQPQPQYPQPQQP	alpha-gliadin			TVSPHQGQQTTVSPHQGQQTTVSPH	HMW-glutenin
AQMEAIRTL	gamma-gliadin	LPQQPPFWQQQQPVLPQQP	LMW-glutenin	QPSQLNPQAQGSVQPQQLPQFAEIRNL	alpha-gliadin	VRVPVPQLQPQNPSQQEPQEQVP	alpha-gliadin	PSQQQPQEQVPL	alpha-gliadin	TAVRVPVPQLQPQSPSQQQPQEQVPLVQQQ	alpha-gliadin			TVSPHQGQQTTVSPHQGQQTTVSPHQG	HMW-glutenin
AQQQPSIEEQHQL	gamma-gliadin	METSHIPGLEKPSQQQPLP	LMW-glutenin	QPSQQNPQAQGF	alpha-gliadin	VRVPVPQLQPQNPSQQEPQEQVPLVQQ	alpha-gliadin	QFPGQQQPFPPQQPY	alpha-gliadin	VIVPQLQPLNPSQQQPQEQVPLVQQQ	alpha-gliadin			TVSPHQGQQTTVSPHQGQQTTVSPHQGQQTT	HMW-glutenin
ASIVADIGGQ	gamma-gliadin	PQQPFPQQSQQPFPHQPQQSSPQPQQPFPQPQP	LMW-glutenin	QQHNIAHESSQVL	alpha-gliadin	VRVPVPQLQPQNPSQQEPQEQVPLVQQQ	alpha-gliadin	QFPGQQQPFPPQQPYPQPQPF	alpha-gliadin	VPQLQPQNPSQQQPQ	alpha-gliadin			TVVPPKGGSFYPGETTP	HMW-glutenin
ASIVAGIGGQ	gamma-gliadin	QPFPPQQPPFSQQQQPFPQQPP	LMW-glutenin	QQHNIAHESSQVLQQSSY	alpha-gliadin	VRVPVPQLQPQNPSQQEPQEQVPLVQQQQF	alpha-gliadin	QFPPQQPYPQPQPFPSQQPY	alpha-gliadin	VPVPQLEPQNPSQQQPQ	alpha-gliadin			VSPHQGQQTTVSPH	HMW-glutenin
ASIVAGISGQ	gamma-gliadin	QPFPQPQQPQQPFPQPQPQLQQSIPQLQQ	LMW-glutenin	QQHNIAHGSSQVLQESTY	alpha-gliadin	VRVPVPQLQPQNPSQQQP	alpha-gliadin	QHNIAHASSQVL	alpha-gliadin	VPVPQLEPQNPSQQQPQEQVPLVQQQ	alpha-gliadin			VSPHQGQQTTVSPHPGQQTTVSPH	HMW-glutenin
CCQQLAQIPQQL	gamma-gliadin	QPFPQQPPFWQQXPFPQQPP	LMW-glutenin	QQLIPCRDVVL	alpha-gliadin	VRVPVPQLQPQNPSQQQPQ	alpha-gliadin	QHNIAHGSSQVLQESTY	alpha-gliadin	VPVPQLQPQNPSQ	alpha-gliadin			VSPHQGQQTTVSPHPGQQTTVSPHQGQQTT	HMW-glutenin
CLQQPQHQFPQPT	gamma-gliadin	QPQQPFPQQPQQPVPQQPQ	LMW-glutenin	QQLLQQQIL	alpha-gliadin	VRVPVPQLQPQNPSQQQPQEQVP	alpha-gliadin	QILEQSQCQAIH	alpha-gliadin	VPVPQLQPQNPSQQEPQ	alpha-gliadin			VSPHQGQQTTVSPHQG	HMW-glutenin
CQQPQQTIPQPHQTF	gamma-gliadin	QPQQPYPQQPQQPFPQPPQQPYPQQPQQP	LMW-glutenin	QQNPQAQGSVQPQQLPQFEEIRNL	alpha-gliadin	VRVPVPQLQPQNPSQQQPQEQVPL	alpha-gliadin	QILEQSQCQAIHN	alpha-gliadin	VPVPQLQPQNPSQQEPQEQVPLVQ	alpha-gliadin			VSPHQGQQTTVSPHQGQQTTVSPH	HMW-glutenin
FLQPQQPQQSFPQQQQPL	gamma-gliadin	QQPPFSQQQPTLSQQPPFSQQQQPVLPQQ	LMW-glutenin	QQPLQQYPL	alpha-gliadin	VRVPVPQLQPQNPSQQQPQEQVPLVQQQ	alpha-gliadin	QILEQSQCQAIHNVVH	alpha-gliadin	VPVPQLQPQNPSQQEPQEQVPLVQQ	alpha-gliadin			VSPHQGQQTTVSPHQGQQTTVSPHPG	HMW-glutenin
FQLVQGQGIIQPQQPAQL	gamma-gliadin	QQPPFSQQQQSPFSQQQQQPPFAQQQQPP	LMW-glutenin	QQPNIAHASSQVSQQSY	alpha-gliadin	VRVPVPQLQPQNPSQQQPQEQVS	alpha-gliadin	QILQQQLIPCMDVVLQQH	alpha-gliadin	VPVPQLQPQNPSQQQ	alpha-gliadin			VSPHQGQQTTVSPHQGQQTTVSPHQG	HMW-glutenin
FVLPQQQAQF	gamma-gliadin	RTTTSVPFDVGTGVGA	LMW-glutenin	QQPNIAHASSQVSQQSYQ	alpha-gliadin	VRVPVPQLQPQNPSQQQSQEQVP	alpha-gliadin	QIPEQSQCQAIH	alpha-gliadin	VPVPQLQPQNPSQQQP	alpha-gliadin			VSPHQGQQTTVSPHQGQQTTVSPHQGQQ	HMW-glutenin
GIIQPQQPAQL	gamma-gliadin	SHIPGLEKPSQQQPLP	LMW-glutenin	QQPQEQYPSGQGSF	alpha-gliadin	VVLQQPNIAHAS	alpha-gliadin	QIPEQSQCQAIHN	alpha-gliadin	VPVPQLQPQNPSQQQPQ	alpha-gliadin			VSPHQGQQTTVSPHQGQQTTVSPHQGQQPGEQ	HMW-glutenin
GIIQPQQPAQLEGIRSL	gamma-gliadin	SHIPGLEKPSQQQPLPLQ	LMW-glutenin	QQPQQQYPL	alpha-gliadin	AIQSVEEAIIQQQPQQ	avenin	QIPEQSQCQAIHNV	alpha-gliadin	VPVPQLQPQNPSQQQPQEQ	alpha-gliadin			VSPHQGQQTTVSPHQGQQTTVSPHQGQQT	HMW-glutenin
GILVQGQGIIQPQQPAQL	gamma-gliadin	SHIPGLERPSQQQPLPPQQTL	LMW-glutenin	QQPQQQYPLGQGSF	alpha-gliadin	AIQSVEEAIIQQQPQQQ	avenin	QIPEQSQCQAIHNVVH	alpha-gliadin	VPVPQLQPQNPSQQQPQEQV	alpha-gliadin			VSPHQGQQTTVSPHQGQQTTVSPHQGQQTT	HMW-glutenin
GPSGQVQWPQQQPF	gamma-gliadin	SQKQQPVLPQQP	LMW-glutenin	QQPQQQYPSGQGF	alpha-gliadin	ATSTQPQQQQQQGQQQQQGLGSSQPQQQTQLDQGWIAVIGT	avenin	QLHNIAHESSQVL	alpha-gliadin	VPVPQLQPQNPSQQQPQEQVP	alpha-gliadin			VVPSKAGSFYPSETTPSQQ	HMW-glutenin
GQGIIQPQQLAQL	gamma-gliadin	SQQQQLFPQQPSFSQQQPPFW	LMW-glutenin	QQPQQQYPSGQGFF	alpha-gliadin	IMQQQSQQQWQERQQQAQHK	avenin	QLIPCMDVVLQQH	alpha-gliadin	VPVPQLQPQNPSQQQPQEQVPL	alpha-gliadin			VYYPTSPQQPGQLQ	HMW-glutenin
GQGIIQPQQPAQL	gamma-gliadin	AELIIPQQPQQPFPLQPHQ	omega	QQPQQQYPSGQGSF	alpha-gliadin	NVVESIRQQQHHQPQQEVQ	avenin	QLIPCRDVVL	alpha-gliadin	VPVPQLQPQNPSQQQPQEQVPLVQQ	alpha-gliadin			YYPGQASSQRPGQGQQE	HMW-glutenin
GQGIIQPQQPAQY	gamma-gliadin	AELIIPQQPQQPFPLQPHQP	omega	QQPQQQYPSGQGSFQPS	alpha-gliadin	NVVESIRQQQHHQPQQEVQL	avenin	QLIPCRDVVLQ	alpha-gliadin	VPVPQLQPQNPSQQQPQEQVPLVQQQ	alpha-gliadin			YYPGQASSQRPGQGQQPGQGQQE	HMW-glutenin
GQGTLVQGQGIIQPQQL	gamma-gliadin	AELIIPQQPQQPFPLQPHQPYTQ	omega	QQPQQQYPSGQGSFQPSQQN	alpha-gliadin	RSAWEPQHPSSPEHQPTPQPQ	avenin	QLIPCRDVVLQQ	alpha-gliadin	VPVPQLQPQNPSQQQPQEQVPLVQQQQ	alpha-gliadin			GLEKPSQQQP	LMW-glutenin
GSIQSQQQQPQQL	gamma-gliadin	ELIIPQQPQQPFPLQP	omega	QQPQQQYPSGQGSFQPSQQNPQAQ	alpha-gliadin	RSAWEPQHPSSPEHQPTPQPQEHPVPH	avenin	QLIPCRDVVLQQH	alpha-gliadin	VPVPQLQPQNPSQQQPQEQVPLVQQQQF	alpha-gliadin			IVLQEQQHGQGFNQPQ	LMW-glutenin
GSIQSQQQQPQQLGQ	gamma-gliadin	ELIIPQQPQQPFPLQPHQP	omega	QQPQQQYPSGQGSFQPSQQNPQAQG	alpha-gliadin	RTAWEPHHPSSPEQQPTPQPQ	avenin	QLPQFEEIRNL	alpha-gliadin	VPVPQLQPQNPSQQQPQERVPLV	alpha-gliadin			PQPFSQQQPCSQQQQQPLSQQQQPPFSQQQP	LMW-glutenin
GSLVQGQGIIQPQQPAQL	gamma-gliadin	IIPQQPQQPFPLQPHQP	omega	QQPQQQYPSGQGSFQPSQQNPQAQGF	alpha-gliadin	SFGQPQQQVPVE	avenin	QLPQYEEIRNL	alpha-gliadin	VRVPVPQLQPQNPS	alpha-gliadin			PQQPQPYPQQPFPPQQP	LMW-glutenin
HQPQQTFPQPQQTY	gamma-gliadin	IIPQQPQQPFPLQPHQPYTQQ	omega	QQPQQQYPSGQGSFQPSQQNPQAQGSVQPQ	alpha-gliadin	SFSQPQHQVPIEITR	avenin	QLQNPSQQQPQEQVPL	alpha-gliadin	VRVPVPQLQPQNPSQQEPQEQVP	alpha-gliadin			QPFPQQSQQPVPQQPLQQ	LMW-glutenin
IILPRSDCQVM	gamma-gliadin	IPQQPQQPFPLQPHQPYTQQ	omega	QQPQQQYPSGQGSFQPSQQNPQAQGSVQPQQLPQ	alpha-gliadin	SQPQHQVPIEITR	avenin	QLQPFPQPQLPY	alpha-gliadin	VRVPVPQLQPQNPSQQEPQEQVPLVQQ	alpha-gliadin			QPPFSQQQQQQQPPFSQQQQPPFSQQPP	LMW-glutenin
INEQSRCPAIQ	gamma-gliadin	IPTPLQPQQPFPQQPQQ	omega	QQPQQQYPSSQVSF	alpha-gliadin	AIVMQQQQQQ	gamma-gliadin	QLQPFPQPQLPYPQPQPF	alpha-gliadin	VRVPVPQLQPQNPSQQEPQEQVPLVQQQ	alpha-gliadin			QPYPQQPYPQQPQ	LMW-glutenin
IQPQQPFPQQPQQTY	gamma-gliadin	IPTPLQPQQPFPQQPQQP	omega	QQPQQQYPSSQVSFQPS	alpha-gliadin	AIVMQQQQQQVQ	gamma-gliadin	QLQPFPQPQLSY	alpha-gliadin	VRVPVPQLQPQNPSQQEPQEQVPLVQQQQ	alpha-gliadin			QQPLPPPQSFSQQPPFSQQQQQQPLPQQP	LMW-glutenin
IQPSLQQQL	gamma-gliadin	LIIPQQPQQPFPLQPHQPYTQQ	omega	QQPQQQYPSSQVSFQPSQLNPQAQGSVQPQ	alpha-gliadin	AIVMQQQQQQVQQ	gamma-gliadin	QNPSQQQPQEQVPL	alpha-gliadin	VRVPVPQLQPQNPSQQQP	alpha-gliadin			QQPPFPQQQQSPFSQQQQQQPP	LMW-glutenin
IQPSLQQQLNPC	gamma-gliadin	PFPQQPQQPFPQQPPQPFPQPQQP	omega	QQPQQQYPSSQVSFQPSQLNPQAQGSVQPQQLPQ	alpha-gliadin	AIVMQQQQQQVQQQ	gamma-gliadin	QPFPQPQLPYPQPQPVQPQQPYP	alpha-gliadin	VRVPVPQLQPQNPSQQQPQ	alpha-gliadin			QQPPFSQQQQPILPQQPPFSQQQQQPVLPQQ	LMW-glutenin
IQPSLQQQLNPCKN	gamma-gliadin	PQQPFPLQPQQPFPQQPQQPFPEPQQPIP	omega	QQPSSQVSF	alpha-gliadin	AIVMQQQQQQVQQQVDH	gamma-gliadin	QPQPFLPQLPYPQPQPF	alpha-gliadin	VRVPVPQLQPQNPSQQQPQEQV	alpha-gliadin			QQPPFSQQQQPSFSQQQQQPPFTQQQQPP	LMW-glutenin
IVQQQPQPQQVGQ	gamma-gliadin	PQQPFPQPQHPIPQQPQQSF	omega	QQQAQQQQQQQQQQQQIL	alpha-gliadin	AIVMQQQQQQVQQQVDHGF	gamma-gliadin	QPQPFPQLQLPY	alpha-gliadin	VRVPVPQLQPQNPSQQQPQEQVP	alpha-gliadin			QQPVLPQQPPFSQQQPVLPPQQSPFPQ	LMW-glutenin
IVQQQPQPQQVGQC	gamma-gliadin	PQQPQQPFSQPQQQLPLQPQQPFPQPQQP	omega	QQQAQQQQQQQQQQQQQIL	alpha-gliadin	AIVMQQQQQQVQQQVDHGFVQ	gamma-gliadin	QPQQIPQF	alpha-gliadin	VRVPVPQLQPQNPSQQQPQEQVPL	alpha-gliadin			AELIIPQQPQQPFPLQPHQP	omega
IVQQQPQPQQVGQCVL	gamma-gliadin	PQQQQLSQQQFPRPQQSPEQQQFPQQPP	omega	QQQLIPCMDVVL	alpha-gliadin	AIVMQQQQQQVQQQVDHGFVQSQ	gamma-gliadin	QPSQLNPQAQGSVQPQ	alpha-gliadin	VRVPVPQLQPQNPSQQQPQEQVPLVQQ	alpha-gliadin			PFPQQPQQSFPQQPQQPFP	omega
KCTAIDSIVH	gamma-gliadin	QPFPQPQQPFPWQPQQPFPQPQQP	omega	QQQLIPCMDVVLQQH	alpha-gliadin	AQIPEQYK	gamma-gliadin	QPSQLNPQAQGSVQPQQLPQF	alpha-gliadin	VRVPVPQLQPQNPSQQQPQEQVPLVQQQ	alpha-gliadin			PQQPFPQQPQQSQQSFPQPQ	omega
KTLPTMCN	gamma-gliadin	QPFPQQPQQPFPQPQLPFPLQPQQPFPQ	omega	QQQLIPCMDVVLQQHN	alpha-gliadin	EQPQQPFPWQQPTIQL	gamma-gliadin	QPSQLNPQAQGSVQPQQLPQFAE	alpha-gliadin	VVLQQPNIAHA	alpha-gliadin			PQQPFPQQPQRPFPQQP	omega
KTLPTMCNVY	gamma-gliadin	RQLNPSSQELQ	omega	QQQLIPCRDVILQ	alpha-gliadin	FLQPQQPQQSFPQQQQPL	gamma-gliadin	QPSQLNPQAQGSVQPQQLPQFAEIRN	alpha-gliadin	VVLQQPNIAHAS	alpha-gliadin			QPFPQQPQQPFPQPQLPFPQQPEQIIPQ	omega
LCNVHVPPY	gamma-gliadin	RQLNPSSQELQSP	omega	QQQLIPCRDVLL	alpha-gliadin	GIIQPQQPAQLEAIR	gamma-gliadin	QPSQQNPQAQGF	alpha-gliadin	VVLQQPNIAHASSKVSQQ	alpha-gliadin			QPQQPFPQPQQPIPVQPQQP	omega
LCNVHVPPYCSPF	gamma-gliadin	RQLNPSSQELQSPQ	omega	QQQLIPCRDVVL	alpha-gliadin	GIIQPQQPAQLEVIR	gamma-gliadin	QPSQQNPQAQGSVQPQQLPQFEEIRNL	alpha-gliadin	VVLQQPNIAHASSQVSQQ	alpha-gliadin			QQPFPQQPQQSQQSFPQPQ	omega
LCNVHVPSDCY	gamma-gliadin	RQLNPSSQELQSPQQ	omega	QQQLIPCRDVVLQ	alpha-gliadin	GIIQPQQPAQYE	gamma-gliadin	QPSQRNPQAQGSVQPQQLPQFEE	alpha-gliadin	AIILQQQQQLVQA	avenin
LIQPSLQQ	gamma-gliadin	TPQEQFPQQQQFPQPQQFPQQQIPQQHQIPQQP	omega	QQQLIPCRDVVLQQ	alpha-gliadin	GIIQPQQPAQYEVIR	gamma-gliadin	QQEQQQQLQQQQQQQLQQQQQQQQQQQQP	alpha-gliadin	AIILQQQQQLVQG	avenin
LLQQCKPVSL	gamma-gliadin	TPQQYFPYLPEELFPQY	omega	QQQLIPCRDVVLQQH	alpha-gliadin	GQGIIQPQQPAQ	gamma-gliadin	QQHNIAHASSQVL	alpha-gliadin	AIIQQQSQQQWQEPQQQAQHK	avenin
LLQQCKPVSLV	gamma-gliadin			QQQLIPCRDVVLQQPN	alpha-gliadin	GQGIIQPQQPAQLE	gamma-gliadin	QQHNIAHESSQVL	alpha-gliadin	IIQQQSQQQWQEPQQQAQHK	avenin
LLQQCNHVSL	gamma-gliadin			QQQPSSQVSY	alpha-gliadin	GQGIIQPQQPAQLEA	gamma-gliadin	QQHNIAHGSSQVLQESTY	alpha-gliadin	IMQQQSQQQWQERQQQAQHK	avenin
LLQQCRPV	gamma-gliadin			QQQQLIPCR	alpha-gliadin	GQGIIQPQQPAQLEAIR	gamma-gliadin	QQHSIAHGSSQVL	alpha-gliadin	NVAEAIRQQQP	avenin
LLQQCRPVS	gamma-gliadin			QQQQLIPCRDVIVL	alpha-gliadin	GQGIIQPQQPAQLEVIR	gamma-gliadin	QQILQQQLIPCMDVVL	alpha-gliadin	NVAEAIRQQQPQ	avenin
LLQQCRPVSL	gamma-gliadin			QQQQQEQQIL	alpha-gliadin	GQGIIQPQQPAQY	gamma-gliadin	QQILQQQLIPCMDVVLQ	alpha-gliadin	RQQQGQSFGQPQQQVPV	avenin
LLQQCTLDEKV	gamma-gliadin			QQQQQEQQQQQQQIL	alpha-gliadin	GQGIIQPQQPAQYE	gamma-gliadin	QQLIPCMDVVLQQH	alpha-gliadin	SIRQQQHHQPQQEVQL	avenin
LLQQCTLDEKVP	gamma-gliadin			QQQQQPSSQVSY	alpha-gliadin	GQGIIQPQQPAQYEV	gamma-gliadin	QQLIPCRDVVL	alpha-gliadin	AFPHQPQQQFPQPQQP	gamma-gliadin
LLQQCTLDEKVPL	gamma-gliadin			QQQQQQEQQIL	alpha-gliadin	GQGIIQPQQPAQYEVIR	gamma-gliadin	QQNPQAQGSVQPQQLPQFEEIRNL	alpha-gliadin	AIVMQQQQQQVQ	gamma-gliadin
LQGQGIIQPQQPAQL	gamma-gliadin			QQQQQQPSSQVSF	alpha-gliadin	GQSIIQQQPAQLEVIR	gamma-gliadin	QQPFPSQQPY	alpha-gliadin	AIVMQQQQQQVQQ	gamma-gliadin
LQPQQAFPQQPQQPFPQ	gamma-gliadin			QQQQQQPSSQVSY	alpha-gliadin	IFLPLSQQQQVGQGSLVQGQG	gamma-gliadin	QQPLQQYPL	alpha-gliadin	AIVMQQQQQQVQQQ	gamma-gliadin
LQPQQPFPQQPQQPY	gamma-gliadin			QQQQQQQEQQIL	alpha-gliadin	IIQPQQPAQLE	gamma-gliadin	QQPNIAHASSQVSQQ	alpha-gliadin	AQGLGIIQPQQPAQLE	gamma-gliadin
LQPQQPQQSFPQQQQPL	gamma-gliadin			QQQQQQQEQQILQQ	alpha-gliadin	IIQPQQPAQLEGIR	gamma-gliadin	QQPNIAHASSQVSQQSY	alpha-gliadin	AQGLGIIQPQQPAQLEGIR	gamma-gliadin
LQPRQPFPQQPQQPY	gamma-gliadin			QQQQQQQEQQQQL	alpha-gliadin	IIQPQQPAQYE	gamma-gliadin	QQPNIAHASSQVSQQSYQ	alpha-gliadin	AQGLGIIQPQQPAQLEGIRS	gamma-gliadin
LQPSIQQ	gamma-gliadin			QQQQQQQPSSQVSY	alpha-gliadin	IIQPQQPAQYEVIR	gamma-gliadin	QQPQEQYPSGQGSF	alpha-gliadin	AQIPEQYK	gamma-gliadin
LQQCKPVSL	gamma-gliadin			QQQQQQQQIL	alpha-gliadin	IIQQQPAQLE	gamma-gliadin	QQPQQQYPL	alpha-gliadin	ELERPQQLFPQWQPLPQQPP	gamma-gliadin
LQQCNPVSL	gamma-gliadin			QQQQQQQQPSSQVSY	alpha-gliadin	IIQQQPAQLEVIR	gamma-gliadin	QQPQQQYPLGQGSF	alpha-gliadin	EQPQQPFPWQQPT	gamma-gliadin
LQQCNPVSLVSSL	gamma-gliadin			QQQQQQQQQIIQQIL	alpha-gliadin	IQQQPAQLEVIR	gamma-gliadin	QQPQQQYPSGQGF	alpha-gliadin	ERPQQLFPQWQPLPQQPPF	gamma-gliadin
LQQCRPVSLL	gamma-gliadin			QQQQQQQQQLI	alpha-gliadin	IVHAIVMQQQQ	gamma-gliadin	QQPQQQYPSGQGFF	alpha-gliadin	FLPFPDQLLPQPPHQS	gamma-gliadin
LQQCTLDEKVPL	gamma-gliadin			QQQQQQQQQPSSQVSF	alpha-gliadin	IVQGQSIIQQQPAQL	gamma-gliadin	QQPQQQYPSGQGSF	alpha-gliadin	FLQPQHTFPLQPQ	gamma-gliadin
LQQEPEQPYPQQQPLPQ	gamma-gliadin			QQQQQQQQQPSSQVSY	alpha-gliadin	IVQGQSIIQQQPAQLEV	gamma-gliadin	QQPQQQYPSGQGSFQPS	alpha-gliadin	FLQPQQPQQSFPQQQQPL	gamma-gliadin
LQQQCSPVAMPQR	gamma-gliadin			QQQQQQQQQQEQQILQQIL	alpha-gliadin	LPLSQQQQVGQGSLVQGQ	gamma-gliadin	QQPQQQYPSGQGSFQPSQQN	alpha-gliadin	FNPSGLELERPQ	gamma-gliadin
LQQQLVPQLQQPL	gamma-gliadin			QQQQQQQQQQIIQQIL	alpha-gliadin	LPLSQQQQVGQGSLVQGQG	gamma-gliadin	QQPQQQYPSGQGSFQPSQQNPQAQG	alpha-gliadin	FPQPPQSYPQPPLQPFPQPP	gamma-gliadin
LQQQMNPCKNF	gamma-gliadin			QQQQQQQQQQLL	alpha-gliadin	LQQLGQGMPIQLQQQPGQA	gamma-gliadin	QQPQQQYPSGQGSFQPSQQNPQAQGF	alpha-gliadin	FPQPPQSYPQPPLQPFPQPPQQK	gamma-gliadin
LVQGQGIIQPQQPAQL	gamma-gliadin			QQQQQQQQQQPSSQVSY	alpha-gliadin	LSQQQQVGQGSLVQGQG	gamma-gliadin	QQPQQQYPSGQGSFQPSQQNPQAQGSVQPQ	alpha-gliadin	FPQPQQPQQPFPQPQQAHLPFPQ	gamma-gliadin
LVQGQGIIQPQQPAQY	gamma-gliadin			QQQQQQQQQQQII	alpha-gliadin	LVQGQGIIQPQQPAQL	gamma-gliadin	QQPQQQYPSGQGSFQPSQQNPQAQGSVQPQQLPQ	alpha-gliadin	FPQWQPLPQQPPF	gamma-gliadin
NLQVDPSGQVQW	gamma-gliadin			QQQQQQQQQQQPSSQVSY	alpha-gliadin	LVQGQGIIQPQQPAQLE	gamma-gliadin	QQPQQQYPSGQGSFQPSQQNPQAQGSVQPQQLPQFEEIRNL	alpha-gliadin	FVLPQQQAQFKVVGS	gamma-gliadin
PFPQSQQLQQPFP	gamma-gliadin			QQQQQQQQQQQQIIQQIL	alpha-gliadin	LVQGQGIIQPQQPAQLEV	gamma-gliadin	QQPQQQYPSSQVSF	alpha-gliadin	GIIQPQQPAQLEGIRS	gamma-gliadin
PHISQQNSCQL	gamma-gliadin			QQQQQQQQQQQQIL	alpha-gliadin	LVQGQGIIQPQQPAQLEVLR	gamma-gliadin	QQPQQQYPSSQVSFQPS	alpha-gliadin	GLELERPQQLFPQWQPLPQQPP	gamma-gliadin
PQQPFLQPQQPQQPFPQ	gamma-gliadin			QQQQQQQQQQQQPSSQVSY	alpha-gliadin	LVQGQGIIQPQQPAQY	gamma-gliadin	QQPQQQYPSSQVSFQPSQLNPQAQGSVQPQ	alpha-gliadin	GQGIIQPQQPAQ	gamma-gliadin
PQQPQQPFPQTQQPQ	gamma-gliadin			QQQQQQQQQQQQQII	alpha-gliadin	LVQGQGIIQPQQPAQYE	gamma-gliadin	QQPSSQVSY	alpha-gliadin	GQGIIQPQQPAQL	gamma-gliadin
PQQPQQPYPQQPQQPFPQ	gamma-gliadin			QQQQQQQQQQQQQQLL	alpha-gliadin	LVQGQGIIQPQQPAQYEV	gamma-gliadin	QQQAQQQQQQQQQQQQIL	alpha-gliadin	GQGIIQPQQPAQLE	gamma-gliadin
PQRPQQPFPQ	gamma-gliadin			QQQQQQQQQQQQQQPSSQVSY	alpha-gliadin	LVQGQGIIQPQQPAQYEVIR	gamma-gliadin	QQQAQQQQQQQQQQQQQIL	alpha-gliadin	GQGIIQPQQPAQLEA	gamma-gliadin
PQTQQPQQPFPQ	gamma-gliadin			QQQQQQQQQQQQQQQIL	alpha-gliadin	NIQVDPSGQVQWLQQ	gamma-gliadin	QQQLIPCMD	alpha-gliadin	GQGIIQPQQPAQY	gamma-gliadin
PSGQVQWPQ	gamma-gliadin			QQQQQQQQQQQQQQQQPSSQVSY	alpha-gliadin	NIQVDPSGQVQWLQQQ	gamma-gliadin	QQQLIPCMDVVL	alpha-gliadin	GQGIIQPQQPAQYE	gamma-gliadin
PSGQVQWPQQQLVPQPQQPL	gamma-gliadin			QQQQQQQQQQQQQQQQQLL	alpha-gliadin	PQQPFPQPQQPQLPFPLQPQQPFPQP	gamma-gliadin	QQQLIPCMDVVLQ	alpha-gliadin	HQPQQTFPQPEQTYPHQP	gamma-gliadin
PSSQVQWPQ	gamma-gliadin			QQQQQQQQQQQQQQQQQQQIL	alpha-gliadin	PQQPFPQPQQPQLPFPLQPQQPFPQPQQ	gamma-gliadin	QQQLIPCMDVVLQEHNI	alpha-gliadin	IFLPLSQQQQVGQGSLVQGQ	gamma-gliadin
QAFPQPQQTF	gamma-gliadin			QQQRQQPSSQVSF	alpha-gliadin	PQQPFPQPQQPQLPFPLQPQQPFPQPQQP	gamma-gliadin	QQQLIPCMDVVLQQ	alpha-gliadin	IFMQQGQRQG	gamma-gliadin
QHPQQQFPQPQQPQ	gamma-gliadin			QQRQQPSSQVSF	alpha-gliadin	PQQPFPQPQQPQQQLPQSQQPQQP	gamma-gliadin	QQQLIPCMDVVLQQH	alpha-gliadin	IIQPQQPAQLEG	gamma-gliadin
QIFPQPQQTFPHQPQ	gamma-gliadin			QQYPLGQGSF	alpha-gliadin	PQQPFPQSQQPQQPFPQPQQP	gamma-gliadin	QQQLIPCMDVVLQQHN	alpha-gliadin	IIQPQQPAQLEGIR	gamma-gliadin
QIQCAALH	gamma-gliadin			QQYPSGQGSF	alpha-gliadin	PQQPFSQPQQPQLPLPQQPQQPFPQ	gamma-gliadin	QQQLIPCMDVVLQQHNL	alpha-gliadin	IIQPQQPAQLEGIRS	gamma-gliadin
QLANINEQSRCPAIQ	gamma-gliadin			QQYPSGQGSFQPSQQNPQAQGF	alpha-gliadin	PQQPQLPFPLQPQQPFPQPQQ	gamma-gliadin	QQQLIPCRDVILQ	alpha-gliadin	ILLPLSQQQQLGQGTL	gamma-gliadin
QLAQGLGIIQPQQPAQL	gamma-gliadin			QSSQQNPQAQGSVQPQQLPQ	alpha-gliadin	PQQTFPHQPQQPFPQSQQPQQPFPQPQ	gamma-gliadin	QQQLIPCRDVIVL	alpha-gliadin	ILLPLSQQQQLGQGTLVQGQ	gamma-gliadin
QLAQIPEQY	gamma-gliadin			QSSQQNPQAQGSVQPQQLPQFQE	alpha-gliadin	PSGQVPWPQQQPFPQPHQ	gamma-gliadin	QQQLIPCRDVLL	alpha-gliadin	ILLPLSQQQQLGQGTLVQGQGIIQPQQ	gamma-gliadin
QLAQIPQQL	gamma-gliadin			QSSQQNPQAQGSVQPQQLPQFQEIRNL	alpha-gliadin	PSGQVPWPQQQPFPQPHQP	gamma-gliadin	QQQLIPCRDVVL	alpha-gliadin	ILLPLYQQQQVGQGTLVQGQ	gamma-gliadin
QLFPQSQQPQQQF	gamma-gliadin			QTIPTMCNVY	alpha-gliadin	PSGQVQWPQQQPFRQP	gamma-gliadin	QQQLIPCRDVVLQ	alpha-gliadin	ILVPLSQEQQVGQGTFVQGQGIIQPQQPAQL	gamma-gliadin
QLVQGQGIIQPQQPAQL	gamma-gliadin			QTLPAMCN	alpha-gliadin	PSGQVQWPQQQPFRQPQQP	gamma-gliadin	QQQLIPCRDVVLQQH	alpha-gliadin	ILVPLSQQQQVGQGTLIQGQGIIQPQQPAQL	gamma-gliadin
QLVQGQGIIQPQQPAQY	gamma-gliadin			RPQQPYPQPQPQ	alpha-gliadin	PSGQVQWPQQQPFRQPQQPFYQ	gamma-gliadin	QQQLIPCRDVVLQQPN	alpha-gliadin	ILVPLSQQQQVGQGTLVQGQ	gamma-gliadin
QQCTLDEKVPL	gamma-gliadin			RPQQPYPQPQPQY	alpha-gliadin	PSGQVQWPQQQQPFPQPQQP	gamma-gliadin	QQQLTPCMDVVLQQH	alpha-gliadin	IVHAIVMQQQ	gamma-gliadin
QQFPQPQQPQQQF	gamma-gliadin			RPQQPYPQSQPQ	alpha-gliadin	PSSQVQWPQQQPVPQPHQP	gamma-gliadin	QQQQEQQQQQQIL	alpha-gliadin	IVMQQQQQQVQQQV	gamma-gliadin
QQFPQPQQPQQSFPQ	gamma-gliadin			RPQQPYPQSQPQY	alpha-gliadin	PSSQVQWPQQQPVPQPHQPF	gamma-gliadin	QQQQLIPCRDVIVL	alpha-gliadin	IVMQQQQQQVQQQVDH	gamma-gliadin
QQFPQPQQPQQSFPQQQQPAIQ	gamma-gliadin			RPQQSYPQPQPQY	alpha-gliadin	PSSQVQWPQQQPVPQPHQPFS	gamma-gliadin	QQQQLIPCRDVVLQ	alpha-gliadin	LAQGLGIIQPQQPAQLE	gamma-gliadin
QQFPQSQQPQQPFPQPQQQF	gamma-gliadin			SFPPQQPYPQQQPQ	alpha-gliadin	QPFPQPQQPQLPFPLQPQQPFPQP	gamma-gliadin	QQQQQEQQIL	alpha-gliadin	LAQGLGIIQPQQPAQLEGIR	gamma-gliadin
QQLAQIPQQL	gamma-gliadin			SFQPSQQNPQAQGF	alpha-gliadin	QPFPQQPQQSFPQPQQPHLPFPQQPQQPFP	gamma-gliadin	QQQQQEQQQQQQQIL	alpha-gliadin	LERPQQLFPQWQPLPQQPP	gamma-gliadin
QQLNPCKNIL	gamma-gliadin			SIAHGSSQVL	alpha-gliadin	QPFPQQPQQTFPQPQQTSPYQPQQTFP	gamma-gliadin	QQQQQPSSQVSY	alpha-gliadin	LFPQWQPLPQQPP	gamma-gliadin
QQLPQPQQPQQSFPQ	gamma-gliadin			SIAHGSSQVLQQSTY	alpha-gliadin	QPFPQSKQPQQPFPQPQ	gamma-gliadin	QQQQQQEQQIL	alpha-gliadin	LPLSQQQQLGQGTL	gamma-gliadin
QQLVPQPQQPL	gamma-gliadin			SQPQEPISQQQQQQQQQQQIL	alpha-gliadin	QPQLPFPQQQQQAFPLPQQP	gamma-gliadin	QQQQQQEQQILQQIL	alpha-gliadin	LPLSQQQQLGQGTLVQGQ	gamma-gliadin
QQLVQQQLPVVQPSIL	gamma-gliadin			SQPQHPISQQQQQQQQQQQQEQQIL	alpha-gliadin	QPQQPFPQPQQAHLPFPQQ	gamma-gliadin	QQQQQQLLQQIL	alpha-gliadin	LPLSQQQQVGQGSLVQGQ	gamma-gliadin
QQPFPQQPQLPHQH	gamma-gliadin			SQPQQPISQQQQQQQQQQEQQILQQ	alpha-gliadin	QPQQPFPQQPQQPYPQQPQQP	gamma-gliadin	QQQQQQPSSQVSY	alpha-gliadin	LPLSQQQQVGQGSLVQGQGIIQPQQPAQL	gamma-gliadin
QQPLPQQQPFPQQPQLPH	gamma-gliadin			SQPQQPISQQQQQQQQQQQIL	alpha-gliadin	QPQQPFPQTQQPQQPFPQFQQPQQP	gamma-gliadin	QQQQQQQEQQIL	alpha-gliadin	LPQQQAQFKVVGS	gamma-gliadin
QQPQFPQQKPF	gamma-gliadin			SQPQQPISQQQQQQQQQQQQQIL	alpha-gliadin	QQPQQPSPQSQQPQLPFPQQPQQ	gamma-gliadin	QQQQQQQEQQILQQIL	alpha-gliadin	LQQLGQGMPIQLQQQPGQA	gamma-gliadin
QQPQLPFPQQPQQPFPQ	gamma-gliadin			SQPQQPISQQQQQQQQQQQQQQQEQQILQQIL	alpha-gliadin	QQPQQQFSQSQQPQQP	gamma-gliadin	QQQQQQQEQQQQL	alpha-gliadin	LVLPQQPPFSQQQQPVLPPQQSPFP	gamma-gliadin
QQPQQSFPQQQQPLIQLPLQ	gamma-gliadin			SQVLQQSSY	alpha-gliadin	QQQQQQRQQQQGIQ	gamma-gliadin	QQQQQQQIIQQIL	alpha-gliadin	LVQGQGIIQPQQPAQ	gamma-gliadin
QQPSLIQQSL	gamma-gliadin			SQVLQQSTY	alpha-gliadin	SIIMQQEQQQQQQQQQQQQQ	gamma-gliadin	QQQQQQQPSSQVSY	alpha-gliadin	LVQGQGIIQPQQPAQL	gamma-gliadin
QQPVPQPHQPF	gamma-gliadin			SSQQNPQAQGSVQPQQLPQFQEIRNL	alpha-gliadin	SIIMQQEQQQQQQQQQQQQQQQGIQ	gamma-gliadin	QQQQQQQQEQQIL	alpha-gliadin	LVQGQGIIQPQQPAQLE	gamma-gliadin
QQQCCQELAQIPQQL	gamma-gliadin			TIPTMCNVY	alpha-gliadin	SIIMQQEQRQG	gamma-gliadin	QQQQQQQQPSSQVSY	alpha-gliadin	LVQGQGIIQPQQPAQY	gamma-gliadin
QQQLNPCKNF	gamma-gliadin			TLPAMCNVY	alpha-gliadin	SIIMQQEQRQGVQ	gamma-gliadin	QQQQQQQQQEQQIL	alpha-gliadin	LVQGQGIIQPQQPAQYE	gamma-gliadin
QQQPGQAF	gamma-gliadin			TLPAVCNVY	alpha-gliadin	SIIMQQQQQQGLQ	gamma-gliadin	QQQQQQQQQEQQILQQIL	alpha-gliadin	LVQGQGIIQPQQPARL	gamma-gliadin
QQQQQQVQQQVDHGF	gamma-gliadin			TQHLQPQQPISQQ	alpha-gliadin	SIIMQQQQQQQQQQGMH	gamma-gliadin	QQQQQQQQQIIQQIL	alpha-gliadin	NIQVDPSGQVQWPQQQPFPQQAQQTFPQP	gamma-gliadin
QQQQQQVQQQVDHGFVQSQL	gamma-gliadin			VPQLQPQNPSQQQPQEQVPL	alpha-gliadin	SIIMQQQQQQQQQQGMHI	gamma-gliadin	QQQQQQQQQLI	alpha-gliadin	PLSQQQQLGQGTLVQGQ	gamma-gliadin
QQQQVGQGTL	gamma-gliadin			VPVPQLQPQNPSQQQPQ	alpha-gliadin	SIIQQQPAQLEVIR	gamma-gliadin	QQQQQQQQQPSSQVSY	alpha-gliadin	PLSQQQQVGQGSLVQGQ	gamma-gliadin
QQQQVGQGTLVQGQGIIQPQQPAQL	gamma-gliadin			VPVPQLQPQNPSQQQPQEQVPL	alpha-gliadin	SIVMQQEQQQGIQ	gamma-gliadin	QQQQQQQQQQEQQIL	alpha-gliadin	PLYQQQQVGQGTLVQGQ	gamma-gliadin
QQVDHGFVQSQL	gamma-gliadin			VPVPQLQPQNPSQQQPQEQVPLVQ	alpha-gliadin	SIVMQQEQQQGIQI	gamma-gliadin	QQQQQQQQQQIIQQIL	alpha-gliadin	PQPQQPQQPLLQPQQPFPQQP	gamma-gliadin
QQVNPCKNF	gamma-gliadin			VQPQHLPQLEEISNL	alpha-gliadin	SIVMQQEQQQGIQILRP	gamma-gliadin	QQQQQQQQQQLL	alpha-gliadin	PQQPFLQPQQPFPQHPQQP	gamma-gliadin
QQVPQPQQPQQPF	gamma-gliadin			VQPQQIPQFEEIRNL	alpha-gliadin	SIVMQQEQQQGIQILRPL	gamma-gliadin	QQQQQQQQQQPSSQVSY	alpha-gliadin	PQQPFPQPQQAHLPF	gamma-gliadin
QSFPQQQPSLIQQSL	gamma-gliadin			VQPQQLPQFE	alpha-gliadin	SQQQQVGQGSLVQGQ	gamma-gliadin	QQQQQQQQQQQEQQIL	alpha-gliadin	PQQPFPQPQQPQLPFPLQPQQPFPQPQQP	gamma-gliadin
QSFPQQQQPAIQSF	gamma-gliadin			VQPQQLPQFQ	alpha-gliadin	SVAHSIIMQQQQQQGIQ	gamma-gliadin	QQQQQQQQQQQEQQILQQIL	alpha-gliadin	PQQPFPQPQQPQQQLPQSQQPQQP	gamma-gliadin
QSFPQQQQPL	gamma-gliadin			VQQQQFPGQQQ	alpha-gliadin	SVAHSIIMQQQQQQGIQI	gamma-gliadin	QQQQQQQQQQQII	alpha-gliadin	PQQPFPQPQRAQLPFPQQPQQPFPQPQQ	gamma-gliadin
QSFPQQQRPF	gamma-gliadin			VRVPVPQLQPQNPSQQQPQEQVPL	alpha-gliadin	SVVHSIIMQQEQRQGVQ	gamma-gliadin	QQQQQQQQQQQPSSQVSY	alpha-gliadin	PQQPFPQQSQQSFPQPSQPQQPFPQ	gamma-gliadin
QTFPHQPQQQFPQPQQPQQQF	gamma-gliadin			VTVPVPQLQPQNPSQQQPQ	alpha-gliadin	SVVHSIIMQQQQQQ	gamma-gliadin	QQQQQQQQQQQQEQQILQQIL	alpha-gliadin	PQQPFPQSQHPQQPFPQPQ	gamma-gliadin
QTFPQPQQTY	gamma-gliadin			VYIPPYCSTT	alpha-gliadin	SVVHSIIMQQQQQQQQQQGMH	gamma-gliadin	QQQQQQQQQQQQIIQQIL	alpha-gliadin	PQQPFPQTQQPQRPFPQSQQPQQPFPQP	gamma-gliadin
QTLPSMCNVY	gamma-gliadin			VYIPPYCSTTL	alpha-gliadin	SVVHSIIMQQQQQQQQQQGMHI	gamma-gliadin	QQQQQQQQQQQQIL	alpha-gliadin	PQQPQLPFPLQPQQPFPQ	gamma-gliadin
QVQQQVDHGF	gamma-gliadin			VYIPPYCTIAPVG	alpha-gliadin	SVVHSIVMQQ	gamma-gliadin	QQQQQQQQQQQQILQQISQQQL	alpha-gliadin	PQQQFLQPQQPQRSFPQQQQP	gamma-gliadin
QVQWPQQQPFPQPQQPF	gamma-gliadin			VYLPPYCST	alpha-gliadin	SVVHSIVMQQE	gamma-gliadin	QQQQQQQQQQQQPSSQVSY	alpha-gliadin	PQQQFPQTPQPQQQFLQPQQP	gamma-gliadin
RTLPTMCN	gamma-gliadin			VYLPPYCT	alpha-gliadin	SVVHSIVMQQEQQQ	gamma-gliadin	QQQQQQQQQQQQQII	alpha-gliadin	PQQQSPQPQQPQQSFPQQ	gamma-gliadin
SIIMQQEQ	gamma-gliadin			XGQQQPFPPQQPYPQPQPFPSQQPY	alpha-gliadin	SVVHSIVMQQEQQQG	gamma-gliadin	QQQQQQQQQQQQQLLQQIL	alpha-gliadin	PSGQVQWPQQQ	gamma-gliadin
SIIMQQEQQEQ	gamma-gliadin			YLQPQQPISQ	alpha-gliadin	SVVHSIVMQQEQQQGIQ	gamma-gliadin	QQQQQQQQQQQQQQLL	alpha-gliadin	PSGQVQWPQQQLVPQPQQ	gamma-gliadin
SIIMQQEQQEQL	gamma-gliadin			YLQPQQPISQQ	alpha-gliadin	SVVHSIVMQQEQQQGIQI	gamma-gliadin	QQQQQQQQQQQQQQPSSQVSY	alpha-gliadin	PSGQVQWPQQQPFLQPHQP	gamma-gliadin
SIIMQQEQQEQLQ	gamma-gliadin			YLQPQQPISQQQ	alpha-gliadin	VDPSGQVQWPQQQPFRQPQQP	gamma-gliadin	QQQQQQQQQQQQQQQEQQIL	alpha-gliadin	PSGQVQWPQQQPFPQPQP	gamma-gliadin
SIIMQQEQQEQLQG	gamma-gliadin			YLQPQQPISQQQAQ	alpha-gliadin	VQGQGIIQPQQPAQ	gamma-gliadin	QQQQQQQQQQQQQQQEQQILQQIL	alpha-gliadin	PSGQVQWPQQQPFPQPQPFSQQPQQ	gamma-gliadin
SIIMQQEQQEQRQGVQ	gamma-gliadin			YLQPQQPISQQQAQQ	alpha-gliadin	VQGQGIIQPQQPAQL	gamma-gliadin	QQQQQQQQQQQQQQQIL	alpha-gliadin	PSGQVQWPQQQPFPQPQQP	gamma-gliadin
SIIMQQEQQGIQ	gamma-gliadin			YLQPQQPISQQQAQQQ	alpha-gliadin	VQGQGIIQPQQPAQLE	gamma-gliadin	QQQQQQQQQQQQQQQQIL	alpha-gliadin	PSGQVQWPQQQPFPQPQQPF	gamma-gliadin
SIIMQQEQQQGLQ	gamma-gliadin			YLQPQQPISQQQAQQQQ	alpha-gliadin	VQGQGIIQPQQPAQLEV	gamma-gliadin	QQQQQQQQQQQQQQQQQQLL	alpha-gliadin	PSGQVQWPQQQPFRQPQQP	gamma-gliadin
SIIMQQEQQQQQ	gamma-gliadin			YLQPQQPISQQQAQQQQQ	alpha-gliadin	VQGQGIIQPQQPAQLEVIR	gamma-gliadin	QQQQQQQQQQQQQQQQQQQIL	alpha-gliadin	PSGQVQWPQQQPFRQPQQPF	gamma-gliadin
SIIMQQEQQQQQQQQQGIQ	gamma-gliadin			YLQPQQPISQQQAQQQQQQ	alpha-gliadin	VQGQGIIQPQQPAQY	gamma-gliadin	QQQRQQPSSQVSF	alpha-gliadin	PSSQVQWPQQQPFRQPQQ	gamma-gliadin
SIIMQQEQRQ	gamma-gliadin			YLQPQQPISQQQAQQQQQQQQ	alpha-gliadin	VQGQGIIQPQQPAQYEV	gamma-gliadin	QQRQQPSSQVSF	alpha-gliadin	PSSQVQWPQQQPVPQPHQ	gamma-gliadin
SIIMQQEQRQG	gamma-gliadin			YLQPQQPISQQQAQQQQQQQQQ	alpha-gliadin	VQGQGIIQPQQPAQYEVIR	gamma-gliadin	QQYPLGQGSF	alpha-gliadin	PSSQVQWPQQQPVPQPHQP	gamma-gliadin
SIIMQQEQRQGV	gamma-gliadin			YLQPQQPISQQQAQQQQQQQQQQQQ	alpha-gliadin	VQGQSIIQQQPAQLE	gamma-gliadin	QQYPSGQGSF	alpha-gliadin	QLFPQWQPLPQQPP	gamma-gliadin
SIIMQQEQRQGVQ	gamma-gliadin			YLQPQQPISQQQAQQQQQQQQQQQQQ	alpha-gliadin	VQGQSIIQQQPAQLEV	gamma-gliadin	QQYPSGQGSFQPSQQNPQAQGF	alpha-gliadin	QPFPQPQQAHLPFPQQ	gamma-gliadin
SIIMQQEQRQGVQI	gamma-gliadin			YLQPQQPISQQQAQQQQQQQQQQQQQQQ	alpha-gliadin	VQGQSIIQQQPAQLEVIR	gamma-gliadin	QQYPSSQVSF	alpha-gliadin	QPFPQPQQAHLPFPQQP	gamma-gliadin
SIIMQQQQQQQ	gamma-gliadin			YSQPQEPISQQQQQQQQQQQIL	alpha-gliadin	YPEQPQQPFPWQQPTIQ	gamma-gliadin	QSSQQNPQAQGSVQPQQLPQ	alpha-gliadin	QPFPQTQQPQQPSPQTQQ	gamma-gliadin
SIIMQQQQQQQQQ	gamma-gliadin			YSQPQHPISQQQQQQQQQQQQEQQIL	alpha-gliadin	YPEQPQQPFPWQQPTIQL	gamma-gliadin	QSSQQNPQAQGSVQPQQLPQF	alpha-gliadin	QPQQPFCQQPQQPYPQQPQQP	gamma-gliadin
SIIMQQQQQQQQQQ	gamma-gliadin			YSQPQQPISQQ	alpha-gliadin	YQQQQVGQGTLVQGQG	gamma-gliadin	QSSQQNPQAQGSVQPQQLPQFQE	alpha-gliadin	QPQQPFPQQPQQPCPQQPQQPFPQTQQPQQP	gamma-gliadin
SIIMQQQQQQQQQQGMH	gamma-gliadin			YSQPQQPISQQQ	alpha-gliadin	ASLQQPGQGQQGHYP	HMW-glutenin	QSSQQNPQAQGSVQPQQLPQFQEIRN	alpha-gliadin	QPQQPFPQQPQQPSPQTQQPQQP	gamma-gliadin
SIIVQQQQQQ	gamma-gliadin			YSQPQQPISQQQQ	alpha-gliadin	AYQQVVDQQLR	HMW-glutenin	QSSQQNPQAQGSVQPQQLPQFQEIRNL	alpha-gliadin	QQPFPQPHQPFSQQP	gamma-gliadin
SIIVQQQQQQQ	gamma-gliadin			YSQPQQPISQQQQQ	alpha-gliadin	ELYYGSPYHVS	HMW-glutenin	QTLPAMCN	alpha-gliadin	QQPFPQPHQPFSQQPQ	gamma-gliadin
SIIVQQQQQQQQ	gamma-gliadin			YSQPQQPISQQQQQQ	alpha-gliadin	ELYYGSPYHVSVEQPSASLK	HMW-glutenin	RPQQLYPQPQPQY	alpha-gliadin	QQPQQTFPQPQQAFPHQ	gamma-gliadin
SIIVQQQQQQQQQQ	gamma-gliadin			YSQPQQPISQQQQQQQ	alpha-gliadin	EQQPVVPSKAGSFYPS	HMW-glutenin	RPQQPYPQPQPQ	alpha-gliadin	QQPQQTFPQPQQAFPHQP	gamma-gliadin
SIIVQQQQQQQQQQQ	gamma-gliadin			YSQPQQPISQQQQQQQQ	alpha-gliadin	HQGQQTTVSPHQGQQTTVSPHQG	HMW-glutenin	RPQQPYPQPQPQY	alpha-gliadin	QQQQQQPFPQQPQQP	gamma-gliadin
SIIVQQQQQQQQQQQQ	gamma-gliadin			YSQPQQPISQQQQQQQQQ	alpha-gliadin	HVSVEHQAASLK	HMW-glutenin	RPQQPYPQSQPQY	alpha-gliadin	SGQVQWPQQQPFPQPQPFSQQPQQA	gamma-gliadin
SIIVQQQQQQQQQQQQQ	gamma-gliadin			YSQPQQPISQQQQQQQQQIL	alpha-gliadin	HVSVEHQAASLKVA	HMW-glutenin	RPQQSYPQPQPQY	alpha-gliadin	SGQVQWPQQQPFPQPQQPLYQQPQQ	gamma-gliadin
SIIWPQSDCQVM	gamma-gliadin			YSQPQQPISQQQQQQQQQQ	alpha-gliadin	HVSVEHQAASLKVAK	HMW-glutenin	SFPPQQPYPQQQPQ	alpha-gliadin	SIIMQQEQRQGVQ	gamma-gliadin
SIVMQQEQQQGIQ	gamma-gliadin			YSQPQQPISQQQQQQQQQQQ	alpha-gliadin	IATSPQQPGQGQQLGQGQQPGHGQQ	HMW-glutenin	SFQPSQLNPQAQ	alpha-gliadin	SIIMQQQQQQQQQQGMH	gamma-gliadin
SLQQQLNPCKNF	gamma-gliadin			AIILQQQQQL	avenin	IVVPPKGGSFYPGETTPPQQLQQR	HMW-glutenin	SFQPSQLNPQAQGSVQPQ	alpha-gliadin	SIIMQQQQQQQQQQGMHI	gamma-gliadin
SLQQQMNPC	gamma-gliadin			AQISEQARCQ	avenin	LQQPTQGQQRQQPGQGQQL	HMW-glutenin	SIAHGSSQVL	alpha-gliadin	SIIVQQQQQQQQQQQQQQGMH	gamma-gliadin
SLQQQMNPCKNF	gamma-gliadin			AQISEQARCQAVC	avenin	LTSPLQLGQGQQGYYPT	HMW-glutenin	SQPQEPISQQQQQQQQQQQIL	alpha-gliadin	SIVMQQEQQQGIQ	gamma-gliadin
SLVQGQGIIQPQQPAQL	gamma-gliadin			AVCGVAQVIM	avenin	LTSPQQSGQGQQPGQLQ	HMW-glutenin	SQPQHPISQQQQQQQQQQQQEQQIL	alpha-gliadin	SQQQQLGQGTLVQGQ	gamma-gliadin
SQQPQQAFPQPQ	gamma-gliadin			CTTTPCSTITP	avenin	NPYHVNTEQQTASPKVA	HMW-glutenin	SQPQQPISEQQQQQQQQQQQ	alpha-gliadin	SQQQQVGQGILVQGQGIIQPQQPAQL	gamma-gliadin
SQQPQQIFPQPQ	gamma-gliadin			CTTTPCSTITPA	avenin	PGQASSQRPGQGQQEYY	HMW-glutenin	SQPQQPISQQ	alpha-gliadin	SQQQQVGQGSLVQGQGIIQPQQPAQL	gamma-gliadin
SQQPQQIFPQPQQTF	gamma-gliadin			CTTTPCSTITPAIY	avenin	PQQPRQGQLPGQWQQPGQVQQ	HMW-glutenin	SQPQQPISQQQQQQ	alpha-gliadin	SVVHSIIMQQQQQQQQQQGMH	gamma-gliadin
SQQPQQPFPQPEQQFPQPQQPQ	gamma-gliadin			CTTTPCSTITPT	avenin	PTSPQQPGQGQQPGQLQ	HMW-glutenin	SQPQQPISQQQQQQQQQQEQQILQQ	alpha-gliadin	SVVHSIVMQQEQQQ	gamma-gliadin
SQQPQQPFPQPQQPQQSFPQQQQPL	gamma-gliadin			CTTTPCSTITPTIY	avenin	PVAVSQVVRQ	HMW-glutenin	SQPQQPISQQQQQQQQQQQQ	alpha-gliadin	TQQPQQPFPQQPQQP	gamma-gliadin
SQQPQQPFPQPQQQF	gamma-gliadin			CTTTPCSTITQTPY	avenin	QGQQLGQGQQGYYPTSQQAGQGQQPGQGQQG	HMW-glutenin	SQPQQPISQQQQQQQQQQQQQIL	alpha-gliadin	TTMQFNPSGLELERPQ	gamma-gliadin
SQQPQQTFPQPQQTF	gamma-gliadin			DQMKPCVAF	avenin	RVVDQQLVGQLPWSTG	HMW-glutenin	SQPQQPISQQQQQQQQQQQQQILQQ	alpha-gliadin	VQGQGIIQPQQPAQ	gamma-gliadin
SQQQQLGQGTL	gamma-gliadin			EQMKPCVAF	avenin	RVVDQQLVGQLPWSTGL	HMW-glutenin	SQPQQPISQQQQQQQQQQQQQQ	alpha-gliadin	VQGQGIIQPQQPAQL	gamma-gliadin
SQQQQVGQGIL	gamma-gliadin			GQCQQQPQPQPQMNTCAAF	avenin	SEQQPGQGQQRHYPASLQQPGQGQQGHYT	HMW-glutenin	SQPQQPISQQQQQQQQQQQQQQQ	alpha-gliadin	VQGQGIIQPQQPAQLE	gamma-gliadin
SQQQQVGQGILVQ	gamma-gliadin			GQCQQQPQPQPQMNTCSAF	avenin	SLHQSGQGQQGYYPS	HMW-glutenin	SQPQQPISQQQQQQQQQQQQQQQI	alpha-gliadin	VQGQGIIQPQQPAQYE	gamma-gliadin
SQQQQVGQGSL	gamma-gliadin			GQCQQQPQPQPQPQPQMNTCAAF	avenin	SLQQPGQEQPRYYPTSPWQPGQLQQPTQGQQR	HMW-glutenin	SQPQQPISQQQQQQQQQQQQQQQIL	alpha-gliadin	VQWPQQQPFPQPQQP	gamma-gliadin
SQQQQVGQGSLVQ	gamma-gliadin			GQCQQQPQQQVNTCSALL	avenin	SLQQPGQGLQGHYPA	HMW-glutenin	SQPQQPISQQQQQQQQQQQQQQQQEQQILQQIL	alpha-gliadin	YPEQPQQPFPWQQPT	gamma-gliadin
SQQQQVGQGSLVQGQ	gamma-gliadin			GQPQQQQGQSF	avenin	SLQQPGQGQQGHY	HMW-glutenin	SQPQQPISQQQQQQQQQQQQQQQQQQ	alpha-gliadin	AEQQAASPMVAK	HMW-glutenin
SQQQQVGQGSLVQGQG	gamma-gliadin			GQPQQQVPIEIR	avenin	SLQQPGQGQQGHYP	HMW-glutenin	SQQNPQAQGSVQPQQLPQFEEIRNL	alpha-gliadin	AISPQQSGQGQQGYQPS	HMW-glutenin
SQQQQVGQGSLVQGQGIIQPQQPAQL	gamma-gliadin			GQPQQQVQSF	avenin	SLQQPGQGQQGHYPA	HMW-glutenin	SQQQPQEQVPL	alpha-gliadin	AISPQQSGQGQQGYQPSGASSQ	HMW-glutenin
SQQQQVGQGTL	gamma-gliadin			GQQQQQQLQEQLTPCTTF	avenin	SLQQPGQGQQIGKGKQGY	HMW-glutenin	SSQQNPQAQGSVQPQQLPQFQEIRNL	alpha-gliadin	AQGQQSAQEQQPGQA	HMW-glutenin
SQQQQVGQGTLLQGQGIIQPQQPAQL	gamma-gliadin			GQSQQQQQPGQRQLL	avenin	SLQQPGQGQQIGKGKQGYYPT	HMW-glutenin	SSVQHQQLPQFEEIRNL	alpha-gliadin	ASLQQPGQGQQGHYP	HMW-glutenin
SSVVAGIGGQ	gamma-gliadin			IPVQCPAPTTY	avenin	SLQQPGQGQQIGKGKQGYYPTS	HMW-glutenin	TPCMDVVLQQH	alpha-gliadin	ASPQQPGQGQQPGKW	HMW-glutenin
SVVHSIIVQQQQQQQQQ	gamma-gliadin			IYIPVQCPATT	avenin	SLQQTGQGQQSGQGQQGYY	HMW-glutenin	VPQLQPQNPSQQQPQEQVPL	alpha-gliadin	ELYYGSPYHV	HMW-glutenin
TQQPQQLFPQSQQPQQQF	gamma-gliadin			IYVPVQCQQQQ	avenin	SLWQPGQGQQGYASPYHVS	HMW-glutenin	VPVPQLQPQNPSLQQPQEQVPL	alpha-gliadin	ELYYGSPYHVS	HMW-glutenin
TQQPQQPFPQ	gamma-gliadin			IYVPVQCQQQQQL	avenin	SPHQGQQTTVSPHQGQQTTVSPHQG	HMW-glutenin	VPVPQLQPQNPSQQQPQ	alpha-gliadin	EQQPGQAQQSGQWQ	HMW-glutenin
TQQPQQPFPQFQQPHQPF	gamma-gliadin			LDTTCSQGY	avenin	SPRQGSYYPGQASPQQPGQGQQPGK	HMW-glutenin	VPVPQLQPQNPSQQQPQEQVPL	alpha-gliadin	EVPSKGGSFYPGGTAPPLQQGGW	HMW-glutenin
TQQPQQPFPQQPQQPFPQ	gamma-gliadin			LQQCSPTPY	avenin	SPYHVSAEHQAASLK	HMW-glutenin	VQPQHLPQLEEISNL	alpha-gliadin	FPQQPEQIIPQQPQQP	HMW-glutenin
TQQPYPQQQPL	gamma-gliadin			LQQCSPVADMS	avenin	SPYHVSAEQQAASPMVAK	HMW-glutenin	VQPQQIPQFEEIRNL	alpha-gliadin	GAYTQQKPGQGYNPGGTSPLHQQ	HMW-glutenin
VFVPPECSTT	gamma-gliadin			LQQCSPVADMSF	avenin	SQQQPGQGQHGLYPTSQQQPGQGQQGHYP	HMW-glutenin	VQPQQLPQF	alpha-gliadin	GGSFYPGGTAPPLQQGGW	HMW-glutenin
VGQGSLVQGQGIIQPQQPAQL	gamma-gliadin			LQQCSQTPHVQT	avenin	SSLQPEQGQQGYYPT	HMW-glutenin	VQQQQFPGQQQ	alpha-gliadin	GYYPTSTQQSGQGQQGYYPT	HMW-glutenin
VLKTLPTMCN	gamma-gliadin			LQQQCRPL	avenin	STFPQQPGQGQQPGQRQP	HMW-glutenin	VYIPPHCSTTI	alpha-gliadin	IVVPPKGGSFYPGETTPPQQLQQRI	HMW-glutenin
VLPQQQAQF	gamma-gliadin			LQTQVEQL	avenin	SVAVSQVARQ	HMW-glutenin	VYIPPYCSTT	alpha-gliadin	LLQPGQGQQGPYQSA	HMW-glutenin
VLQTIPTMCN	gamma-gliadin			LQTQVEQLSSCQIVQY	avenin	SVAVSQVARQYEQ	HMW-glutenin	VYIPPYCTI	alpha-gliadin	LQQPTQGQQRQQPGQGQQL	HMW-glutenin
VLQTIPTMCNVY	gamma-gliadin			NVAEAIRQQQPQ	avenin	SVAVSQVARQYEQTVVPPKGGSFYPGETTP	HMW-glutenin	VYLPPYCT	alpha-gliadin	LTSPLQLGQGQQGYY	HMW-glutenin
VLQTLPSMCN	gamma-gliadin			NVAEAIRQQQPQQ	avenin	TSPQQLGQGQQPRQW	HMW-glutenin	XGQQQPFPPQQPYPQPQPFPSQQPY	alpha-gliadin	LTSPLQLGQGQQGYYPT	HMW-glutenin
VLRTLPNMCNVY	gamma-gliadin			NVAEAIRQQQPQQQ	avenin	TSPQQPGQGQQLGQGQQPGHGQ	HMW-glutenin	YLQLQPFPQPQLPY	alpha-gliadin	LTSPQQLGQGQQPRQ	HMW-glutenin
VLVQGQGVAQPQQL	gamma-gliadin			NVPMATTCVGGTC	avenin	TSPQQPGQGQQLGQGQQPGHGQQ	HMW-glutenin	YLQPQQPISQQ	alpha-gliadin	LTSPQQSGQGQQPGQLQ	HMW-glutenin
VPPDCSTINVP	gamma-gliadin			NVVESIRQQQ	avenin	TSPQQPGQGQQLGQGQQPGHGQQL	HMW-glutenin	YLQPQQPISQQQ	alpha-gliadin	LWQPGQGQQGYASPYH	HMW-glutenin
VPPECSIIKAPF	gamma-gliadin			PFLQTQVEQL	avenin	TTVSPHQGQQTTVSPHPGQQTTVSPH	HMW-glutenin	YLQPQQPISQQQAQ	alpha-gliadin	PIATSPQQPGQGQQLGQGQQPGHGQ	HMW-glutenin
VPPECSIIRAPF	gamma-gliadin			QGMYQPQQPAQL	avenin	TTVSPHQGQQTTVSPHQGQQTT	HMW-glutenin	YLQPQQPISQQQAQQQ	alpha-gliadin	PQQPGQGQGQQGYY	HMW-glutenin
VQGQGIIQPQQL	gamma-gliadin			QKLNPCRDAL	avenin	TTVSPHQGQQTTVSPHQGQQTTVSPHQG	HMW-glutenin	YLQPQQPISQQQAQQQQ	alpha-gliadin	PQQPGQGQGQQGYYPG	HMW-glutenin
VQGQGIIQPQQLAQL	gamma-gliadin			QKLNPCRDALL	avenin	TVSPHQGQQTTVSPHQGQQTTVSPH	HMW-glutenin	YLQPQQPISQQQAQQQQQ	alpha-gliadin	PTSPQQPGQGQQPGQLQ	HMW-glutenin
VQGQGIIQPQQPAQL	gamma-gliadin			QKLNPCRDALLQ	avenin	TVSPHQGQQTTVSPHQGQQTTVSPHQGQ	HMW-glutenin	YSQPQQPISEQQQQQQQQQQQ	alpha-gliadin	QFPQQQQFPQQHQSPQQQFPQQQFPQQQL	HMW-glutenin
VQGQGVAQPQQL	gamma-gliadin			QQLQEQLKPCATF	avenin	TVVPPKGGSFYPGETTP	HMW-glutenin	YSQPQQPISQ	alpha-gliadin	QPGQGQQGYYPTSLWQPGQGQQPGQGQQG	HMW-glutenin
VQGQGVAQPQQLAQM	gamma-gliadin			QQQQQPGQRQLL	avenin	TVVPPKGGSFYPGETTPLQQ	HMW-glutenin	YSQPQQPISQQ	alpha-gliadin	QPGQGQQPGQGQPGYYPTSPQQPGQGKQPGQGQ	HMW-glutenin
VQPTQQQPYPESQQPF	gamma-gliadin			QTLPSMCSVNIPQY	avenin	VEQPSASLK	HMW-glutenin	YSQPQQPISQQQ	alpha-gliadin	QPGQGQQPGQGQQGYYPTSPQQPVQGQQLGQGQP	HMW-glutenin
VQQQIPVVQPSIL	gamma-gliadin			RSQVVQHSSCL	avenin	VEQPSASLKVA	HMW-glutenin	YSQPQQPISQQQQ	alpha-gliadin	QPGQGQQPGQWQQLGQGQQPGHGKQGYYPT	HMW-glutenin
VQQQIPVVQPSILQ	gamma-gliadin			SFGQPQQQVPVEIM	avenin	VEQPSASLKVAK	HMW-glutenin	YSQPQQPISQQQQQ	alpha-gliadin	QQPGQGQQPGQGYYPT	HMW-glutenin
VQQQVDHGF	gamma-gliadin			SLHTLPSMC	avenin	VEQPSASLKVAKAQ	HMW-glutenin	YSQPQQPISQQQQQQ	alpha-gliadin	QQPGQGQQTEQTGQGQQPGQ	HMW-glutenin
VQQQVDHGFVQSQL	gamma-gliadin			SQPQHQVPIEITRM	avenin	VSPGTRQYEQQPVVPSKAGSFYPS	HMW-glutenin	YSQPQQPISQQQQQQQ	alpha-gliadin	RVVDQQLVGQLPWSTG	HMW-glutenin
VRPDCSTINAPF	gamma-gliadin			SSCQIVQHQCCQQL	avenin	VSPHPGQQTTVSPHQGQQTTVSPH	HMW-glutenin	YSQPQQPISQQQQQQQQ	alpha-gliadin	SFYPGGTAPPLQQGGW	HMW-glutenin
VRPDCSTINAPFA	gamma-gliadin			SVNIPQYCTTTPCST	avenin	VSPHPGQQTTVSPHQGQQTTVSPHQG	HMW-glutenin	YSQPQQPISQQQQQQQQQ	alpha-gliadin	SLHQSGQGQQGYYP	HMW-glutenin
VSIILPRSDCQVM	gamma-gliadin			TTISPSSDVTTDMGGY	avenin	VSPHQGQQTTVSPHQGQQTTVSPH	HMW-glutenin	YSQPQQPISQQQQQQQQQIL	alpha-gliadin	SLHQSGQGQQGYYPS	HMW-glutenin
VSPDCSTINAP	gamma-gliadin			TTTPCSTITPTIY	avenin	VSPHQGQQTTVSPHQGQQTTVSPHPGQQ	HMW-glutenin	YSQPQQPISQQQQQQQQQQE	alpha-gliadin	SLQQPGQGLQGHYPA	HMW-glutenin
VSPDCSTINAPFAN	gamma-gliadin			VIQTIPAMCDVHVPPY	avenin	VSPHQGQQTTVSPHQGQQTTVSPHQ	HMW-glutenin	YSQPQQPISQQQQQQQQQQQ	alpha-gliadin	SLQQPGQGLQGHYPAS	HMW-glutenin
VVGSLVIQTL	gamma-gliadin			VPVQCQQQQQL	avenin	VSPHQGQQTTVSPHQGQQTTVSPHQG	HMW-glutenin	YSQPQQPISQQQQQQQQQQQQ	alpha-gliadin	SLQQPGQGQQGHY	HMW-glutenin
YEAIRAILY	gamma-gliadin			VQATSTQPQQQQQQGQQQQQGL	avenin	VSPHQGQQTTVSPHQGQQTTVSPHQGQ	HMW-glutenin	YSQPQQPISQQQQQQQQQQQQQIL	alpha-gliadin	SLQQPGQGQQGHYP	HMW-glutenin
YLQQQLNPCKEF	gamma-gliadin			VQGISTQPQQQQQ	avenin	VSPHQGQQTTVSPHQGQQTTVSPHQGQQTTVSPH	HMW-glutenin	YSQPQQPISQQQQQQQQQQQQQQ	alpha-gliadin	SLQQPGQGQQGHYPA	HMW-glutenin
YQQPQQTFPQPQ	gamma-gliadin			VQGISTQPQQQQQQ	avenin	VSVEQPSASLK	HMW-glutenin	AIHNVAEAIRQ	avenin	SLQQPGQGQQIGKGKQGY	HMW-glutenin
YQQPQQTFPQPQQAF	gamma-gliadin			ANIDAGIGGQ	gamma-gliadin	VVVPPKGGSFYPGETTPPQQLQQS	HMW-glutenin	AIHNVAEAIRQQQPQQQW	avenin	SLQQPGQGQQIGKGKQGYYPT	HMW-glutenin
YQQPQQTFPQPQQAFPHQPQ	gamma-gliadin			ANINEQSRCPAIQ	gamma-gliadin	VYYPTSPQQPGQLQ	HMW-glutenin	AIHNVVESIRQQ	avenin	SLQQPGQGQQIGQGQQGY	HMW-glutenin
AISPQQSGQGQQGY	HMW-glutenin			ANINEQSRCPAIQTIVH	gamma-gliadin	YEQQTEVPSKGGSFYPGGTAPP	HMW-glutenin	AIHNVVESIRQQQ	avenin	SLQQPGQGQQIGQGQQGYY	HMW-glutenin
CCQQLRDVSPECRPVAL	HMW-glutenin			AQGLGIIQPQQPAQL	gamma-gliadin	YYPGQASSQRPGQGQQE	HMW-glutenin	AIHSVVEAIMQQQSQQQW	avenin	SLQQPGQGQQQGQGQQGYY	HMW-glutenin
EQQPVVPSKAGSF	HMW-glutenin			AQLEAIRSL	gamma-gliadin	YYPGQASSQRPGQGQQEY	HMW-glutenin	AIILQQQQQL	avenin	SLQQPGQGQQQGQGQQGYYP	HMW-glutenin
EQQPVVPSKAGSFYPSETTPSQQL	HMW-glutenin			AQMEAIRTL	gamma-gliadin	YYPGQASSQRPGQGQQEYY	HMW-glutenin	AQIPEQF	avenin	SLQQPGQGQQQGQGQQGYYPT	HMW-glutenin
EQQTEVPSKGGSFYPGGTAPP	HMW-glutenin			AQQQPSIEEQHQL	gamma-gliadin	AQGTFLQPHQIAQ	LMW-glutenin	AQISEQARCH	avenin	SLQQPGQGQQSGQGQQSGQGHQPGQGQQSGQEKQGYD	HMW-glutenin
EQTVVPPKGGSFYPGETTPL	HMW-glutenin			ASIVADIGGQ	gamma-gliadin	EATTSIALR	LMW-glutenin	AQISEQARCQ	avenin	SLQQSGQGQPGY	HMW-glutenin
GCQASSPKQGLGSLY	HMW-glutenin			ASIVAGIGGQ	gamma-gliadin	ETFPQQPPSSQQQQPFPQQPP	LMW-glutenin	AQISEQARCQAV	avenin	SLQQSGQGQPGYY	HMW-glutenin
GGGLTTEQPQGGKQPF	HMW-glutenin			CCQELAQIPQQL	gamma-gliadin	FLQPHQIAQ	LMW-glutenin	AQISEQARCQAVC	avenin	SLQQSGQGQPGYYPT	HMW-glutenin
HQQGGGFGGGLTTEQPQGGKQPF	HMW-glutenin			CQQPQQTIPQPHQTF	gamma-gliadin	FLQPHQIAQLEATT	LMW-glutenin	AVCGVAQVIM	avenin	SLQQTGQGQQSGQGQQGYY	HMW-glutenin
HVSVEQPSASL	HMW-glutenin			CSVNVPLY	gamma-gliadin	FLQPHQIAQLEATTS	LMW-glutenin	AVCSVAQIIM	avenin	SLQQTGQGQQSGQGQQGYYS	HMW-glutenin
LQPGQGQQGPY	HMW-glutenin			EMQVNPSVQVQPTQQQPYPESQQPF	gamma-gliadin	FVHPSILQQLDPCKVFLQQQCSPVAMPQS	LMW-glutenin	CRVNIPQY	avenin	SLWQPGQGQQGYASPY	HMW-glutenin
LQPGQGQQGPYQ	HMW-glutenin			FIQPQQPFPQQPQQPY	gamma-gliadin	GTFLQPHQIAR	LMW-glutenin	CTTTPCSTIT	avenin	SLWQPGQGQQGYASPYHVS	HMW-glutenin
LQPGQGQQGYYPTSL	HMW-glutenin			FIQPQQPFPQQPQQTY	gamma-gliadin	LQPHQIAQLE	LMW-glutenin	CTTTPCSTITP	avenin	SPHQGQQTTVSPHQGQQTTVSPHQG	HMW-glutenin
LQPGQGQQGYYPTSPQQSGQGQQL	HMW-glutenin			FLQPQQPQQSFPQQQQPL	gamma-gliadin	LQPHQIAQLEATTS	LMW-glutenin	CTTTPCSTITPA	avenin	SPLQPGQGQPGYD	HMW-glutenin
LRDVSPECRPVAL	HMW-glutenin			FSQPQQQFPQPQQPQ	gamma-gliadin	LQPHQISQLE	LMW-glutenin	CTTTPCSTITPAIY	avenin	SQQPFPQQPQQP	HMW-glutenin
NPSGTSTQQPGQVQQL	HMW-glutenin			FVLPQQQAQF	gamma-gliadin	METSHIPGLEKPSQQQPLP	LMW-glutenin	CTTTPCSTITPTIY	avenin	SQQQPGQGPQPGQWQ	HMW-glutenin
QCERELQESSLEAC	HMW-glutenin			GIIQPQQPAQL	gamma-gliadin	PILPQQPPFSQQQQPQFSQQQQPFPQ	LMW-glutenin	CTTTPCSTITQTPY	avenin	SSLQPEQGQQGYYPT	HMW-glutenin
QCERELQESSLEACR	HMW-glutenin			GPSGQVQWPQQQPF	gamma-gliadin	PPFSQQQQPPFSQQQQPSFSQQQQQPPFTQQQQPPF	LMW-glutenin	DVHVPPY	avenin	SSQQSGQGHQSGQGQQGYYP	HMW-glutenin
QIGQGQQGYYPTSL	HMW-glutenin			GQGIIQPQQLAQL	gamma-gliadin	PQQPFPQQPQQPFPQQPQQPVPQRPQQQFPQLP	LMW-glutenin	EQLKPCATF	avenin	SSQQSGQGHQSGQGQQGYYPT	HMW-glutenin
QLRDVSPECRPVAL	HMW-glutenin			GQGIIQPQQPAQL	gamma-gliadin	PQQPFPQQPQQPVPQQQQP	LMW-glutenin	EQMKPCVAF	avenin	SVAVSQVARQY	HMW-glutenin
QLVYYPTSPQQPGQL	HMW-glutenin			GQGIIQPQQPAQY	gamma-gliadin	PQQPPFSQQQPPLSQQQQQPP	LMW-glutenin	EQQPTPQPQEQPVPH	avenin	SVAVSQVARQYEQ	HMW-glutenin
QQGSYPSTTSPQQSGQGQQGY	HMW-glutenin			GQGIIQPQQPTQL	gamma-gliadin	QPQPFPQQPQPFPQQPFPSRQPFPQQPPFW	LMW-glutenin	GLGSSQPQQQTQLDQGW	avenin	SWQGQQGYHQS	HMW-glutenin
QQLRDVSPECRPVAL	HMW-glutenin			GQGTLVQGQGIIQPQQL	gamma-gliadin	QPQQPFPQQPQQPVPQQPQ	LMW-glutenin	GQCQQQPQPQPQMN	avenin	SWQGQQGYHQSVT	HMW-glutenin
QQPGLGQQGYYPT	HMW-glutenin			GQSIIQQQPAQL	gamma-gliadin	QQPFPQQPQQPCPQQPQQSSPQPQQPFPQQPQ	LMW-glutenin	GQCQQQPQPQPQMNTCAAF	avenin	SWQGQQGYHQSVTSS	HMW-glutenin
QQPGQGQQIGQGQQGY	HMW-glutenin			GQVEWPQQQPLPQPQQPVYQQPQ	gamma-gliadin	QQPPFPQQQQPPFSQQQQPSFSQQQQQPPFTQ	LMW-glutenin	GQPQQQQGQSF	avenin	TEVPSKGGSFYPGGTAPPLQQGGW	HMW-glutenin
SLLQPGQGQQGPY	HMW-glutenin			GSIQSQQQQPQQL	gamma-gliadin	QQPPFSHQQPILPQQPPFSQQQQLVLPQQPPFSQ	LMW-glutenin	GQPQQQVPIEIR	avenin	TSLQQPGQGQQPGQGYYPTSPQQP	HMW-glutenin
SLQQSGQGQQGY	HMW-glutenin			GSLVQGQGIIQPQQPAQL	gamma-gliadin	QQPPFSQQQQPPFSQQQQQPPFTQQQQPSFSQQPP	LMW-glutenin	GQQQQQQLQEQLTPCTTF	avenin	TSPHQPGQWQQPGQGQQGY	HMW-glutenin
STSSPQQQAQGCQASSPKQGL	HMW-glutenin			HQPQQTFPQPQQTY	gamma-gliadin	QQPPFSQQQQPPFSQQQQQQQQQQQQPFTQQQPPF	LMW-glutenin	GQQQQQQQLQEQLTPCATFL	avenin	TSPQQPGQGQQLGQGQQPGHGQQ	HMW-glutenin
SYPSATFPQQPGQGQGQQGYYPGATSL	HMW-glutenin			IQPQQPAQL	gamma-gliadin	QQPPISQQQQPPFSQQQQPVLPQQQIPFVHPSILQ	LMW-glutenin	GQSQQQQQPGQRQLL	avenin	TSPQQPGQGQQLGQGQQPGHGQQL	HMW-glutenin
TEQPQGGKQPF	HMW-glutenin			IQPQQPFPQQPQQTY	gamma-gliadin	SHIPGLEKPSQQQPLPLQ	LMW-glutenin	GSSQPQQQTQLDQGW	avenin	TTVSPHQGQQTTVSPHQGQQTTVSPH	HMW-glutenin
TQQKPGQGYNPGGTSPL	HMW-glutenin			IQPSLQQQL	gamma-gliadin	SQKQQPVLPQQP	LMW-glutenin	HHQPQQEVQLEGL	avenin	TVSPHQGQQTTVSPHPGQQTTVSPHQGQQTT	HMW-glutenin
YPSAISPQQSGQGQQGY	HMW-glutenin			IQPSLQQQLNPC	gamma-gliadin	SQKQQPVLPQQPAFSQ	LMW-glutenin	IPVQCPAPTTY	avenin	TVSPHQGQQTTVSPHQGQQTT	HMW-glutenin
CCQQLPQIPEQF	LMW-glutenin			IQSSLQQQMNPC	gamma-gliadin	VQQQIPVVQPSILQQLDPCKVFLQQQCSPVA	LMW-glutenin	IPVQCPATTTTP	avenin	TVSPHQGQQTTVSPHQGQQTTVSP	HMW-glutenin
CCQQLPQIPEQI	LMW-glutenin			IVQGQSIIQQQPAQL	gamma-gliadin	AELIIPQQPQQPFPLQP	omega	IVVEAIIQQQ	avenin	TVSPHQGQQTTVSPHQGQQTTVSPH	HMW-glutenin
CCQQLPQISEQF	LMW-glutenin			KCTAIDSIVH	gamma-gliadin	AELIIPQQPQQPFPLQPHQP	omega	IVVEAIIQQQSQQQW	avenin	TVSPHQGQQTTVSPHQGQQTTVSPHQG	HMW-glutenin
CNVNVSLY	LMW-glutenin			KCTAIDSIVHA	gamma-gliadin	AELIIPQQPQQPFPLQPHQPYTQQ	omega	IYIPVQCPAPTA	avenin	TVVPPKGGSFYPGETTP	HMW-glutenin
CQQLPQIPEQI	LMW-glutenin			KTLPTMCN	gamma-gliadin	ELIIPQQPQQPFPLQP	omega	IYVPVQCQ	avenin	VEQPSASLK	HMW-glutenin
CQQLPQIPQQSRY	LMW-glutenin			KTLPTMCNVY	gamma-gliadin	IIPQQPQQPFPLQPHQPYTQQ	omega	IYVPVQCQQQQQL	avenin	VEQPSASLKVAK	HMW-glutenin
CSVNVPVY	LMW-glutenin			LCNVHVPPY	gamma-gliadin	IPQQPQQPFPLQPHQP	omega	KAIQSVEEAIIQQQPQQQW	avenin	VSPHPGQQTTVSPHQGQQTTVSPHQG	HMW-glutenin
CVSQPQQQLQQQL	LMW-glutenin			LIQPSLQQ	gamma-gliadin	KELQSPQQSFSY	omega	KLNPCRDALL	avenin	VSPHQGQQTTVSPHQGQQTTVSP	HMW-glutenin
CVSQPQQQSQQQL	LMW-glutenin			LLQQCKPVSL	gamma-gliadin	LIIPQQPQQPFPLQPHQ	omega	LQEQLTPCTTF	avenin	VSPHQGQQTTVSPHQGQQTTVSPH	HMW-glutenin
CVSQPQQQSQQQLGQQPQQQQL	LMW-glutenin			LLQQCKPVSLV	gamma-gliadin	LIIPQQPQQPFPLQPHQP	omega	LQHQCSPVTVPFPQIPVDQPT	avenin	VSPHQGQQTTVSPHQGQQTTVSPHQ	HMW-glutenin
DAIRAITY	LMW-glutenin			LLQQCRPV	gamma-gliadin	LIIPQQPQQPFPLQPHQPYTQQ	omega	LQHQCSPVTVPFPQIPVDQPTSC	avenin	VSPHQGQQTTVSPHQGQQTTVSPHQG	HMW-glutenin
EATTSIALR	LMW-glutenin			LLQQCRPVS	gamma-gliadin	LQPQQPVPQQPQRP	omega	LQHQCSPVTVPFPQIPVDQPTSCQNVQH	avenin	VSPHQGQQTTVSPHQGQQTTVSPHQGQ	HMW-glutenin
ELGQCVSQPQQQSQQQLGQQPQQQQL	LMW-glutenin			LLQQCRPVSL	gamma-gliadin	PFPQPQLQFPQQPEQIIPQQPEQIITQQP	omega	LQHQCSPVTVPFPQIPVDQPTSCQNVQHQ	avenin	VSPHQGQQTTVSPHQGQQTTVSPHQGQQTTVSPHQG	HMW-glutenin
FSQKQQPVLPQQPAF	LMW-glutenin			LLQQCTLDEKV	gamma-gliadin	PQQPFPLQPHQPYTQQ	omega	LQQCSPVADMSF	avenin	VSVEQPSASLK	HMW-glutenin
FSQQQQPFPQQQQPL	LMW-glutenin			LLQQCTLDEKVPL	gamma-gliadin	PQQPFPLQPQQPFSLQPQQPFPQQPQQPFPP	omega	LQQCSQTPHVQ	avenin	VVDQQLVGQLPWSTG	HMW-glutenin
GLQQPILSQQQPCTPQ	LMW-glutenin			LQGQGIIQPQQPAQL	gamma-gliadin	PQQPFPQQPQQPFPLQPQQSFPLRPQQP	omega	LQQQCSPVTVPFPQIPVD	avenin	VVDQQLVGQLPWSTGL	HMW-glutenin
GQCVSQPQQQL	LMW-glutenin			LQPQQAFPQQPQQPFPQ	gamma-gliadin	PQQPFPQQPQQPFPLQPQQSFPLRPQQPFP	omega	LQQQCSPVTVPFPQIPVDQPTSCQ	avenin	VVVPPKGGSFYPGETTPPQQLQQS	HMW-glutenin
GQCVSQPQQQLQQQL	LMW-glutenin			LQPQQPFPQQPQQPY	gamma-gliadin	PQQPFPQQPQQPQQPFSQPQQQLPLQPQQP	omega	LQQQCSPVTVPFPQIPVDQPTSCQNVQHQ	avenin	VYYPTSPQQPGQL	HMW-glutenin
GQCVSQPQQQSQQQL	LMW-glutenin			LQPQQPQQSFPQQQQPL	gamma-gliadin	PQQPFSQQPQQPFPWQPQQPFPQPQQPIAHQ	omega	LQTQVEQL	avenin	VYYPTSPQQPGQLQ	HMW-glutenin
GQCVSQPQQQSQQQLGQQPQQQQL	LMW-glutenin			LQQCKPASL	gamma-gliadin	PQQQQLSQQQFPRPQQSPEQQQFPQQPP	omega	LQTQVEQLSSC	avenin	WLQPGQGQQGYYP	HMW-glutenin
GQQPQQQQVPQGIF	LMW-glutenin			LQQCKPVSL	gamma-gliadin	QIIPQQPFPLQPQPFPQQP	omega	LQTQVEQLSSCQIVQY	avenin	WLQPGQGQQGYYPT	HMW-glutenin
GQQPQQQQVQQGTF	LMW-glutenin			LQQCKPVSLVS	gamma-gliadin	QIIPQQPQQPFPLQPQQPSPQQPQLPFPQPQQP	omega	LRSQVVQHSSCL	avenin	YEQQPVVPSKAGSFY	HMW-glutenin
GQQQVGQCSF	LMW-glutenin			LQQCNPVSL	gamma-gliadin	QPFPLQPQQPFPQQPQQPFPEPQQPIP	omega	LSSCQIVQHQ	avenin	YEQQPVVPSKAGSFYPS	HMW-glutenin
GQWPQQQQVPQGTL	LMW-glutenin			LQQCNPVSLVSSL	gamma-gliadin	QPFPQQPQQPFPQPQQQLPLQPQQPFPQPQQP	omega	MCRVNIPQY	avenin	YEQQTEVPSKGGSF	HMW-glutenin
GSIQTPQQQPQQL	LMW-glutenin			LQQQCSPVAMPQR	gamma-gliadin	QPQQPFPQPQLPFPLQPQQPFPQQPQQPFP	omega	NVAEAIRQQQPQ	avenin	YEQQTEVPSKGGSFYPGGTAPP	HMW-glutenin
GTLLQPHQIAQL	LMW-glutenin			LQQQLNPCKEF	gamma-gliadin	QPQQPFPQQPHQPQQPFPQPQLPFSQQSEQIISQQPQQPFPQQP	omega	NVAEAIRQQQPQQQ	avenin	YGSPYHVSVEQPSASLK	HMW-glutenin
GVSQPQQQL	LMW-glutenin			LQQQLVPQLQQPL	gamma-gliadin	RQINPSEQEL	omega	NVAEAIRQQQPQQQW	avenin	YLTSPLQLGQGQQGYY	HMW-glutenin
GVSQPQQQLQQEQVGQC	LMW-glutenin			LQQQMNPCKNF	gamma-gliadin	RQINPSEQELQ	omega	NVAESIRQQQ	avenin	YLTSPLQLGQGQQGYYPT	HMW-glutenin
GVSQPQQQSQQQQVGQCSF	LMW-glutenin			LQQQVNPCKNF	gamma-gliadin	RQLNPSEQELESPQQPVLK	omega	NVNIPQY	avenin	YPTSPQQPGQLQ	HMW-glutenin
LFPQQPSF	LMW-glutenin			LVQGQGIIQPQQPAQL	gamma-gliadin	RQLNPSEQELQSPQQPVPKEQ	omega	NVVESIRQQ	avenin	YYPGQASSQRPGQGQQE	HMW-glutenin
LLQPHQIAQL	LMW-glutenin			NIQVDPSGQVQWPQQQQPFPQPQQPF	gamma-gliadin	RQLNPSSQELQSPQ	omega	NVVESIRQQQ	avenin	YYPGQASSQRPGQGQQPGQGQ	HMW-glutenin
LQEQPQQSVQGVSQPQQQLQQEQVGQC	LMW-glutenin			PHQPQQQFPQPQQPQQQF	gamma-gliadin	RQLNPSSQELQSPQQ	omega	NVVESIRQQQH	avenin	YYPGQASSQRPGQGQQPGQGQQE	HMW-glutenin
LQEQPQQSVQGVSQTQQQL	LMW-glutenin			PLSQQQQVGQGSL	gamma-gliadin	RQLNPSSQELQSPQQSY	omega	PFLQTQVEQL	avenin	YYPGQASSQRPGQGQQPGQGQQEY	HMW-glutenin
LQEQPQQX	LMW-glutenin			PQQPFLQPQQPQQPFPQ	gamma-gliadin	TQLPFPQQPEQIIPQQPQQPFPQQPQQP	omega	QAVCSVAQIIM	avenin	YYPTSPQQPGQLQ	HMW-glutenin
LQPHQIAQLE	LMW-glutenin			PQQPQQPFLQPQQPYPQQPQQPFPQTQQPQ	gamma-gliadin	TQQPFPLQPQQPFPQQPQRP	omega	QEQLTPCTTF	avenin	YYPTSPQQSGQGQSGY	HMW-glutenin
LQPHQIAQLEATT	LMW-glutenin			PQQPQQPFPQTQQPQ	gamma-gliadin			QGMYQPQQPAQHESIRM	avenin	ELPILPQQPPFSQQQQPQFSQQ	LMW-glutenin
LQPHQIAQLEATTSXAL	LMW-glutenin			PQQPQQPFPQTQQPQQPFPQ	gamma-gliadin			QGMYQPQQPAQL	avenin	FLQPHQIAQLEATTS	LMW-glutenin
LQPHQIAQLEVM	LMW-glutenin			PQQPQQPYPQQPQQPFPQTQQPQ	gamma-gliadin			QKLNPCRDAL	avenin	FLQPHQLAHLE	LMW-glutenin
LQPHQIAQLEX	LMW-glutenin			PQQQPPFIQPSLQ	gamma-gliadin			QKLNPCRDALL	avenin	FVQPQQQQPQQSGQGVSQHQQ	LMW-glutenin
LQPHQISQLEVM	LMW-glutenin			PQQQPSLIQQSL	gamma-gliadin			QKLNPCRDALLQ	avenin	GVSQPQQPXQ	LMW-glutenin
LQPHQLAQL	LMW-glutenin			PQTQQPQQPFPQ	gamma-gliadin			QLDTTCSQGY	avenin	IVLQEQQHGQGFNQPQ	LMW-glutenin
LQPHQLAQLEA	LMW-glutenin			PSGQVQWPQ	gamma-gliadin			QLGQQQQQQLQEQLTPCTTF	avenin	IVLQEQQHGQGL	LMW-glutenin
LQQPILSQQQPCTPQ	LMW-glutenin			PSGQVQWPQQQLVPQPQQPL	gamma-gliadin			QLQEQLKPCATF	avenin	LQPHQIAQLEATTS	LMW-glutenin
LQQQCIPVAM	LMW-glutenin			PSGQVQWPQQQQPFPQPQQPF	gamma-gliadin			QLQEQLTPCATF	avenin	LQQQIPFVHPS	LMW-glutenin
LQQQCIPVAMQ	LMW-glutenin			PSSQVQWPQ	gamma-gliadin			QPQQPAQHESIRM	avenin	LQQQIPFVHPSI	LMW-glutenin
LQQQCSPVAM	LMW-glutenin			PSSQVQWPQQQPVPQPHQPF	gamma-gliadin			QQCSPVADM	avenin	LQQQIPFVHPSIL	LMW-glutenin
LQQQCSPVAMP	LMW-glutenin			QAFPQPQQTF	gamma-gliadin			QQCSPVADMSF	avenin	LQQQIPFVHPSILQ	LMW-glutenin
LQQQCSPVAMPQ	LMW-glutenin			QAFPQPQQTFPHQPQ	gamma-gliadin			QQQCSPVTVPFPQIPVDQPTSCQ	avenin	LQQQIPFVHPSILQQ	LMW-glutenin
LQQQCSPVAMPQS	LMW-glutenin			QCAAIHGIVH	gamma-gliadin			QQQQPGQRQLL	avenin	LQQQIPFVHPSILQQL	LMW-glutenin
LQQQCSPVP	LMW-glutenin			QIFPQPQQTFPHQPQ	gamma-gliadin			QQQQQGQQQQGQGSSQPQQQTQLDQGW	avenin	LQVQIPFVHPSIL	LMW-glutenin
LQQQCSPVPMPQ	LMW-glutenin			QIPVVQPSIL	gamma-gliadin			QQQQQPGQRQLL	avenin	LVLPQQQIPFVHPSI	LMW-glutenin
LQQQCSPVPMPQR	LMW-glutenin			QIQCAALH	gamma-gliadin			QQTQLDQGW	avenin	LVLPQQQIPFVHPSIL	LMW-glutenin
LQQQCSPVPVPQ	LMW-glutenin			QLANINEQSRCPAIQ	gamma-gliadin			QTLPSMCNIY	avenin	PFPQQQTPLPQEQHRQQ	LMW-glutenin
LQQQCSPVRMP	LMW-glutenin			QLAQIPEQY	gamma-gliadin			QTLPSMCNVNIPQY	avenin	PILPQQPPFSQQQQPQFSQQ	LMW-glutenin
LVQGVSQPQQQSQQQQVGQCSF	LMW-glutenin			QLAQIPQHL	gamma-gliadin			QTLPSMCSVNIPQY	avenin	PILPQQPPFSQQQQPQFSQQQQPFPQ	LMW-glutenin
NQPQQQQPQQSVQGVSQPQQQQKQL	LMW-glutenin			QLAQIPQQL	gamma-gliadin			RCEAIHNVVH	avenin	PPFSQQQPIPPQGPPFSQQTQPVLPQQSPF	LMW-glutenin
PQQLQQFGQQPQQQQIP	LMW-glutenin			QLARIPQQL	gamma-gliadin			RMLLENLSLM	avenin	PPFSQQQQLVLPQQPPFSQQQQTQFYLP	LMW-glutenin
PQQPQPFPQQPIPQQPQPY	LMW-glutenin			QLFPQSQQPQQQF	gamma-gliadin			RSQVVQHSSCL	avenin	PPFSQQQQPVIPQQPPFPQQQQPVLPQQQ	LMW-glutenin
QCCQQLPQIPEQL	LMW-glutenin			QLVPQLQQPL	gamma-gliadin			SFGQPQQQVPVEIM	avenin	PPFSQQQQPVLPQQQACPR	LMW-glutenin
QLGQCVSQPQQQL	LMW-glutenin			QLVQGQGIIQPQQPAQL	gamma-gliadin			SIYIPVQCPAPTT	avenin	PPFSQQQQPVLPQQQACPRQQP	LMW-glutenin
QLGQCVSQPQQQSQQQL	LMW-glutenin			QLVQQQLPVVQPSIL	gamma-gliadin			SLHTLPSMC	avenin	PQIPEQFRHE	LMW-glutenin
QLPPFSQQLPPFSQQ	LMW-glutenin			QMNPCKNF	gamma-gliadin			SQPQQQTQLDQGW	avenin	PQIPEQFRHEA	LMW-glutenin
QLPQIPEQF	LMW-glutenin			QQEQQQGVPILRPL	gamma-gliadin			SRCEAIHNVVH	avenin	PQPYPQQPFPPQQAFPQQP	LMW-glutenin
QLPQIPEQI	LMW-glutenin			QQFPQPQQPQQQF	gamma-gliadin			SSCQIVQHQCCQQL	avenin	PQQPFPQQPRFSQQQQ	LMW-glutenin
QLPQIPQQSRY	LMW-glutenin			QQFPQPQQPQQSFPQ	gamma-gliadin			SSQPQQQTQLDQGW	avenin	PQQPFPQQPYPQQPQPYPQQPQPYP	LMW-glutenin
QLPQQQISIVQPSVL	LMW-glutenin			QQFPQPQQPQQSFPQSQQP	gamma-gliadin			STQPQQQQQQGQQQQQGL	avenin	PQQPPFSQQQPPLSQQQQQPP	LMW-glutenin
QLQQIPEQSRY	LMW-glutenin			QQFPQPQQPQQSLPQQQQPL	gamma-gliadin			SVNIPQYCTTTPCST	avenin	PQQPPFWPQQPFPQQPP	LMW-glutenin
QLVQGVSQPQQQSQ	LMW-glutenin			QQFPQSQQPQQPFPQPQQQF	gamma-gliadin			SVVEAIMQQQSQQQW	avenin	PQQPPFWPQQPFPQQPPF	LMW-glutenin
QLVQGVSQPQQQSQQQQVGQC	LMW-glutenin			QQLAQIPQQL	gamma-gliadin			TIPAMCDVHVPPY	avenin	PQQPQPYPQQPQSFPQQPFPSQQP	LMW-glutenin
QLVQGVSQPQQQSQQQQVGQCSF	LMW-glutenin			QQLNPCKNIL	gamma-gliadin			TLPSMCSVNIPQY	avenin	PQQQIPFVHPS	LMW-glutenin
QQIPSVQPSIL	LMW-glutenin			QQLPQPQQPQQSFPQ	gamma-gliadin			TQVEQLSSCQIVQY	avenin	PSILQQLNPCKLFPQQQCSPV	LMW-glutenin
QQISIVQPSVL	LMW-glutenin			QQLPQPQQPQQSFPQQQRPF	gamma-gliadin			TSTQPQQQQQQGQQQQQGL	avenin	QLPPFSQQLPPFSQQ	LMW-glutenin
QQLGQQPQQQQI	LMW-glutenin			QQLPVVQPSIL	gamma-gliadin			TTISPSID	avenin	QLPPFSQQLPPFSQQQQPV	LMW-glutenin
QQLNPCKIF	LMW-glutenin			QQLVPQPQQPL	gamma-gliadin			TTISPSIDVT	avenin	QLPPFSQQLPPFSQQQQPVLPQQPP	LMW-glutenin
QQLNPCKVF	LMW-glutenin			QQLVQQQLPVVQPSIL	gamma-gliadin			TTISPSIDVTTG	avenin	QLPPFSQQLPPFSQQQQPVLPQQPPFSQQ	LMW-glutenin
QQLPQIPEQF	LMW-glutenin			QQPFPQPHQPF	gamma-gliadin			TTISPSSDVTT	avenin	QLPPFSQQQQPPFSQQQQPVLPQQPSFSQQ	LMW-glutenin
QQLPQIPEQL	LMW-glutenin			QQPFPQQPQLPH	gamma-gliadin			TTTPCSTITPTIY	avenin	QLPPFSQQQSPFSQQ	LMW-glutenin
QQLPQIPQQSRY	LMW-glutenin			QQPFPQQPQLPHQH	gamma-gliadin			TVPFPQIPVDQPTSCQ	avenin	QLPPFSQQQSPFSQQQQI	LMW-glutenin
QQPCTPQQTPXPQGQLY	LMW-glutenin			QQPPFIQPSLQ	gamma-gliadin			VAEAIRQQQPQQQW	avenin	QPFPQQTSFSQQQP	LMW-glutenin
QQPILSQQQPCTPQ	LMW-glutenin			QQPQLPFPQQPQQPFPQ	gamma-gliadin			VEQLSSCQIVQY	avenin	QPHPQEPQQLFPQSQQPQQP	LMW-glutenin
QQPLLPQQPPF	LMW-glutenin			QQPVPQPHQPF	gamma-gliadin			VIQTIPAMCDVHVPPY	avenin	QPPFSQQQPPFSQQQQPPQQQQPPLPQQPP	LMW-glutenin
QQPPFSQQLQPPFSQQ	LMW-glutenin			QQQCCQELAQIPQQL	gamma-gliadin			VIQTIPAMCDVHVPPYCY	avenin	QPPFSQQQPPFSQQQQPVLPQQPPFSEQQPPF	LMW-glutenin
QQPQPQQGQQQQVPQSVL	LMW-glutenin			QQQLNPCKNF	gamma-gliadin			VIVRQQQGQ	avenin	QPPFSQQQQQPVLPQQTPLSQQQ	LMW-glutenin
QQPQPQQVGQQQQVPQSAF	LMW-glutenin			QQQPFPQPQQPF	gamma-gliadin			VIVRQQQGQSF	avenin	QPPFSQQQQQQQPPFSQQQQPPFSQQPP	LMW-glutenin
QQPQPQQX	LMW-glutenin			QQQQQQQQQQGIQI	gamma-gliadin			VNIPQYC	avenin	QPPPFSQQLPPFSQQQQPV	LMW-glutenin
QQPQQQLGQQPQQQQQQVL	LMW-glutenin			QQQQQQQQQQQGMHILL	gamma-gliadin			VPVQCQQQQQL	avenin	QPPPFSQQLPPFSQQQQPVLPQQPP	LMW-glutenin
QQPQQQLGQQPQQQQVQQGTF	LMW-glutenin			QQQQVGQGTL	gamma-gliadin			VPVQCQQQQQM	avenin	QPQPFPQQPPCSQQQQPP	LMW-glutenin
QQPVIPQQPPF	LMW-glutenin			QQQQVGQGTLVQGQ	gamma-gliadin			VQATSTQPQQQQQQGQQQQQGL	avenin	QPQPFPQQPPCSQQQQPPF	LMW-glutenin
QQPVLPQQPPFSQQ	LMW-glutenin			QQQQVGQGTLVQGQGIIQPQQPAQL	gamma-gliadin			VQGISTQPQQQQ	avenin	QPQPFPQQPQPFPQQP	LMW-glutenin
QQPVLPQQPPFSQQQ	LMW-glutenin			QQVNPCKNF	gamma-gliadin			VQGISTQPQQQQQ	avenin	QPQPFPQQQPCSQQQQQPP	LMW-glutenin
QQPVLPQQPSF	LMW-glutenin			QQVPQPQQPQQPF	gamma-gliadin			VQGISTQPQQQQQQ	avenin	QPQPFSQQQPCSQQQQQPLSQQQQPPFSQQQPP	LMW-glutenin
QQPVLPQQQIPSVQPSIL	LMW-glutenin			QSFPQQQPPFIQPSLQ	gamma-gliadin			VQGISTQPQQQQQQGQ	avenin	QPQQPQQPFPQPQQSIPQPQQPFPQPQ	LMW-glutenin
QQPVLPQQQIPY	LMW-glutenin			QSFPQQQPSLIQQSL	gamma-gliadin			VQGISTQPQQQQQQGQQQ	avenin	QPYPQQPYPQQPQP	LMW-glutenin
QQPXPQQPQPY	LMW-glutenin			QSFPQQQQPL	gamma-gliadin			VQGISTQPQQQQQQGQQQQGQ	avenin	QQKQLGQCSFQQPQQQQLGQWPQQQQVPQ	LMW-glutenin
QQQCCQQLPQIPEQF	LMW-glutenin			QSFPQQQRPF	gamma-gliadin			VQGISTQPQQQQQQGQQQQGQGSSQPQ	avenin	QQPPFSHQQPILPQQPPFSQQQQLVLPQQPPFSQ	LMW-glutenin
QQQCCQQLPQIPEQL	LMW-glutenin			QTFPHQPQQQFPQPQQPQQQF	gamma-gliadin			VQGISTQPQQQQQQGQQQQGQGSSQPQQQTQLDQGW	avenin	QQPPFSQKQQPPFSQQQQSPFSQQQQQP	LMW-glutenin
QQQLGQQPQQQQI	LMW-glutenin			QTFPHQPQQQVPQPQQPQQPF	gamma-gliadin			XQQQCSPVTVPFPQIPVDQPTSC	avenin	QQPPFSQQEQPVLPQQSPFSQQ	LMW-glutenin
QQQPCTPQQTPLPQGQLY	LMW-glutenin			QTFPQPQQTY	gamma-gliadin			XQQQCSPVTVPFPQIPVDQPTSCQNVQH	avenin	QQPPFSQQLQPPFSQQ	LMW-glutenin
QQQPILPQQPPFSQQQQPVLL	LMW-glutenin			QTLPSMCNVY	gamma-gliadin			XQQQCSPVTVPFPQIPVDQPTSCQNVQHQC	avenin	QQPPFSQQPPFSQQQQQQPLPQQPSFSQQQPP	LMW-glutenin
QQQPILSQQQPCTPQ	LMW-glutenin			QTYPQRPQQPFPQ	gamma-gliadin			AIIMQQEQQGIQ	gamma-gliadin	QQPPFSQQPQISQQQQQQQP	LMW-glutenin
QQQPLPPQQTFPQQPL	LMW-glutenin			QVGQGSLVQGQGIIQPQQPAQL	gamma-gliadin			AIIMQQEQQGIQIL	gamma-gliadin	QQPPFSQQQLPPFSQQLPPFSQQQLPPFSQ	LMW-glutenin
QQQQPQQLGQCVSQPQQQL	LMW-glutenin			RTLPTMC	gamma-gliadin			ANINEQSRCPA	gamma-gliadin	QQPPFSQQQPILPQQPPFSQQQQPVQPQQP	LMW-glutenin
QQQVGQCSF	LMW-glutenin			RTLPTMCN	gamma-gliadin			ANINEQSRCPAIQ	gamma-gliadin	QQPPFSQQQPIPPQQPPF	LMW-glutenin
QQQVPQSAF	LMW-glutenin			SIIMQQEQ	gamma-gliadin			ANINEQSRCPAIQT	gamma-gliadin	QQPPFSQQQPIPPQQPPFSQQQQ	LMW-glutenin
QQSQQQQVGQCSF	LMW-glutenin			SIIMQQEQQEQ	gamma-gliadin			AQGLGIIQPQQPAQL	gamma-gliadin	QQPPFSQQQPPVLPQQPP	LMW-glutenin
QSGQGVSQPQQQL	LMW-glutenin			SIIMQQEQQEQL	gamma-gliadin			AQLEAIRSL	gamma-gliadin	QQPPFSQQQPPVLPQQPPF	LMW-glutenin
QSVQGVSQPQQQQKQL	LMW-glutenin			SIIMQQEQQEQRQ	gamma-gliadin			AQMEAIRTL	gamma-gliadin	QQPPFSQQQQPFPQQP	LMW-glutenin
QTPLPQGQQDQML	LMW-glutenin			SIIMQQEQQEQRQG	gamma-gliadin			AQQQPSIEEQHQL	gamma-gliadin	QQPPFSQQQQPLFSLQQQPPFSQQQPPFSQQQQPVLPQQ	LMW-glutenin
QXVQGVSQPQQQ	LMW-glutenin			SIIMQQEQQEQRQGV	gamma-gliadin			ASIVAGIGGQ	gamma-gliadin	QQPPFSQQQQPPCSQQQQPP	LMW-glutenin
RHEAIRAIVY	LMW-glutenin			SIIMQQEQQEQRQGVQ	gamma-gliadin			CCQELAQIPQQL	gamma-gliadin	QQPPFSQQQQPPFLQQQQQQQP	LMW-glutenin
RTLPTMCNVN	LMW-glutenin			SIIMQQEQQQQQ	gamma-gliadin			CLQQPQHQFPQPT	gamma-gliadin	QQPPFSQQQQPPFSQQQPPVSQQQ	LMW-glutenin
SFQQPQPQQVGQQQQVPQSAF	LMW-glutenin			SIIMQQEQQQQQQQ	gamma-gliadin			ELAQIPQQL	gamma-gliadin	QQPPFSQQQQPPFSQQQQPPFSQQQPPVSQQQ	LMW-glutenin
SIFLQEQPQQLVEGVSQPQQQ	LMW-glutenin			SIIMQQEQRQ	gamma-gliadin			FIQPQQPFPQQPQQTY	gamma-gliadin	QQPPFSQQQQPPFSQQQQQPPFTQQQQPSFSQQPP	LMW-glutenin
SIFLQEQPQQSVQ	LMW-glutenin			SIIMQQEQRQG	gamma-gliadin			FLQPQHTFPLQPQ	gamma-gliadin	QQPPFSQQQQPPFTQQQQIPVIHPSVLQQ	LMW-glutenin
SIFLQEQPQQSVQGVSQTQQQL	LMW-glutenin			SIIMQQEQRQGV	gamma-gliadin			FQLVQGQGIIQPQQPAQL	gamma-gliadin	QQPPFSQQQQPSFSQQQQQPPFTQQQQPP	LMW-glutenin
SIILQEQQQGF	LMW-glutenin			SIIMQQEQRQGVQ	gamma-gliadin			FVLPQQQAQF	gamma-gliadin	QQPPFSQQQQPSFSRQQQPSFSQQQQPSFSQ	LMW-glutenin
SIILQEQQQVQ	LMW-glutenin			SIIMQQEQRQGVQI	gamma-gliadin			GIIQPQQPAQL	gamma-gliadin	QQPPFSQQQQQFPQHNQP	LMW-glutenin
SIILQEQQQVQGSIQ	LMW-glutenin			SIIMQQQQQQGLQIL	gamma-gliadin			GILVQGQGIIQPQQPAQL	gamma-gliadin	QQPPFSQQQQQFPQQQQPLLPQQPP	LMW-glutenin
SIILQEQQQVQGSIQTQ	LMW-glutenin			SIIMQQQQQQQ	gamma-gliadin			GQGIIQPQQLAQL	gamma-gliadin	QQPPFSQQQQQFPQQQQPLLPQQPPFSQHQQP	LMW-glutenin
SIILQQQQQQQ	LMW-glutenin			SIIMQQQQQQQQ	gamma-gliadin			GQGIIQPQQPAQL	gamma-gliadin	QQPPFSQQQQQFPQQQQPLLPQQPPFSQQ	LMW-glutenin
SIILQQQQQQQQ	LMW-glutenin			SIIMQQQQQQQQQ	gamma-gliadin			GQGTLVQGQGIIQPQQL	gamma-gliadin	QQPPFSQQQQQPVLPQQTPLSQQQQPVLQQQPP	LMW-glutenin
SIILQQQQQQQQQ	LMW-glutenin			SIIMQQQQQQQQQQ	gamma-gliadin			HQPQQQFPQPQQPQQSF	gamma-gliadin	QQPPFSQQQQQQQQQQQPP	LMW-glutenin
SIILQQQQQQQQQQ	LMW-glutenin			SIIMQQQQQQQQQQGMH	gamma-gliadin			HQPQQQFPQPQQPQQSFPQ	gamma-gliadin	QQPQFSQQQQAPYSQQQQPP	LMW-glutenin
SIVLQEQPLQ	LMW-glutenin			SIIVQQQQQQ	gamma-gliadin			HQPQQTFPQPQQTY	gamma-gliadin	QQPQPFPQQPIPQQPQPFPQQPQPYPQQPQ	LMW-glutenin
SIVLQEQPQ	LMW-glutenin			SIIVQQQQQQQ	gamma-gliadin			HTFPQPQQTFPHQPQ	gamma-gliadin	QQQLGQQPQQQQLTHGA	LMW-glutenin
SIVLQEQPQQ	LMW-glutenin			SIIVQQQQQQQQ	gamma-gliadin			IILPRSDCQVM	gamma-gliadin	QQQPPFSQQQPILPQQPPFSQQQQPVQPQQP	LMW-glutenin
SIVLQEQPQQL	LMW-glutenin			SIIVQQQQQQQQQ	gamma-gliadin			IIWPQSDCQVM	gamma-gliadin	QQQPPPFSQQLPPFSQQQQPVLPQQPPFSQQ	LMW-glutenin
SIVLQEQQH	LMW-glutenin			SIIVQQQQQQQQQQ	gamma-gliadin			IQPQQPAQL	gamma-gliadin	QQQQPPFSQQQQPQFSQQQQPQYSQQQQP	LMW-glutenin
SIVLQEQQHGQ	LMW-glutenin			SIIVQQQQQQQQQQQ	gamma-gliadin			IQPSLQQQL	gamma-gliadin	QQQSPFSQQQQQQPPFLQQQQP	LMW-glutenin
SIVLQEQQHGQGF	LMW-glutenin			SIIWPQSDCQVM	gamma-gliadin			IQPSLQQQLNPC	gamma-gliadin	SHIPGLEKPSQQQPLP	LMW-glutenin
SIVLQEQQHGQGL	LMW-glutenin			SIVHSIIMQQEQQEQ	gamma-gliadin			IWPQSDCQVM	gamma-gliadin	SHIPGLERPSQQQPLPPQQT	LMW-glutenin
SIVLQEQQHGQGLN	LMW-glutenin			SIVMQQEQQQGIQ	gamma-gliadin			KCTAIDSIVH	gamma-gliadin	SIVLQEQPQQ	LMW-glutenin
SIVLQEQQQVR	LMW-glutenin			SIVMQQEQQQGIQI	gamma-gliadin			KCTAIDSIVHA	gamma-gliadin	SQKQQPVLPQQP	LMW-glutenin
SIVLQEQSLQ	LMW-glutenin			SLQQQLNPCKNF	gamma-gliadin			KTLPTMCN	gamma-gliadin	SQKQQPVLPQQPA	LMW-glutenin
SIVLQEQSLQLVQ	LMW-glutenin			SLQQQMNPC	gamma-gliadin			KTLPTMCNVY	gamma-gliadin	SQQQLPPFSQQQQPPFSQQQQPVLPQQPSFSQQ	LMW-glutenin
SIVLREQSLQ	LMW-glutenin			SLQQQMNPCKNF	gamma-gliadin			LCNVHVPPY	gamma-gliadin	TQPVIPQQSPFSQQQQL	LMW-glutenin
SIVLREQSLQL	LMW-glutenin			SLVLGTLPTMCN	gamma-gliadin			LCNVHVPPYCSPF	gamma-gliadin	TTRVPFGVGTGVGGY	LMW-glutenin
SLLLQQQQQQ	LMW-glutenin			SLVLQTLPSMCN	gamma-gliadin			LCNVHVPSDCY	gamma-gliadin	TTTRVPFGVGTGVGG	LMW-glutenin
SQKQQPVLPQQPAF	LMW-glutenin			SMIWPQSDCQVM	gamma-gliadin			LLQQCKPVS	gamma-gliadin	TTTRVPFGVGTGVGGY	LMW-glutenin
SQQLPPFSQQ	LMW-glutenin			SQQPQQAFPQPQ	gamma-gliadin			LLQQCKPVSL	gamma-gliadin	VQVQIPFVHPSIL	LMW-glutenin
SQQQLPPFSQQLPPFSQQ	LMW-glutenin			SQQPQQIFPQPQ	gamma-gliadin			LLQQCNPEEKL	gamma-gliadin	VQVQIPFVHPSILQ	LMW-glutenin
SQQQPCTPQQTPLPQGQLY	LMW-glutenin			SQQPQQIFPQPQQTF	gamma-gliadin			LLQQCNPVSL	gamma-gliadin	VVQPSILQQLNPCKLFPQQQCSPV	LMW-glutenin
SQQQPCTQDQTPL	LMW-glutenin			SQQPQQIFPQPQQTFPHQPQ	gamma-gliadin			LLQQCRPVS	gamma-gliadin	AELIIPQQPQQPFPLQPHQ	omega
SQQQPCTQEQTPL	LMW-glutenin			SQQPQQPFPQPQQPQQSFPQQQQPL	gamma-gliadin			LLQQCRPVSL	gamma-gliadin	AELIIPQQPQQPFPLQPHQP	omega
SQQQPILPQQPPFSQQQQL	LMW-glutenin			SQQPQQPFPQPQQQF	gamma-gliadin			LLQQCTLDEKV	gamma-gliadin	AELIIPQQPQQPFPLQPHQPY	omega
SQQQQIPVIHPSVL	LMW-glutenin			SQQPQQTFPQPQQTF	gamma-gliadin			LLQQCTLDEKVPL	gamma-gliadin	AELIIPQQPQQPFPLQPHQPYT	omega
SQQQQPLLPQQPPF	LMW-glutenin			SQQPQQTFPQPQQTFPHQPQ	gamma-gliadin			LQGQGIIQPQQPAQL	gamma-gliadin	AELIIPQQPQQPFPLQPHQPYTQ	omega
SQQQQPPFSQQQPPF	LMW-glutenin			SQQPQQTFPQPQQTFPHQPQQQFPQPQQPQQQF	gamma-gliadin			LQPQQAFPQQPQQPF	gamma-gliadin	AELIIPQQPQQPFPLQPHQPYTQQ	omega
SQQQQPPFSQQQQSPF	LMW-glutenin			SQQQQLGQGTL	gamma-gliadin			LQPQQAFPQQPQQPFPQ	gamma-gliadin	AELIIPQQPQQPFPLQPHQPYTQQT	omega
SQQQQPVIPQQPPF	LMW-glutenin			SQQQQPVLPPQQSPFPQQQQQHQQL	gamma-gliadin			LQPQQPFPQQPQQPY	gamma-gliadin	EFPQQQFPQQQFHQQ	omega
SQQQQPVLPPQQSPFPQQQQHQQL	LMW-glutenin			SQQQQVGQGIL	gamma-gliadin			LQPQQPQQSFPQQQQPL	gamma-gliadin	ELIIPQQPQQPFPLQP	omega
SQQQQPVLPQQPPFSQQ	LMW-glutenin			SQQQQVGQGSL	gamma-gliadin			LQPSIQQ	gamma-gliadin	FPQPQQPMPLQPQQPFPQQPP	omega
SQQQQPVLPQQQPVIIL	LMW-glutenin			SQQQQVGQGSLVQ	gamma-gliadin			LQQCKPASL	gamma-gliadin	IIPQQPQQPFPLQPHQP	omega
SQQQQQPILPQQPPFSQQ	LMW-glutenin			SQQQQVGQGSLVQGQGIIQPQQPAQL	gamma-gliadin			LQQCNPVSL	gamma-gliadin	IIPQQPQQPFPLQPHQPYTQQ	omega
SQQQQQPLLPQQPPF	LMW-glutenin			SQQQQVGQGSLVQGQGIIQPQQPAQLEA	gamma-gliadin			LQQCNPVSLVSSL	gamma-gliadin	IPQQPQQPFPLQPHQ	omega
SQQQQQPVLPQQQIPF	LMW-glutenin			SQQQQVGQGTL	gamma-gliadin			LQQQCSPVAMPQR	gamma-gliadin	IPTPLQPQQPFPQQP	omega
SQQQQVGQCSF	LMW-glutenin			SQQQQVGQGTLVQ	gamma-gliadin			LQQQLNPCKEF	gamma-gliadin	KELQSPQQSF	omega
SVLLQPHQIAQL	LMW-glutenin			SQQQQVGQGTLVQGQ	gamma-gliadin			LQQQLVPQLQQPL	gamma-gliadin	LIIPQQPQQPFPLQP	omega
SVQGVSQPQQQL	LMW-glutenin			SSVVAGIGGQ	gamma-gliadin			LQQQMNPCKNF	gamma-gliadin	LIIPQQPQQPFPLQPHQ	omega
TPQQTPLPQGQLY	LMW-glutenin			TIIHSIIMQQEQ	gamma-gliadin			LVLPQQPPFSQQ	gamma-gliadin	LIIPQQPQQPFPLQPHQP	omega
TVLPQQPAFSQQQHQQL	LMW-glutenin			TIIHSIIMQQEQQ	gamma-gliadin			LVLQTLPTMCNVY	gamma-gliadin	LIIPQQPQQPFPLQPHQPYTQ	omega
VLPQQPPFSQQQQ	LMW-glutenin			TIIHSIIMQQEQQEQ	gamma-gliadin			LVQGQGIIQPQQPAQL	gamma-gliadin	LIIPQQPQQPFPLQPHQPYTQQ	omega
VLQQQCCQQLPQIPEQF	LMW-glutenin			TIIHSIIMQQEQQEQQQ	gamma-gliadin			LVQGQGIIQPQQPAQY	gamma-gliadin	LPQQEFPQQQIS	omega
VLQQQCCQQLPQIPEQI	LMW-glutenin			TQQPQQLFPQSQQPQQQF	gamma-gliadin			NIQVDPSGQVQWPQ	gamma-gliadin	LPQQEFPQQQISQQPQQLPQQQQIPQQP	omega
VQGVSQPQQQSQL	LMW-glutenin			TQQPQQPFPQ	gamma-gliadin			NIQVDPSGQVQWPQQQQPFPQPQQPF	gamma-gliadin	LPQQEFPQQQISQQPQQLPQQQQIPQQPQQ	omega
VQGVSQPQQQSQLH	LMW-glutenin			TQQPQQPFPQQPQQPFPQ	gamma-gliadin			NLQVDPSGQVQW	gamma-gliadin	LPQQEFPQQQISQQPQQLPQQQQIPQQPQQF	omega
VQPQQQQPHQSGQGVSQPQQQL	LMW-glutenin			TQQPYPQQQPL	gamma-gliadin			PFPQSQQLQQPFP	gamma-gliadin	PFPQQPQQPFPEPQQPIPVQQ	omega
VQPQQQQPHQSGQGVSQPQQQLQQQQL	LMW-glutenin			VFVPPECSTT	gamma-gliadin			PHQPQQQFPQPQQPQQQF	gamma-gliadin	PFPQQPQQPFPQPQLPFPQQPEQIIPQQP	omega
VQPQQQQPQQSGQGVSQHQQQSQQQQQL	LMW-glutenin			VFVPPECSTTKAPF	gamma-gliadin			PHQPQQQVPQPQQPQQPF	gamma-gliadin	PIQPQQPFPQQPE	omega
VQPQQQQPQQSGQGVSQSQQQSQQQL	LMW-glutenin			VLKTLPTM	gamma-gliadin			PQFQQPHQPF	gamma-gliadin	PLQPQQPFPQQPEQ	omega
VQPQQQQPQQSVQGVY	LMW-glutenin			VLKTLPTMCN	gamma-gliadin			PQQPFLQPQQPQQPFPQ	gamma-gliadin	PQPQQQLPLLPQQPFPQPQQP	omega
VSQPQQQSQQQL	LMW-glutenin			VLQTIPTMCNVY	gamma-gliadin			PQQPQLPHQH	gamma-gliadin	PQQPFPLQPHQP	omega
XQQQPCTPQQTPXPQGQLY	LMW-glutenin			VLQTLPSMCN	gamma-gliadin			PQQPQQPFPQTQQPQ	gamma-gliadin	PQQPFPLQPHQPYTQQ	omega
YEAIRAIVY	LMW-glutenin			VLRTLPNMCNVY	gamma-gliadin			PQQPQQPFPQTQQPQQPFPQ	gamma-gliadin	PQQPFPQPQEPIPQQ	omega
IIPQQPQQPFPLQPHQPY	omega-gliadin			VLRTLPTM	gamma-gliadin			PQQPRLPFPQQPQ	gamma-gliadin	PQQPFPQPQQPNPQQPQQ	omega
ILQPQQPLPQQPQQPF	omega-gliadin			VPPDCSTINIPY	gamma-gliadin			PQQQFLQAQQPQ	gamma-gliadin	PQQPFPQPQQQFPWQPQQP	omega
LPQQPFPVQQPF	omega-gliadin			VPPECSIIKAPF	gamma-gliadin			PQRPQQPFPQ	gamma-gliadin	PQQPFPQQAQQPFTQQPQQPFP	omega
LQQPYPQNPY	omega-gliadin			VPPECSIIRAPF	gamma-gliadin			PQTQQPQQPFPQ	gamma-gliadin	PQQPFPQQPQQPFPQPQQPFSWQPQQPFLQ	omega
PLQPHQPY	omega-gliadin			VQGQGIIQPQQL	gamma-gliadin			PQTQQPQQPFPQFQQPHQPF	gamma-gliadin	PQQPFPWQPQQPFPQPQEPIPQQ	omega
QQPQQSYPVQPQQPFPQPQPVPQ	omega-gliadin			VQGQGIIQPQQLAQL	gamma-gliadin			PQTQQPQQPFPQQPQQPFPQ	gamma-gliadin	PQQPFPWQPQQPFPQTQQWFPL	omega
QQQLPLQPQQPFSQP	omega-gliadin			VQGQGIIQPQQPAQL	gamma-gliadin			PSGQVQWPQ	gamma-gliadin	PQQPFSLQLQQPFPQQP	omega
				VQGQGIIQPQQPAQLE	gamma-gliadin			PSGQVQWPQQQLVPQPQQPL	gamma-gliadin	PQQPFSLQPQQPFSQP	omega
				VQGQGIIQPQQPAQLEVIRSL	gamma-gliadin			PSSQVQWPQQQPVPQPHQPF	gamma-gliadin	PQQPYPQQPYPPQQPYPSQQPFP	omega
				VQGQGIIQPQQPAQY	gamma-gliadin			QAFPQPQQTF	gamma-gliadin	PQQQFPWQPQQPFP	omega
				VQGQGIIQPQQPTQL	gamma-gliadin			QAFPQPQQTFPHQPQ	gamma-gliadin	PQQQQFPQQQQLTQQQFPRPQQSPEQQQFPQQPKQFPQQQF	omega
				VQPTQQQPYPESQQPF	gamma-gliadin			QAFPQPQQTFPHQPQQQVPQPQQPQQPF	gamma-gliadin	PQQQQLSQQQFPRPQQSPEQQQFPQQPP	omega
				VQQQIPVVQPSIL	gamma-gliadin			QAFPQQPQQPFPQ	gamma-gliadin	PQQSFPQQPQQPFPQQPQQIIFQQPQQSY	omega
				VQQQIPVVQPSILQ	gamma-gliadin			QCAAIHGIVH	gamma-gliadin	QLPQQQFPQQQFPQQQFPQQQ	omega
				VQQQLPVVQPSI	gamma-gliadin			QFPLPQQPFPQQPQQPFPQSQQQ	gamma-gliadin	QPFPQPEQPFPQQS	omega
				VRPDCSNIRTPF	gamma-gliadin			QHPQQQFPQPQQPQ	gamma-gliadin	QPFPQPQQPIPVQPQQPFPQ	omega
				VRPDCSTINAPFA	gamma-gliadin			QIFPQPQQTFPHQPQ	gamma-gliadin	QPFSQPQQPFPQQPGQIIPQPQQPFP	omega
				VSIILPRSDCQVM	gamma-gliadin			QIPVVQPSIL	gamma-gliadin	QPQQFPQQQQFPQQEFPQQQQIPQQPQQF	omega
				VSPDCSTINAPFA	gamma-gliadin			QIQCAALH	gamma-gliadin	QPQQPFPLQPQQPFPQQPPQQPE	omega
				VSPDCSTINAPFAN	gamma-gliadin			QLANINEQSRCPAIQ	gamma-gliadin	QPQQPFPQPQLPFPLQPQQPFPQQPQQPFP	omega
				VYVPPECSIIKAPF	gamma-gliadin			QLAQIPQQL	gamma-gliadin	QPQQPFPQQPEQIIPQQPQQPF	omega
				VYVPPECSIM	gamma-gliadin			QLAQLEAIRSL	gamma-gliadin	QQFPEQSQQPFTQPQQ	omega
				YLQQQLNPCKEF	gamma-gliadin			QLFPQSQQPQQQF	gamma-gliadin	QQFPQQPQQQFPQQQFPIPYPPQQQSQEA	omega
				YQQPQHTFPQPQQTF	gamma-gliadin			QLVPQLQQPL	gamma-gliadin	QQFPQQQFPQQQFPQQEFPQQQQL	omega
				YQQPQHTFPQPQQTFPHQPQ	gamma-gliadin			QLVQGQGIIQPQQPAQL	gamma-gliadin	QQIPLQPQQLPQQQ	omega
				YQQPQQTFPQPQ	gamma-gliadin			QLVQGQGIIQPQQPAQY	gamma-gliadin	QQPFPQPQQPTLIQPQQP	omega
				YQQQQVGQGTL	gamma-gliadin			QMNPCKNF	gamma-gliadin	QQPFPTPQQQFPHQSQQP	omega
				YQQQQVGQGTLVQ	gamma-gliadin			QPQQPFPQPQQPQQPFSQPQQPFPQPQQPQQPF	gamma-gliadin	QQPQQPSPLRPQQP	omega
				YQQQQVGQGTLVQGQGIIQPQQPAQL	gamma-gliadin			QPQQPQPF	gamma-gliadin	RQLNPSSQELQSP	omega
				AISPQQSGQGQQGY	HMW-glutenin			QPQQQFLQPQQPQ	gamma-gliadin	RQLNPSSQELQSPQQSY	omega
				CCQQLRDVSPECRPVAL	HMW-glutenin			QQCNPVSLVSSI	gamma-gliadin	SFPQPQPQQPQQPS	omega
				DISPECHPVVVSPVAGQY	HMW-glutenin			QQFPQPQQPQQQ	gamma-gliadin
				EACRQVVDQQL	HMW-glutenin			QQFPQPQQPQQQF	gamma-gliadin
				EQQPVVPSKAGSFYPSETTPSQQL	HMW-glutenin			QQFPQPQQPQQSFPQ	gamma-gliadin
				EQQPVVPSKAGSFYPSETTPSQQLQQ	HMW-glutenin			QQFPQPQQPQQSFPQQQRPF	gamma-gliadin
				EQTVVPPKGGSF	HMW-glutenin			QQFPQRPLLPF	gamma-gliadin
				EQTVVPPKGGSFYPGETTPL	HMW-glutenin			QQLAQIPQQL	gamma-gliadin
				GCQASSPKQGLGSLY	HMW-glutenin			QQLGQGMPIQL	gamma-gliadin
				HQQGGGFGGGLTTEQPQGGKQPF	HMW-glutenin			QQLNPCKNF	gamma-gliadin
				HQSGQGQQGYYPSSL	HMW-glutenin			QQLNPCKNI	gamma-gliadin
				HVSVEQPSASL	HMW-glutenin			QQLPQPQQPQQSFPQ	gamma-gliadin
				KGYYPSAISPQQSGQGQQGY	HMW-glutenin			QQLPQPQQPQQSFPQQQRPF	gamma-gliadin
				LQPGQGQQGPY	HMW-glutenin			QQLPVVQPSIL	gamma-gliadin
				LQPGQGQQGPYQ	HMW-glutenin			QQLVPQPQQPL	gamma-gliadin
				LQPGQGQQGYYPTSL	HMW-glutenin			QQLVQQQLPVVQPSIL	gamma-gliadin
				LQPGQGQQGYYPTSPQQSGQGQQL	HMW-glutenin			QQPFPQQPQLPH	gamma-gliadin
				LQPGQGQQGYYPTSSQQSGQGHQSGQGQQGY	HMW-glutenin			QQPFPQQPQLPHQH	gamma-gliadin
				LQPGQGQQGYYPTSSQQSGQGHQSGQGQQGYYPTSL	HMW-glutenin			QQPPFIQPSLQ	gamma-gliadin
				LTSPQQSGQGQQPGQL	HMW-glutenin			QQPQLPFPQQPQQPFPQ	gamma-gliadin
				LTSPQQSGQGQQPGQLQQSAQGQ	HMW-glutenin			QQPVPQPHQPF	gamma-gliadin
				PTSPQQPGQGQQPGQLQQPAQGQQGQQL	HMW-glutenin			QQQCCQELAQIPQQL	gamma-gliadin
				QCERELQESSLEAC	HMW-glutenin			QQQPFPQPQQPF	gamma-gliadin
				QCERELQESSLEACR	HMW-glutenin			QQQPGQAF	gamma-gliadin
				QELGQGQQGYYPT	HMW-glutenin			QQQQQQVQQQVDHGF	gamma-gliadin
				QELGQGQQGYYPTSL	HMW-glutenin			QQQQVGQGTL	gamma-gliadin
				QLGQGQQSGQGQL	HMW-glutenin			QQQQVGQGTLVQGQGIIQPQQPAQL	gamma-gliadin
				QLRDVSPECRPVAL	HMW-glutenin			QQVDHGFVQSQL	gamma-gliadin
				QPEQLQQPTQGQQRQQPGQGQQL	HMW-glutenin			QQVNPCKNF	gamma-gliadin
				QQGSYPSTTSPQQSGQGQQGY	HMW-glutenin			QQVPQPQQPQQPF	gamma-gliadin
				QQLGQGQSGYYPTSPQQPGQGQQPGQL	HMW-glutenin			QSFPQQQPPFIQPSLQ	gamma-gliadin
				QQPEQGQPGYYPTSPQQPGQL	HMW-glutenin			QSFPQQQPSLIQQSL	gamma-gliadin
				QQPGLGQQGYYPT	HMW-glutenin			QSFPQQQQPL	gamma-gliadin
				QQPGQGQQIGQGQQGY	HMW-glutenin			QSFPQQQRPF	gamma-gliadin
				QQPGQGQQIGQGQQGYYPTSPQ	HMW-glutenin			QTFPHQPQQQFPQPQQPQQQF	gamma-gliadin
				QQPGQGQQIGQGQQGYYPTSPQHTGQ	HMW-glutenin			QTFPHQPQQQVPQPQQPQQPF	gamma-gliadin
				QQPGQGQQQGQGQQGYYPT	HMW-glutenin			QTFPQPQQTY	gamma-gliadin
				QQPGQGQQQGQGQQGYYPTSL	HMW-glutenin			QTLPSMCNVY	gamma-gliadin
				QQSGQGQPGYYPTSL	HMW-glutenin			QVQWPQQQPFPQPQQPF	gamma-gliadin
				QQSGQGQQGHYPTSL	HMW-glutenin			RTLPTMC	gamma-gliadin
				QQVGQGQQIGQL	HMW-glutenin			RTLPTMCN	gamma-gliadin
				QQVGQGQQIGQLGQ	HMW-glutenin			SGQVQWPQQQLVPQPQQPL	gamma-gliadin
				QXGQGQQGYYPT	HMW-glutenin			SIILPPSDCQVM	gamma-gliadin
				RDVSPECRPVAL	HMW-glutenin			SIIMQQEQQEQ	gamma-gliadin
				SLHQSGQGQQGYYPSSL	HMW-glutenin			SIIMQQEQQEQL	gamma-gliadin
				SLLQPGQGQQGPY	HMW-glutenin			SIIMQQEQQEQLQG	gamma-gliadin
				SLQQPGQGQQGHY	HMW-glutenin			SIIMQQEQQEQLQGVQ	gamma-gliadin
				SLQQPGQGQQGHYPASL	HMW-glutenin			SIIMQQEQQEQRQGVQ	gamma-gliadin
				SLQQPGQGQQIGQGQQGY	HMW-glutenin			SIIMQQEQQGIQ	gamma-gliadin
				SLQQSGQGQPGYYPTSL	HMW-glutenin			SIIMQQEQQQQQ	gamma-gliadin
				SLQQTGQGQQSGQGQQGYY	HMW-glutenin			SIIMQQEQQQQQQ	gamma-gliadin
				SQQRPPF	HMW-glutenin			SIIMQQEQQQQQQQ	gamma-gliadin
				SSQQPGQLQQL	HMW-glutenin			SIIMQQEQRQ	gamma-gliadin
				SSSLQQPGQGLQGHYPASL	HMW-glutenin			SIIMQQEQRQGV	gamma-gliadin
				SYPSATFPQQPGQGQGQQGYYPGATS	HMW-glutenin			SIIMQQEQRQGVQ	gamma-gliadin
				SYPSATFPQQPGQGQGQQGYYPGATSL	HMW-glutenin			SIIMQQQQQQQ	gamma-gliadin
				TASLQQPGQGQQGHYPASL	HMW-glutenin			SIIMQQQQQQQQQ	gamma-gliadin
				TEQPQGGKQPF	HMW-glutenin			SIIMQQQQQQQQQQ	gamma-gliadin
				TVQGYYPSVSSPQQGPY	HMW-glutenin			SIIMQQQQQQQQQQGM	gamma-gliadin
				VAKAQQPATQLPT	HMW-glutenin			SIIMQQQQQQQQQQGMH	gamma-gliadin
				VAKAQQPATQLPTVC	HMW-glutenin			SIIVQQQQQQ	gamma-gliadin
				VYYPTSPQQPGQL	HMW-glutenin			SIIVQQQQQQQ	gamma-gliadin
				YPGQASPQQPGQGQQPGKW	HMW-glutenin			SIIVQQQQQQQQ	gamma-gliadin
				YPISPQQSGQGQQPGQGQQGY	HMW-glutenin			SIIVQQQQQQQQQ	gamma-gliadin
				YPSAISPQQSGQGQQGY	HMW-glutenin			SIIVQQQQQQQQQQ	gamma-gliadin
				YPTSPQQSGQGQQL	HMW-glutenin			SIIVQQQQQQQQQQQ	gamma-gliadin
				YYPSVTSPQQVSY	HMW-glutenin			SIIVQQQQQQQQQQQQ	gamma-gliadin
				CCQQLPQIPEQF	LMW-glutenin			SIIVQQQQQQQQQQQQQ	gamma-gliadin
				CCQQLPQIPEQI	LMW-glutenin			SIIVQQQQQQQQQQQQQQ	gamma-gliadin
				CCQQLPQIPQ	LMW-glutenin			SIIWPQSDCQVM	gamma-gliadin
				CCQQLPQISEQF	LMW-glutenin			SIVMQQEQQQGIQ	gamma-gliadin
				CSVNVPLYE	LMW-glutenin			SIVMQQEQQQGIQI	gamma-gliadin
				CSVNVPLYETT	LMW-glutenin			SIVMQQEQQQGIQIL	gamma-gliadin
				CSVNVPVY	LMW-glutenin			SKQPQQPFPQPQQPQQSFPQQQPS	gamma-gliadin
				CVSQPQQQLQQQL	LMW-glutenin			SLQQQLNPCKNF	gamma-gliadin
				EATTSIALR	LMW-glutenin			SLQQQMNPC	gamma-gliadin
				ELGQCVSQPQQQSQQQL	LMW-glutenin			SLQQQMNPCKNF	gamma-gliadin
				FAQQQQPFPQQQQPL	LMW-glutenin			SLVQGQGIIQPQQPAQL	gamma-gliadin
				FLQPHQLAQL	LMW-glutenin			SMIWPQSDCQVM	gamma-gliadin
				FSQQQQPFPQQQQPL	LMW-glutenin			SQPQQQFPQPQQPQQSFPQQQPPFIQPSLQ	gamma-gliadin
				FSQQQQQQLFPQQPSF	LMW-glutenin			SQQPQQAFPQPQ	gamma-gliadin
				FVHPSILQ	LMW-glutenin			SQQPQQAFPQPQQTF	gamma-gliadin
				FVQPQQQQPQQSGQGVSQSQQQSQQQL	LMW-glutenin			SQQPQQAFPQPQQTFPHQPQ	gamma-gliadin
				GQCVSQPQQQL	LMW-glutenin			SQQPQQAFPQPQQTFPHQPQQQVPQPQQPQQPF	gamma-gliadin
				GQCVSQPQQQLQQQL	LMW-glutenin			SQQPQQIFPQPQ	gamma-gliadin
				GQCVSQPQQQSQQQL	LMW-glutenin			SQQPQQIFPQPQQTF	gamma-gliadin
				GQCVSQPQQQSQQQLGQQPQQQQL	LMW-glutenin			SQQPQQIFPQPQQTFPHQPQ	gamma-gliadin
				GQQPQQQQQQVL	LMW-glutenin			SQQPQQPFPQ	gamma-gliadin
				GQQPQQQQVQQGTF	LMW-glutenin			SQQPQQPFPQPQQPQQSFPQQQQPL	gamma-gliadin
				GQQQVGQCSF	LMW-glutenin			SQQPQQPFPQPQQQF	gamma-gliadin
				GSIQTPQQQPQQL	LMW-glutenin			SQQPQQTFPQPQQTF	gamma-gliadin
				GSIQTQQQQPQEL	LMW-glutenin			SQQPQQTFPQPQQTFPHQPQ	gamma-gliadin
				GSIQTQQQQPQELGQCVSQPQQQ	LMW-glutenin			SQQPQQTFPQPQQTFPHQPQQQF	gamma-gliadin
				GSIQTQQQQPQELGQCVSQPQQQSQQQL	LMW-glutenin			SQQQQLGQGTL	gamma-gliadin
				GVSQPQQPXQ	LMW-glutenin			SQQQQVGQGIL	gamma-gliadin
				GVSQPQQQSQQQQVGQCSF	LMW-glutenin			SQQQQVGQGILVQ	gamma-gliadin
				ILPQQPPFSQQQQL	LMW-glutenin			SQQQQVGQGSLVQ	gamma-gliadin
				LFPQQPSF	LMW-glutenin			SQQQQVGQGSLVQGQ	gamma-gliadin
				LLQPHQIAQL	LMW-glutenin			SQQQQVGQGSLVQGQGIIQPQQPAQL	gamma-gliadin
				LQEQCSPVAMPQ	LMW-glutenin			SQQQQVGQGSLVQGQGIIQPQQPAQLEA	gamma-gliadin
				LQPHQIAQLE	LMW-glutenin			SSVVAGIGGQ	gamma-gliadin
				LQPHQIAQLEATT	LMW-glutenin			TIIHSIIMQ	gamma-gliadin
				LQPHQIAQLEATTS	LMW-glutenin			TIIHSIIMQQE	gamma-gliadin
				LQPHQIAQLEATTSI	LMW-glutenin			TIIHSIIMQQEQQ	gamma-gliadin
				LQPHQIAQLEVM	LMW-glutenin			TIIHSIIMQQEQQEQ	gamma-gliadin
				LQPHQIAQLEX	LMW-glutenin			TIIHSIIMQQEQQEQQ	gamma-gliadin
				LQPHQLAQ	LMW-glutenin			TIIHSIIMQQEQQEQQQ	gamma-gliadin
				LQPHQLAQL	LMW-glutenin			TIIHSIIMQQEQQEQQQGMH	gamma-gliadin
				LQQQCIPVAM	LMW-glutenin			TQQPQQPFPQ	gamma-gliadin
				LQQQCIPVAMQ	LMW-glutenin			TQQPQQPFPQFQQPHQPF	gamma-gliadin
				LQQQCSPVAI	LMW-glutenin			TQQPQQPFPQLQQPQQPFPQPQ	gamma-gliadin
				LQQQCSPVAM	LMW-glutenin			TQQPQQPFPQQPQQPF	gamma-gliadin
				LQQQCSPVAMP	LMW-glutenin			TQQPQQPFPQQPQQPFPQ	gamma-gliadin
				LQQQCSPVAMPQ	LMW-glutenin			TQQPYPQQQPL	gamma-gliadin
				LQQQCSPVAMPQH	LMW-glutenin			VFVPPECSTT	gamma-gliadin
				LQQQCSPVAMPQHL	LMW-glutenin			VHVPPYCSPF	gamma-gliadin
				LQQQCSPVAMPQHLA	LMW-glutenin			VLKTLPTM	gamma-gliadin
				LQQQCSPVAMPQS	LMW-glutenin			VLKTLPTMCN	gamma-gliadin
				LQQQCSPVAMPQSL	LMW-glutenin			VLPQQQAQF	gamma-gliadin
				LQQQCSPVAMSQ	LMW-glutenin			VLQTIPTMCN	gamma-gliadin
				LQQQCSPVATPQ	LMW-glutenin			VLQTIPTMCNVY	gamma-gliadin
				LQQQCSPVATPQIL	LMW-glutenin			VLQTLPSMCN	gamma-gliadin
				LQQQCSPVP	LMW-glutenin			VLRTLPTM	gamma-gliadin
				LQQQCSPVPM	LMW-glutenin			VLVQGQGVAQPQQL	gamma-gliadin
				LQQQCSPVPMP	LMW-glutenin			VMQQQCCQQL	gamma-gliadin
				LQQQCSPVPMPQR	LMW-glutenin			VPPECSIIKAPF	gamma-gliadin
				LQQQCSPVRMP	LMW-glutenin			VPPECSIIRAPF	gamma-gliadin
				LVLPPQQQQQQL	LMW-glutenin			VQGQGIIQPQQ	gamma-gliadin
				NQPQQQQPQQSVQGVSQPQQQQK	LMW-glutenin			VQGQGIIQPQQL	gamma-gliadin
				NQPQQQQPQQSVQGVSQPQQQQKQL	LMW-glutenin			VQGQGIIQPQQLAQL	gamma-gliadin
				QFPQQQIPVVQPSVL	LMW-glutenin			VQGQGIIQPQQLAQLEA	gamma-gliadin
				QHQQFPQQQIPVVQPSVL	LMW-glutenin			VQGQGIIQPQQLAQLEAIRSL	gamma-gliadin
				QLAYQIAQLEVM	LMW-glutenin			VQGQGIIQPQQPAQL	gamma-gliadin
				QLFPQQPSF	LMW-glutenin			VQGQGIIQPQQPAQLEA	gamma-gliadin
				QLGQCVSQPQQQL	LMW-glutenin			VQGQGIIQPQQPAQY	gamma-gliadin
				QLGQCVSQPQQQLQQQL	LMW-glutenin			VQQQIPVVQPSIL	gamma-gliadin
				QLGQCVSQPQQQSQQQL	LMW-glutenin			VQSQLQQLGQGMPIQL	gamma-gliadin
				QLPQIPQQSRY	LMW-glutenin			VRPDCSTINAPF	gamma-gliadin
				QLQQIPEQSRY	LMW-glutenin			VSIILPRSDCQVM	gamma-gliadin
				QQIIPQQPQQPF	LMW-glutenin			VYVPPECSII	gamma-gliadin
				QQIPVIHPSVL	LMW-glutenin			VYVPPECSIIKAPF	gamma-gliadin
				QQIPVVQPSVL	LMW-glutenin			VYVPPECSIIRAPF	gamma-gliadin
				QQLDPCKVF	LMW-glutenin			VYVPPECSIM	gamma-gliadin
				QQLGQQPQQQQI	LMW-glutenin			WSIIWPQSDCQVM	gamma-gliadin
				QQLNPCKIF	LMW-glutenin			XLQQCNHVS	gamma-gliadin
				QQLNPCKV	LMW-glutenin			YEAIRAILY	gamma-gliadin
				QQLNPCKVF	LMW-glutenin			YLQQQLNPCKEF	gamma-gliadin
				QQLPQIPEQF	LMW-glutenin			YLQQQMNPCKNF	gamma-gliadin
				QQLPQIPQQSRY	LMW-glutenin			YQQPQHTFPQPQ	gamma-gliadin
				QQLQQIPEQSRY	LMW-glutenin			YQQPQHTFPQPQQTF	gamma-gliadin
				QQPFPQPQTQQ	LMW-glutenin			YQQPQHTFPQPQQTFPHQPQ	gamma-gliadin
				QQPILPQQPSFSQQQQQL	LMW-glutenin			YQQPQQTFPQPQ	gamma-gliadin
				QQPPFSQQQQIPVIHPSVL	LMW-glutenin			YQQQQVGQGTL	gamma-gliadin
				QQPPFSQQQQPVIPQQPPF	LMW-glutenin			EACRQVVDQQL	HMW-glutenin
				QQPQPQQGQQQQVPQSVL	LMW-glutenin			EACRQVVDQQLAGRLPW	HMW-glutenin
				QQPQPQQVGQQQQVPQSAF	LMW-glutenin			EACRRVVDQQLVGQLPW	HMW-glutenin
				QQPQQQLGQQPQQQQQQVL	LMW-glutenin			EQQTEVPSKGGSFYPGGTAPPLQQGGW	HMW-glutenin
				QQPVIPQQPPF	LMW-glutenin			EQQTEVPSKGGSFYPGGTAPPLQQGGWW	HMW-glutenin
				QQPVLPQQPPFSQQ	LMW-glutenin			EQTVVPPKGGSF	HMW-glutenin
				QQPVLPQQQIPSVQPSIL	LMW-glutenin			EQTVVPPKGGSFYPGETTPL	HMW-glutenin
				QQPXPQQPQPY	LMW-glutenin			GQGQPRYYPTSPQQPGQEQQPRQL	HMW-glutenin
				QQQCCQQLPQIPEQF	LMW-glutenin			GQGQQPGQGQQGYPSATFPQQPGQW	HMW-glutenin
				QQQCCQQLPQIPEQL	LMW-glutenin			GQGRQIGQGQQSGQGQQGY	HMW-glutenin
				QQQCCQQLPQISEQF	LMW-glutenin			GYYPTSPQLSGQGQRPGQW	HMW-glutenin
				QQQLGQQPQQQQI	LMW-glutenin			HQQGGGFGGGL	HMW-glutenin
				QQQPILPQQPSFSQQQQQL	LMW-glutenin			HQQGGGFGGGLTTEQPQGGKQPF	HMW-glutenin
				QQQPLPPQQTFPQQPL	LMW-glutenin			HQSGQGQQGYYPSSL	HMW-glutenin
				QQQPPFLQQQQPSLPQQPPFSQQQQQL	LMW-glutenin			HVSVEQPSASL	HMW-glutenin
				QQQPPFSQQQPILPQQPPFSQQQQL	LMW-glutenin			LLQPGQGQQGPY	HMW-glutenin
				QQQPPFSQQQQPPFSQQQQSPF	LMW-glutenin			LQPGQGQQGPY	HMW-glutenin
				QQQQGQSIIQY	LMW-glutenin			LQPGQGQQGPYQ	HMW-glutenin
				QQQQPILPQQPPFSQH	LMW-glutenin			LQPGQGQQGYYPTSL	HMW-glutenin
				QQQQPLLPQQPPF	LMW-glutenin			LQPGQGQQGYYPTSPQQSGQGQQL	HMW-glutenin
				QQQQPQQLGQCVSQPQQQL	LMW-glutenin			LQPGQGQQGYYPTSPQQSGQGQQLGQ	HMW-glutenin
				QQQQPQQLGQCVSQPQQQLQQQL	LMW-glutenin			LQPGQGQQGYYPTSPQQSGQGQQLGQW	HMW-glutenin
				QQQQQPILPQQPSFSQQQQQL	LMW-glutenin			LQPGQGQQGYYPTSSQQSGQGHQSGQGQQGY	HMW-glutenin
				QSVQGVSQPQQQQKQL	LMW-glutenin			LRDVSPECRPVAL	HMW-glutenin
				QTPLPQGQL	LMW-glutenin			LSGQGQRPGQW	HMW-glutenin
				QVGQQQQVPQSAF	LMW-glutenin			LTSPQQSGQGQQPGQL	HMW-glutenin
				SHHQQQQPIQQQPQPF	LMW-glutenin			NPSGTSTQQPGQVQQL	HMW-glutenin
				SHQQQQQPVQQQPQPFPQ	LMW-glutenin			NPSGTSTQQPGQVQQLGQGQQGY	HMW-glutenin
				SHQQQQQPVQQQPQPFPQQQPC	LMW-glutenin			PQQPGQGQGQQGYYPGATSL	HMW-glutenin
				SIFLQEQPQQSVQ	LMW-glutenin			PQQPGQGQQPGQRQPW	HMW-glutenin
				SIILQEQQQ	LMW-glutenin			PSATFPQQPGQGQGQQGY	HMW-glutenin
				SIILQEQQQGF	LMW-glutenin			QCERELQELQEREL	HMW-glutenin
				SIILQEQQQV	LMW-glutenin			QCERELQESSLEAC	HMW-glutenin
				SIILQEQQQVQ	LMW-glutenin			QCERELQESSLEACR	HMW-glutenin
				SIILQEQQQVQGSIQ	LMW-glutenin			QCERELQESSLEACRQ	HMW-glutenin
				SIILQQQQQQQ	LMW-glutenin			QCERELQESSLEACRQVVDQQL	HMW-glutenin
				SIILQQQQQQQQ	LMW-glutenin			QCERELQESSLEACRR	HMW-glutenin
				SIILQQQQQQQQQ	LMW-glutenin			QELGQGQQGYYPT	HMW-glutenin
				SIILQQQQQQQQQQ	LMW-glutenin			QELGQGQQGYYPTSL	HMW-glutenin
				SIILQQQQQQQQQQQ	LMW-glutenin			QELGQGQQGYYPTSLH	HMW-glutenin
				SIILQQQQQQQQQQQQGQSIIQY	LMW-glutenin			QGQQTTVSPHPGQQTTVSPH	HMW-glutenin
				SIVLQEQPQQ	LMW-glutenin			QGQQTTVSPHQGQQTTVSPH	HMW-glutenin
				SIVLQEQPQQL	LMW-glutenin			QIGQGQQGYYPTSL	HMW-glutenin
				SIVLQEQQHGQ	LMW-glutenin			QIGQGQQPGQW	HMW-glutenin
				SIVLQEQQHGQG	LMW-glutenin			QIGQGQQSGQGQQGY	HMW-glutenin
				SIVLQEQQHGQGF	LMW-glutenin			QLGQGQQPRQW	HMW-glutenin
				SIVLQEQQQVR	LMW-glutenin			QLRDVSPECRPV	HMW-glutenin
				SIVLREQSLQ	LMW-glutenin			QLRDVSPECRPVAL	HMW-glutenin
				SIVLREQSLQL	LMW-glutenin			QLVGQLPW	HMW-glutenin
				SLLLQQQQQQ	LMW-glutenin			QQGSYPSTTSPQQSGQGQQGY	HMW-glutenin
				SQKQQPVLPQQPAF	LMW-glutenin			QQLQQGIFW	HMW-glutenin
				SQMLQQSICH	LMW-glutenin			QQLQQVIFW	HMW-glutenin
				SQQPPFSQQQQPVLPQQSPF	LMW-glutenin			QQLRDVSPECRPV	HMW-glutenin
				SQQPPISQQQQPPF	LMW-glutenin			QQLRDVSPECRPVAL	HMW-glutenin
				SQQQLPPFSQQQSPF	LMW-glutenin			QQPEQGQPGYYPTSPQQPGQL	HMW-glutenin
				SQQQPCTPQQTPLPQGQLY	LMW-glutenin			QQPGQGQQIGQGQQGY	HMW-glutenin
				SQQQPILPQQPPF	LMW-glutenin			QQPGQGQQPGQW	HMW-glutenin
				SQQQPILPQQPPFSQQ	LMW-glutenin			QQPGQGQQQGQGQQGYYPTSL	HMW-glutenin
				SQQQPILPQQPPFSQQQQL	LMW-glutenin			QQPTQGQQRQQPGQGQQL	HMW-glutenin
				SQQQPPFW	LMW-glutenin			QQSGQGQQGHYPTSL	HMW-glutenin
				SQQQQIPVIHPSVL	LMW-glutenin			QSATSPQQPGQGQGQQETYPIATSPHQPGQW	HMW-glutenin
				SQQQQPLLPQQPPF	LMW-glutenin			QXGQGQQGYYPT	HMW-glutenin
				SQQQQPPFSQQQPPF	LMW-glutenin			RDVSPECRPV	HMW-glutenin
				SQQQQPPFSQQQQPPFSQQHQSPFSQQ	LMW-glutenin			RDVSPECRPVA	HMW-glutenin
				SQQQQPPFSQQQQSPF	LMW-glutenin			RDVSPECRPVAL	HMW-glutenin
				SQQQQPVIPQQPPF	LMW-glutenin			RQQPVQGQQIGQGQQPEQGQQPGQW	HMW-glutenin
				SQQQQPVLPQQQPV	LMW-glutenin			SGQGQQPGQGQQSGQGQQGQQPGQGQQAY	HMW-glutenin
				SQQQQPVLPQQQPVIIL	LMW-glutenin			SLLQPGQGQQGPY	HMW-glutenin
				SQQQQQPPFLQQQQPPF	LMW-glutenin			SLQQPGQGQQGHY	HMW-glutenin
				SQQQQQPVLPQQPPFSQQ	LMW-glutenin			SLQQPGQGQQGHYPASL	HMW-glutenin
				SQQQQQPVLPQQQ	LMW-glutenin			SLQQPGQGQQIGQGQQGY	HMW-glutenin
				SQQQQQPVLPQQQI	LMW-glutenin			SLQQPGQGQQPGQW	HMW-glutenin
				SQQQQQPVLPQQQIPF	LMW-glutenin			SLQQSGQGQQGY	HMW-glutenin
				SQQQQQQLFPQQPSF	LMW-glutenin			SLQQTGQGQQSGQGQQGYY	HMW-glutenin
				SQQQQQQPILPQQPPFSQH	LMW-glutenin			SRQQSGQGQQPGQGQQSGQGQQGQQPGQGQQAY	HMW-glutenin
				SQQQQQQQPILPQQPSFSQQQQQL	LMW-glutenin			SSQQPGQGQQGSYPGSTFPQQPGQGQQPGQRQPW	HMW-glutenin
				SQQRPPFSQQQ	LMW-glutenin			SSSLQQPGQGLQGHYPASL	HMW-glutenin
				SVLLQPHQIAQL	LMW-glutenin			SWQGQQGY	HMW-glutenin
				SVNVPLYET	LMW-glutenin			SYPSATFPQQPGQGQGQQGYYPG	HMW-glutenin
				SVNVPLYETT	LMW-glutenin			SYPSATFPQQPGQGQGQQGYYPGAT	HMW-glutenin
				SVQGVSQPQQQL	LMW-glutenin			SYPSATFPQQPGQGQGQQGYYPGATS	HMW-glutenin
				TQQQQPPFSQQPPISQ	LMW-glutenin			SYPSATFPQQPGQGQGQQGYYPGATSL	HMW-glutenin
				TQQQQPPFSQQPPISQQQQPPFSQQ	LMW-glutenin			TASLQQPGQGQQGHYPASL	HMW-glutenin
				TQQQQPQELGQCVSQPQ	LMW-glutenin			TEQPQGGKQPF	HMW-glutenin
				TQQQQPQELGQCVSQPQQQ	LMW-glutenin			TQQKPGQGYNPGGTSPL	HMW-glutenin
				TQQQQPQELGQCVSQPQQQSQQQL	LMW-glutenin			TVQGYYPSVSSPQQGPY	HMW-glutenin
				TVLPQQPAFSQQQHQQLL	LMW-glutenin			TVSPHQGQQTTVSPHQGQQTTVSPH	HMW-glutenin
				VLQQLNPCKVF	LMW-glutenin			VSPHQGQQTTVSPHQGQQTTVSPH	HMW-glutenin
				VLQQQCCQQL	LMW-glutenin			VYYPTSPQQPGQL	HMW-glutenin
				VLQQQCCQQLPQIPEQF	LMW-glutenin			YPGGTAPPLQQGGW	HMW-glutenin
				VLQQQCCQQLPQIPEQI	LMW-glutenin			YPGGTAPPLQQGGWW	HMW-glutenin
				VQPQQQQPQQSGQGVSQHQQQSQQQQQLGQCSF	LMW-glutenin			YPGQASPQQPGQGQQPGKW	HMW-glutenin
				VQPQQQQPQQSGQGVSQSQQQSQQQL	LMW-glutenin			YPGQASPQQSGQGQQPGQEQQPGQGQQDQQPGQRQQ	HMW-glutenin
				VQPQQQQPQQSVQGVY	LMW-glutenin			YPGQASPQRPGQGQQPGQGQQGY	HMW-glutenin
				AQQPEQIISQQPFPL	omega-gliadin			YPGQASPQRPGQGQQPGQGQQSGQGQQGY	HMW-glutenin
				AQQPEQIISQQPFPLQPQQPF	omega-gliadin			YPIATSPQQPGQGQ	HMW-glutenin
				AQQPEQLISQQPF	omega-gliadin			YPIATSPQQPGQGQQL	HMW-glutenin
				ELQSPQQSF	omega-gliadin			YPISPQQPGQGQQSGQGQPGYYPTSL	HMW-glutenin
				GQQPEQIISQRPQQPF	omega-gliadin			YPISPQQSGQGQQPGQGQQGY	HMW-glutenin
				GQQPEQIISQRPQQPFPLQPQQQF	omega-gliadin			YPSAISPQQSGQGQQGY	HMW-glutenin
				GQQPEQIISR	omega-gliadin			YPSSLQQPGQGQQIGQGQQGYYPTSL	HMW-glutenin
				GSSLTSIGGQ	omega-gliadin			YPSVSSPQQGPY	HMW-glutenin
				ILQPQQPLPQQPQQPF	omega-gliadin			YPTSPQQLGQGQQPGQW	HMW-glutenin
				KELQSPQQSF	omega-gliadin			YPTSPQQSGQGQQL	HMW-glutenin
				LQQQQFPQQQPPQQH	omega-gliadin			YPTSPQQSGQGQQLGQ	HMW-glutenin
				PLQPHQPY	omega-gliadin			YPTSPQQSGQGQQPGHEQQPGQW	HMW-glutenin
				PLRPQQPFPQQPQQSQQ	omega-gliadin			YPTSPQQSGQGQQPGQGQQPR	HMW-glutenin
				PQQPQRFP	omega-gliadin			YPTSPQQSGQGQQPGQGQQPRQGQ	HMW-glutenin
				PSQQPFPTPQQQF	omega-gliadin			YPTSPQQSGQGQQPGQGQQPRQGQQ	HMW-glutenin
				PSQQPFPTPQQQFPQQSQQPF	omega-gliadin			YPTSPQQSGQGQQPGQGQQPRQGQQGY	HMW-glutenin
				QIIPQQPQQPF	omega-gliadin			YPTSPQQSGQGQQPGQGQSGY	HMW-glutenin
				QIIPQQTQQPF	omega-gliadin			CCQQLPQIPEQF	LMW-glutenin
				QIIPQQTQQPFPL	omega-gliadin			CCQQLPQIPEQI	LMW-glutenin
				QLQRPEQQFPQQPQ	omega-gliadin			CCQQLPQIPEQLR	LMW-glutenin
				QPQQPVPQQPQRPF	omega-gliadin			CCQQLPQIPEQSRSEAIR	LMW-glutenin
				QQPQQSYPVQPQQPFPQPQPVPQ	omega-gliadin			CCQQLPQIPQQS	LMW-glutenin
				RPQQPFPQQPQQSQQ	omega-gliadin			CCQQLPQIPQQSRY	LMW-glutenin
				RQINPSEQEL	omega-gliadin			CCQQLPQISEQF	LMW-glutenin
				SFPQPQPQQPQQPS	omega-gliadin			CCRQLPQIPEQSRY	LMW-glutenin
				SFPQPQPQQPQQPSIL	omega-gliadin			CGVNVPLY	LMW-glutenin
				SLQPQQPVPQQPQRPF	omega-gliadin			CNVNVSLY	LMW-glutenin
				SQQPQRPQQPF	omega-gliadin			CQQLPQIPEQI	LMW-glutenin
				SQQPQRPQQPFPQQL	omega-gliadin			CQQLPQIPEQSRSEAIRAIVY	LMW-glutenin
				SQQPQRPQQPFPQQPQ	omega-gliadin			CQQLPQIPQQSRY	LMW-glutenin
				SQQPQRPQQPFPQQPQQ	omega-gliadin			CQQLPQISEQF	LMW-glutenin
				TARQLNSSEQELQSPQQPVPKEQ	omega-gliadin			CSVNVPLYETTTSVPL	LMW-glutenin
								CSVNVPVY	LMW-glutenin
								CVSQPQQQLQQQL	LMW-glutenin
								CVSQPQQQSQQQL	LMW-glutenin
								CVSQPQQQSQQQLGQQPQQQQL	LMW-glutenin
								DAIRAITY	LMW-glutenin
								FLQPHQIAQLEVM	LMW-glutenin
								FLQPHQLAQL	LMW-glutenin
								FVQPQQQQPQQSGQGVSQHQQQ	LMW-glutenin
								GIFLQPHQISQL	LMW-glutenin
								GLQQPILSQQQPCTPQ	LMW-glutenin
								GQCVSQPQQQL	LMW-glutenin
								GQCVSQPQQQLQQ	LMW-glutenin
								GQCVSQPQQQLQQQL	LMW-glutenin
								GQCVSQPQQQSQQQL	LMW-glutenin
								GQCVSQPQQQSQQQLGQQPQQQQ	LMW-glutenin
								GQCVSQPQQQSQQQLGQQPQQQQL	LMW-glutenin
								GQQPQEQQVQQGTF	LMW-glutenin
								GQQPQQQQIPQGIF	LMW-glutenin
								GQQPQQQQL	LMW-glutenin
								GQQPQQQQQQVL	LMW-glutenin
								GQQPQQQQVQQGTF	LMW-glutenin
								GQQQVGQCSF	LMW-glutenin
								GQWPQQQQVPQGTL	LMW-glutenin
								GSIQTPQQQPQQL	LMW-glutenin
								GSIQTQQQQPQEL	LMW-glutenin
								GSIQTQQQQPQQL	LMW-glutenin
								GSIQTQQQQPQQLG	LMW-glutenin
								GTLLQPHQIAQL	LMW-glutenin
								GVSQPQQPXQ	LMW-glutenin
								HQVGQCSF	LMW-glutenin
								IPQQPQPFPQQPQPF	LMW-glutenin
								LFPQQPSF	LMW-glutenin
								LLQPHQIAQL	LMW-glutenin
								LLQPHQIAQLELM	LMW-glutenin
								LQPHQIAQLE	LMW-glutenin
								LQPHQIAQLEATT	LMW-glutenin
								LQPHQIAQLEATTSXAL	LMW-glutenin
								LQPHQIAQLEVM	LMW-glutenin
								LQPHQIAQLEVMTS	LMW-glutenin
								LQPHQIAQLEX	LMW-glutenin
								LQPHQISQLEVM	LMW-glutenin
								LQPHQLAHLEVM	LMW-glutenin
								LQPHQLAQ	LMW-glutenin
								LQPHQLAQL	LMW-glutenin
								LQPHQLAQLEA	LMW-glutenin
								LQPQQIAQLEVM	LMW-glutenin
								LQQQCIPVAM	LMW-glutenin
								LQQQCIPVAMQ	LMW-glutenin
								LQQQCSPVAM	LMW-glutenin
								LQQQCSPVAMP	LMW-glutenin
								LQQQCSPVAMPQS	LMW-glutenin
								LQQQCSPVAMT	LMW-glutenin
								LQQQCSPVP	LMW-glutenin
								LQQQCSPVPMP	LMW-glutenin
								LQQQCSPVPMPQR	LMW-glutenin
								LQQQCSPVRMXQ	LMW-glutenin
								LQQQCSPVVMPQ	LMW-glutenin
								NQPQQQQPQQSVQGVSQPQQQ	LMW-glutenin
								NQPQQQQPQQSVQGVSQPQQQQ	LMW-glutenin
								NQPQQQQPQQSVQGVSQPQQQQKQ	LMW-glutenin
								NQPQQQQPQQSVQGVSQPQQQQKQL	LMW-glutenin
								PLQPFPSQQPFPQQPPFW	LMW-glutenin
								PQQPFPSQQPFPQQPPFW	LMW-glutenin
								PQQPPFGLQQPIL	LMW-glutenin
								PQQPPFWQQQPIL	LMW-glutenin
								PQQPPFWQQQPVL	LMW-glutenin
								PQQPQPFPQQPIPQQPQPY	LMW-glutenin
								PQQPQQPFPPQQPFPQQPPFGL	LMW-glutenin
								PQQPQQPFPPQQPFPQQPPFW	LMW-glutenin
								PSQQPFPQQPPFW	LMW-glutenin
								QCCQQLPQIPEQL	LMW-glutenin
								QCCQQLPQIPQQSRY	LMW-glutenin
								QFPQQQIPVVQPSVL	LMW-glutenin
								QHQQFPQQQIPVVQPSVL	LMW-glutenin
								QIAQLEATTSXAL	LMW-glutenin
								QLAYQIAQLEVM	LMW-glutenin
								QLGQCVSQPQQQ	LMW-glutenin
								QLGQCVSQPQQQL	LMW-glutenin
								QLGQCVSQPQQQSQ	LMW-glutenin
								QLGQCVSQPQQQSQQ	LMW-glutenin
								QLGQCVSQPQQQSQQQL	LMW-glutenin
								QLGQQPQQQQLAQVPF	LMW-glutenin
								QLPPFSQQLPPFSQQ	LMW-glutenin
								QLPQIPEQF	LMW-glutenin
								QLPQIPEQI	LMW-glutenin
								QLPQIPQQS	LMW-glutenin
								QLPQIPQQSRY	LMW-glutenin
								QLPQISEQF	LMW-glutenin
								QLPQQQISIVQPSVL	LMW-glutenin
								QLQQIPEQSRY	LMW-glutenin
								QLQQLGQQPQQQQIPQGIF	LMW-glutenin
								QLSQIPEQSRY	LMW-glutenin
								QLVQGVSQPQQQSQ	LMW-glutenin
								QPFPQQPQQPVPQQPQQPV	LMW-glutenin
								QPQQPSPQQQQL	LMW-glutenin
								QQCCQQLPQIPEQL	LMW-glutenin
								QQGQSIIQY	LMW-glutenin
								QQIAQQPQQLPQ	LMW-glutenin
								QQIPEQSRY	LMW-glutenin
								QQIPQQQFPQPQQIPQ	LMW-glutenin
								QQIPSVQPSIL	LMW-glutenin
								QQIPVIHPSVL	LMW-glutenin
								QQIPVVQPSVL	LMW-glutenin
								QQISIVQPSVL	LMW-glutenin
								QQKPFPQQPP	LMW-glutenin
								QQKPFPQQPPFGL	LMW-glutenin
								QQLDPCKVF	LMW-glutenin
								QQLGQQPQQQQI	LMW-glutenin
								QQLGQQPQQQQIPQ	LMW-glutenin
								QQLNPCKV	LMW-glutenin
								QQLNPCKVF	LMW-glutenin
								QQLNPCKVFL	LMW-glutenin
								QQLPQIPEQF	LMW-glutenin
								QQLPQIPEQIRH	LMW-glutenin
								QQLPQIPEQSRSEAIRAIVY	LMW-glutenin
								QQLPQIPQQSRY	LMW-glutenin
								QQLPRIPEQSRY	LMW-glutenin
								QQPFPQPQTQQ	LMW-glutenin
								QQPILPQQPPFL	LMW-glutenin
								QQPLLPQQPPF	LMW-glutenin
								QQPLSQQQQPFPQ	LMW-glutenin
								QQPPFSQQQQIPVIHPSVL	LMW-glutenin
								QQPPFSQQQQPPFSQQQQIPVIHPSVL	LMW-glutenin
								QQPPFSQQQQPPY	LMW-glutenin
								QQPPFSQQQQPVIPQQPPF	LMW-glutenin
								QQPPFSQQQQSPF	LMW-glutenin
								QQPPFSQQQQTPF	LMW-glutenin
								QQPQPQQGQQQQVPQ	LMW-glutenin
								QQPQPQQGQQQQVPQSVL	LMW-glutenin
								QQPQPQQVGQQQQVPQSAF	LMW-glutenin
								QQPQQIQQL	LMW-glutenin
								QQPQQQLGQQPQEQQVQQGTF	LMW-glutenin
								QQPQQQLGQQPQQQQQQVL	LMW-glutenin
								QQPQQQLGQQPQQQQVQQGTF	LMW-glutenin
								QQPVIPQQPPF	LMW-glutenin
								QQPVLPQQPPFSQQ	LMW-glutenin
								QQPVLPQQQIPF	LMW-glutenin
								QQPVLPQQQIPSVQPSIL	LMW-glutenin
								QQPVLPQQQIPY	LMW-glutenin
								QQPXPQQPQPY	LMW-glutenin
								QQPXPQQPQPYPQQPQPY	LMW-glutenin
								QQQCCQQLPQIPEQF	LMW-glutenin
								QQQCCQQLPQIPEQL	LMW-glutenin
								QQQCCQQLPQISEQF	LMW-glutenin
								QQQGQSIIQY	LMW-glutenin
								QQQLGQQPEQQQL	LMW-glutenin
								QQQLGQQPQQQQI	LMW-glutenin
								QQQPLLPQQPPF	LMW-glutenin
								QQQPLPPQQTFPQQPL	LMW-glutenin
								QQQPPFSQQ	LMW-glutenin
								QQQPPFSQQQQPPFSQQQQSPF	LMW-glutenin
								QQQPVLPQQQILF	LMW-glutenin
								QQQQGQSIIQY	LMW-glutenin
								QQQQPQQLGQ	LMW-glutenin
								QQQQPVIPQQQIPF	LMW-glutenin
								QQQQQGQSIIQY	LMW-glutenin
								QQQQQQGQSIIQY	LMW-glutenin
								QQQQQQQQPFPQQPSFSQQQQLI	LMW-glutenin
								QQQQQQQQQQQGQSIIQY	LMW-glutenin
								QQQVPQGTL	LMW-glutenin
								QQSQQPFPQQSQQPFP	LMW-glutenin
								QQSQQQQVGQCSF	LMW-glutenin
								QQVGQCSF	LMW-glutenin
								QSGQGVSQHQQQSQQQQQL	LMW-glutenin
								QSVQGVSQPQQQQKQL	LMW-glutenin
								QTPLPQGQL	LMW-glutenin
								QXVQGVSQPQQQ	LMW-glutenin
								RHEAIRAIVY	LMW-glutenin
								RHEAVRAIVY	LMW-glutenin
								RTLPTMCNVD	LMW-glutenin
								RTLPTMCNVN	LMW-glutenin
								SEAIRAIVY	LMW-glutenin
								SHHQQQQPIQQQPQPF	LMW-glutenin
								SHHQQQQPVQQQPQPFPQQQPC	LMW-glutenin
								SHIPGLEKPSQQQPLPL	LMW-glutenin
								SHQQQQQPVQQQPQPFPQQQPC	LMW-glutenin
								SIFLQEQPQ	LMW-glutenin
								SIFLQEQPQQSVQ	LMW-glutenin
								SIILQEQQQGF	LMW-glutenin
								SIILQEQQQGFV	LMW-glutenin
								SIILQEQQQGFVQ	LMW-glutenin
								SIILQEQQQV	LMW-glutenin
								SIILQEQQQVQ	LMW-glutenin
								SIILQEQQQVQGSIQ	LMW-glutenin
								SIILQEQQQVQGSIQTQ	LMW-glutenin
								SIILQEQQQVQGSIQTQQ	LMW-glutenin
								SIILQEQQQVQGSIQTQQQQPQQL	LMW-glutenin
								SIILQQQQQQQ	LMW-glutenin
								SIILQQQQQQQQ	LMW-glutenin
								SIILQQQQQQQQQ	LMW-glutenin
								SIILQQQQQQQQQQQ	LMW-glutenin
								SIILQQQQQQQQQQQQ	LMW-glutenin
								SIVLQEQPQ	LMW-glutenin
								SIVLQEQPQQ	LMW-glutenin
								SIVLQEQQH	LMW-glutenin
								SIVLQEQQHGQ	LMW-glutenin
								SIVLQEQQHGQG	LMW-glutenin
								SIVLQEQQHGQGF	LMW-glutenin
								SIVLQEQQHGQGFN	LMW-glutenin
								SIVLQEQQHGQGL	LMW-glutenin
								SIVLQEQQHGQGLN	LMW-glutenin
								SIVLQEQQQ	LMW-glutenin
								SIVLQEQQQVR	LMW-glutenin
								SIVLQEQQQVRG	LMW-glutenin
								SIVLQEQQQVRGSIQ	LMW-glutenin
								SIVLQEQSL	LMW-glutenin
								SIVLQEQSLQLVQ	LMW-glutenin
								SIVLREQS	LMW-glutenin
								SIVLREQSL	LMW-glutenin
								SIVLREQSLQ	LMW-glutenin
								SIVLREQSLQL	LMW-glutenin
								SLLLQQQQQQ	LMW-glutenin
								SQHQQPVLPQQQIPSVQPSIL	LMW-glutenin
								SQIPEQSRY	LMW-glutenin
								SQQLPPFSQQ	LMW-glutenin
								SQQPPISQQQQPPF	LMW-glutenin
								SQQPPISQQQQPPFSQQQQPPF	LMW-glutenin
								SQQPPISQQQQPQFL	LMW-glutenin
								SQQQEQQQQPPFLQQQQPPF	LMW-glutenin
								SQQQLPPFSQQQPPF	LMW-glutenin
								SQQQPCTPQQTPLPQGQLY	LMW-glutenin
								SQQQPILPQGPPF	LMW-glutenin
								SQQQPILPQQPPF	LMW-glutenin
								SQQQPILPQQPPFSQQQQL	LMW-glutenin
								SQQQPPFSQQQPILPQGPPF	LMW-glutenin
								SQQQQIPVIHPSVL	LMW-glutenin
								SQQQQPLLPQQPPF	LMW-glutenin
								SQQQQPPFSQQQPPF	LMW-glutenin
								SQQQQPPFSQQQPPFSQQ	LMW-glutenin
								SQQQQPPFSQQQQIPVIHPSVL	LMW-glutenin
								SQQQQPPFSQQQQPPF	LMW-glutenin
								SQQQQPPFSQQQQPPFSQQQQSPF	LMW-glutenin
								SQQQQPPFSQQQQSPF	LMW-glutenin
								SQQQQPSSQQPPFPQQH	LMW-glutenin
								SQQQQPVLPQQPPFSQQ	LMW-glutenin
								SQQQQPVLPQQQPV	LMW-glutenin
								SQQQQPVLPQQQPVIIL	LMW-glutenin
								SQQQQQPILPQQPPFSQQ	LMW-glutenin
								SQQQQQPLLPQQPPFSQH	LMW-glutenin
								SQQQQQPPFLQQQQPPF	LMW-glutenin
								SQQQQQPVLPQQPPFSQQ	LMW-glutenin
								SQQQQQPVLPQQQIPF	LMW-glutenin
								SVLLQPHQIAQL	LMW-glutenin
								SVNVPLYET	LMW-glutenin
								SVQGVSQPQQQL	LMW-glutenin
								TQPVIPQQSPF	LMW-glutenin
								TQQQPPFSQQPPISQQ	LMW-glutenin
								TQQQPPFSQQPPISQQQQPPF	LMW-glutenin
								TQQQPPFSQQPPISQQQQPPFSQQQQTPF	LMW-glutenin
								TQQQPPFSQQPPISQQQQQQQ	LMW-glutenin
								TQQQPPFSQQPPISQQQQQQQQQQQPF	LMW-glutenin
								TQQQQPPFSQQPPISQQQQPPF	LMW-glutenin
								TQQQQPPFSQQPPISQQQQPPFSQQ	LMW-glutenin
								TQQQQPQELGQCVSQPQQQSQQQL	LMW-glutenin
								VHPSILQQLNPCKVF	LMW-glutenin
								VLQQLNPCKVF	LMW-glutenin
								VLQQQCCQQL	LMW-glutenin
								VLQQQCCQQLPQIPEQF	LMW-glutenin
								VLQQQCCQQLPQIPEQI	LMW-glutenin
								VLQQQCCQQLPQISEQF	LMW-glutenin
								VQGVSQPQQQSQL	LMW-glutenin
								VQGVSQPQQQSQLH	LMW-glutenin
								VQGVSQPQQQSQLHQ	LMW-glutenin
								VQGVSQPQQQSQQQQVGQC	LMW-glutenin
								VQPQQQQPQQSGQGVSQH	LMW-glutenin
								VQPQQQQPQQSGQGVSQHQQQSQQQQ	LMW-glutenin
								VQPQQQQPQQSGQGVSQHQQQSQQQQQL	LMW-glutenin
								VQPQQQQPQQSGQGVSQHQQQSQQQQQLGQCSF	LMW-glutenin
								VQPQQQQPQQSGQGVSQSQQQSQQQL	LMW-glutenin
								VQPQQQQPQQSGQGVSQSQQQSQQQLGQCSF	LMW-glutenin
								VQPQQQQPQQSVQGVY	LMW-glutenin
								VSQPQQQSQQQL	LMW-glutenin
								AQQPEQIISQQPFPLQPQQPF	omega-gliadin
								ARELNPSNKELQSPQQSF	omega-gliadin
								ELQSPQQSF	omega-gliadin
								FPQQQQFPQQEFPQQQEFPQQQQFPQ	omega-gliadin
								FPQQQQFPQQQ	omega-gliadin
								FPYLPEELSPQY	omega-gliadin
								HQQIPQQQIPQQPQQLPQ	omega-gliadin
								HQQQLPQQQFPQQQFPQ	omega-gliadin
								IIPQQPQQPFPLQPHQPY	omega-gliadin
								ILQPQQPLPQQPQQPF	omega-gliadin
								IQPQQPLPQQAEQ	omega-gliadin
								KQFPQPQQIPQ	omega-gliadin
								LQQPYPQNPY	omega-gliadin
								LQQQQFPQQQPPQQH	omega-gliadin
								PEELFPQYQIPTPL	omega-gliadin
								PLQPHQPY	omega-gliadin
								PLRPQQPFPQQPQQSQ	omega-gliadin
								PLRPQQPFPQQPQQSQQ	omega-gliadin
								PQQPFPRPQQPF	omega-gliadin
								PQQPQQPFPQPQQPF	omega-gliadin
								PQQPQQPFPQPQQPFPW	omega-gliadin
								PQQPYPSQQPY	omega-gliadin
								PQSQQIPQQQQIPQQPQ	omega-gliadin
								PSQQPFPTPQQQFPEQSQQPF	omega-gliadin
								PSQQPFPTPQQQFPQQSQQPF	omega-gliadin
								PSQQPYPSQQPFPTPQQQFPQQSQQPF	omega-gliadin
								PWQPQQPFPQPQQPF	omega-gliadin
								PWQPQQPFPQPQQPFPL	omega-gliadin
								PWQPQQPFPQPQQPI	omega-gliadin
								PWQPQQPFPQTQQ	omega-gliadin
								PYLPEELSPQYQIPTPL	omega-gliadin
								QFPHPQQSPQ	omega-gliadin
								QFPQQQEFPQQQFPQQQF	omega-gliadin
								QFPQQQQI	omega-gliadin
								QFPQQQYPQQQQF	omega-gliadin
								QIIPQQPQQPF	omega-gliadin
								QLFPIPYPPQQQSQEASPY	omega-gliadin
								QPFPQPEQPFP	omega-gliadin
								QPQQPFPQPEQPF	omega-gliadin
								QPQQPFPQPQQPIAHQPQQPF	omega-gliadin
								QPQQPFPQPQYAF	omega-gliadin
								QQFPQHQQIPQ	omega-gliadin
								QQFPQQQFPQQQ	omega-gliadin
								QQFPQQQIPQQQFPQPQ	omega-gliadin
								QQFPQQQQFPQQQ	omega-gliadin
								QQFPQQQQQIPEQPQQFPQQQF	omega-gliadin
								QQFPQQSQQPF	omega-gliadin
								QQFPWQPQQPF	omega-gliadin
								QQIPQQPQQIPQ	omega-gliadin
								QQIPQQPQQP	omega-gliadin
								QQIPQQQFPQQQ	omega-gliadin
								QQIPQQQIPQQQFPQ	omega-gliadin
								QQPQQFSQQQFPQQQFPQP	omega-gliadin
								QQPQQSYPVQPQQPFPQPQPVPQ	omega-gliadin
								QQQFPQQQFPQQQ	omega-gliadin
								QQQFPQQQQI	omega-gliadin
								QQQIPQQPQQFPQQQ	omega-gliadin
								QQQLPLQPQQPFSQP	omega-gliadin
								QQQQLPQQQFPQQQ	omega-gliadin
								QQYPQQQPSGSDV	omega-gliadin
								QQYPQQQPSGSDVIS	omega-gliadin
								QQYPQQQPSGSDVISISG	omega-gliadin
								QSFPQQSQQSQQPF	omega-gliadin
								RPQQPFPQQPQQSQQ	omega-gliadin
								RQLNPSSQEL	omega-gliadin
								SFPLQPQQPF	omega-gliadin
								SFPQPQPQQPQQPSIL	omega-gliadin
								SHQQQPFPQQPY	omega-gliadin
								SHQQQPFPQQPYPQQPY	omega-gliadin
								SHQQQPFPQQPYPQQPYPSQQPY	omega-gliadin
								SQQPEQTISQQPQQPFPQQPHQPQQPYPQQQPY	omega-gliadin
								SQQPIPQQPQPYPQQPQPF	omega-gliadin
								SSQQPFPTIQQQF	omega-gliadin
